1           **Antagonism of PP2A is an independent and conserved**  
2           **function of HIV-1 Vif and causes cell cycle arrest**

3

4   Sara Marelli<sup>1,2</sup>, James C Williamson<sup>1,2</sup>, Anna V Protasio<sup>1,2</sup>, Adi Naamati<sup>1,2</sup>, Edward JD  
5   Greenwood<sup>1,2</sup>, Janet E Deane<sup>3,4</sup>, Paul J Lehner<sup>1,2</sup>, Nicholas J Matheson<sup>1,2,\*</sup>

6

7   1. Department of Medicine, University of Cambridge, UK

8   2. Cambridge Institute for Therapeutic Immunology and Infectious Disease (CITIID),  
9   University of Cambridge, UK

10  3. Department of Clinical Neuroscience, University of Cambridge, UK

11  4. Cambridge Institute for Medical Research (CIMR), University of Cambridge, UK

12

13  \*Correspondence: [njm25@cam.ac.uk](mailto:njm25@cam.ac.uk).

## 14 **Abstract**

15 The seminal description of cellular restriction factor APOBEC3G and its antagonism by HIV-1  
16 Vif has underpinned two decades of research on the host-virus interaction. As well as  
17 APOBEC3G and its homologues, however, we have recently discovered that Vif is also able  
18 to degrade the PPP2R5 family of regulatory subunits of key cellular phosphatase PP2A  
19 (PPP2R5A-E) (Greenwood et al., 2016; Naamati et al., 2019). We now identify amino acid  
20 polymorphisms at positions 31 and 128 of HIV-1 Vif which selectively regulate the degradation  
21 of PPP2R5 family proteins. These residues covary across HIV-1 viruses *in vivo*, favouring  
22 depletion of PPP2R5A-E. Through analysis of point mutants and naturally occurring Vif  
23 variants, we further show that degradation of PPP2R5 family subunits is both necessary and  
24 sufficient for Vif-dependent G2/M cell cycle arrest. Antagonism of PP2A by HIV-1 Vif is  
25 therefore independent of APOBEC3 family proteins, and regulates cell cycle progression in  
26 HIV-infected cells.

## 27 Introduction

28 The canonical function of HIV-1 Vif is to recruit the cellular restriction factor APOBEC3G for  
29 CUL5 E3 ligase and ubiquitin-proteasome-dependent degradation in infected cells, preventing  
30 APOBEC3G encapsidation and enhancing virion infectivity (Conticello et al., 2003; Kobayashi  
31 et al., 2005; Marin et al., 2003; Mehle et al., 2004; Sheehy et al., 2002; Sheehy et al., 2003;  
32 Stopak et al., 2003; Yu et al., 2003). This interaction is very likely to be important *in vivo*,  
33 because the ability of Vif to antagonise APOBEC3G and its homologues is broadly conserved  
34 across lentiviral phylogeny, and has driven co-evolution of the mammalian APOBEC3 family  
35 (Compton et al., 2013; Nakano et al., 2017).

36 The other cell biological phenotype associated with Vif in multiple studies is the induction of  
37 G2/M cell cycle arrest (DeHart et al., 2008; Evans et al., 2018; Izumi et al., 2010; Sakai et al.,  
38 2006; Wang et al., 2007; Zhao et al., 2015). Vif-dependent cell cycle arrest does not require  
39 expression of APOBEC3 family proteins, but is reliant on lysine-48 ubiquitination and the same  
40 CUL5 E3 ligase complex recruited by Vif to deplete APOBEC3G (DeHart et al., 2008). It has  
41 therefore been suspected to reflect ubiquitination and degradation of an unknown cellular  
42 factor involved in cell cycle progression (DeHart et al., 2008). Why only certain HIV-1 Vif  
43 variants mediate this effect (Evans et al., 2018; Zhao et al., 2015), and how widely conserved  
44 it is across the lentiviral lineage, have remained unclear.

45 We have recently discovered that, in addition to APOBEC3 family proteins, Vif is also able to  
46 degrade the B56 family of regulatory subunits of the ubiquitous heterotrimeric serine-threonine  
47 phosphatase PP2A (PPP2R5A-E) in HIV-1-infected CEM-T4 T cells (Greenwood et al., 2016)  
48 and primary human CD4+ T cells (Naamati et al., 2019). This ability (illustrated in **Figure 1A**)  
49 is shared by Vif variants from diverse primate and non-primate lentiviruses (Greenwood et al.,  
50 2016), suggesting a beneficial effect on viral replication *in vivo*. In theory, however, depletion  
51 of PPP2R5A-E could be dependent on or secondary to the phylogenetically conserved ability  
52 of Vif to antagonise APOBEC3 family proteins.

53 To demonstrate that these functions are autonomous and have therefore been independently  
54 selected, we now screen a library of rationally designed Vif point mutants, and identify amino  
55 acid substitutions at residues 31 and 128 which clearly separate APOBEC3 and PPP2R5  
56 family protein depletion. We further show that antagonism of PP2A explains the ability of Vif  
57 to cause cell cycle arrest, and that this requires efficient depletion of all PPP2R5 family  
58 subunits. Naturally occurring polymorphisms of residues 31 and 128 correlate with the ability  
59 of HIV-1 Vif variants to cause cell cycle arrest, and reveal evidence of selection pressure for  
60 PPP2R5A-E depletion *in vivo*.

## 61 Results

### 62 Flow cytometric screen identifies mutations in HIV-1 Vif which separate PPP2R5B and 63 APOBEC3G depletion

64 To determine whether antagonism of PPP2R5 and APOBEC3 family proteins are independent  
65 functions of Vif, we first used the published structure of the Vif-CUL5 complex (Guo et al.,  
66 2014) to construct a library of 34 Vif variants with point mutations in solvent-exposed residues,  
67 focussing predominantly on regions distant from known APOBEC3 family protein interaction  
68 interfaces (**Figure 1B, Figure 1 – figure supplement 1A**, residues highlighted in yellow).  
69 None of these mutations is predicted to cause protein misfolding, nor interfere with the  
70 interactions between Vif and other members of the Vif-CUL5 E3 ligase complex (CBF- $\beta$ ,  
71 CUL5, ELOB and ELOC).

72 Amongst the five PPP2R5 family subunits, we previously showed that depletion of PPP2R5B  
73 is most conserved across Vif variants from HIV-1/2 and the non-human primate lentiviruses  
74 (Greenwood et al., 2016). We therefore transfected our library into HEK 293T cells (293Ts)  
75 stably expressing HA-tagged PPP2R5B or APOBEC3G, and used flow cytometry to quantify  
76 PPP2R5B and APOBEC3G depletion by each Vif variant (**Figure 1–figure supplement 1B-  
77 C and Figure 1–figure supplement 2A-C**). As well as indicating preserved APOBEC3 family  
78 substrate recruitment, the ability to deplete APOBEC3G served as a control for unanticipated  
79 effects on Vif expression or stability, or assembly of the Vif-CUL5 complex.

80 We discovered several Vif mutants to be defective for PPP2R5B depletion (**Figure 1C**).  
81 Amongst these, some mutations affected residues known to be required for depletion of  
82 APOBEC3G (K26, Y44, W70) (Letko et al., 2015) or APOBEC3C/F (R15) (Letko et al., 2015;  
83 Nakashima et al., 2016) (**Figure 1D and Figure 1–figure supplement 2C**). Conversely, Vif  
84 variants with mutations in residues Y30/I31, R33/K34 and I128 were defective for PPP2R5B  
85 depletion, yet retained the ability to antagonise APOBEC3G (**Figure 1C-E**). These residues  
86 are grouped in three similarly orientated patches on the Vif surface (**Figure 1B**, residues

87 highlighted in red). Mutations of residues I128, I31 and R33/K34 were therefore selected for  
88 further characterisation.

89 **Residues 128 and 31 of HIV-1 Vif differentially regulate APOBEC3 and PPP2R5 family**  
90 **protein depletion**

91 Vif recruits different APOBEC3 family members for degradation using distinct binding surfaces  
92 (Binka et al., 2012a; Chen et al., 2009; Dang et al., 2009; Gaddis et al., 2003; Harris and  
93 Anderson, 2016; He et al., 2008; Letko et al., 2015; Mehle et al., 2007; Nakashima et al., 2016;  
94 Ooms et al., 2016; Richards et al., 2015; Russell and Pathak, 2007; Simon et al., 2005b;  
95 Yamashita et al., 2008), and Vif variants from HIV-1/2 and the non-human primate lentiviruses  
96 differ in their abilities to deplete different PPP2R5 family subunits (Greenwood et al., 2016).  
97 We therefore sought to determine whether the mutations we found to separate depletion of  
98 PPP2R5B and APOBEC3G have similar effects on other family members. To avoid the  
99 possibility of over-expression artefacts, we focussed on endogenous APOBEC3 and PPP2R5  
100 family members expressed in CEM-T4 T cells (CEM-T4s).

101 First, we transduced CEM-T4s with a panel of Vif mutants specifically lacking the ability to  
102 deplete PPP2R5B, and examined levels of PPP2R5D by immunoblot (**Figure 2A**). Together  
103 with mutations in residues I31, I128 and R33/K34, a mutation in Y44A (also defective for  
104 APOBEC3G depletion) was included as a control. As expected WT Vif was able to fully deplete  
105 PPP2R5D (lane 3). Conversely, mutations in residues I128, I31, R33/K34 and Y44 all restored  
106 PPP2R5D levels (lanes 4-9). Interestingly, the I128A (lane 4) and Y44A (lane 9) mutations  
107 only showed a partial rescue, suggesting a differential effect on different PPP2R5 subunits  
108 (PPP2R5B vs PPP2R5D). In addition, mutations in residues R33/K34 (lanes 7-8) were  
109 associated with lower levels of Vif expression (**Figure 2A**).

110 Validated antibodies capable of detecting and differentiating endogenous levels of all  
111 APOBEC3 and PPP2R5 family proteins are not available. We therefore evaluated the activity  
112 of a similar panel of Vif mutants using a tandem mass tag (TMT)-based functional proteomic

113 approach (**Figure 2B**). CEM-T4 cells were transduced with different Vif mutants at a  
114 multiplicity of infection (MOI) of 3 (range 94.1-98.7% transduced cells), then subjected to  
115 whole cell proteome analysis after a further 48 hr.

116 In total, we identified 8,781 proteins (**Figure 2–source data 1**), including all 5 PPP2R5 family  
117 subunits (PPP2R5A/B/C/D/E) and 5 out of 7 APOBEC3 family members (B/C/D/F/G; not A/H).  
118 This concurs with previous data suggesting that APOBEC3A is restricted to myeloid cells  
119 (Berger et al., 2011; Koning et al., 2009; Peng et al., 2007; Refsland et al., 2010), and neither  
120 APOBEC3A nor APOBEC3H are expressed in CCRF-CEM cell lines at the mRNA level  
121 (Refsland et al., 2010). APOBEC3B is not antagonised by Vif (Doehle et al., 2005; Greenwood  
122 et al., 2016; Hultquist et al., 2011; Naamati et al., 2019), and is therefore not considered  
123 further.

124 As expected, all Vif mutants tested were defective for PPP2R5B depletion, and the Y44A  
125 mutant was also defective for APOBEC3G depletion (**Figure 2C-D**). In addition, and consistent  
126 with our immunoblot analysis (**Figure 2A**), substitutions of I128 led to loss of activity against  
127 PPP2R5A, with relatively preserved activity against PPP2R5C-E. Conversely, substitution of  
128 I31 led to a reciprocal pattern, with loss of activity against PPP2R5C-E, but relatively  
129 preserved activity against PPP2R5A. Substitutions of R33/K34 led to loss of activity against  
130 all PPP2R5 subunits, but were again associated with lower levels of Vif expression (**Figure**  
131 **2–figure supplement 1**), and accompanied by partial loss of activity against APOBEC3 family  
132 proteins, particularly APOBEC3F. In conclusion, therefore, mutations in residues 128 and 31  
133 separate PPP2R5 and APOBEC3 family depletion without affecting Vif stability, and  
134 differentially regulate the 5 PPP2R5 family members.

### 135 **Depletion of PPP2R5 family subunits is necessary for Vif-dependent cell cycle arrest**

136 We previously showed that expression of Vif results in extensive remodelling of the  
137 phosphoproteome in HIV-infected cells, including activation of the aurora kinases AURKA and  
138 AURKB, effects we attributed to PP2A antagonism (Greenwood et al., 2016; Naamati et al.,

139 2019). As expected, transduction of CEM-T4s with WT Vif resulted in increased AURKA/B T  
140 loop phosphorylation (**Figure 3A**, lane 3). Conversely, Vif mutants with impaired ability to  
141 antagonise PPP2R5 family subunits were unable to trigger AURKA/B phosphorylation (**Figure**  
142 **3A**, lanes 4-7).

143 Together with APOBEC3 family antagonism, it has been known for >10 years that certain Vif  
144 variants (including NL4-3 Vif) are also able to induce G2/M cell cycle arrest, and that this is  
145 dependent on CUL5 E3 ligase recruitment and the ubiquitin-proteasome system (DeHart et  
146 al., 2008; Evans et al., 2018; Izumi et al., 2010; Sakai et al., 2006; Wang et al., 2007; Zhao et  
147 al., 2015). The Vif substrate explaining this phenomenon has, however, remained obscure.

148 Since both PP2A-B56 (PP2A heterotrimers incorporating one of the B56 family of regulatory  
149 subunits, PPP2R5A-E) and aurora kinases are required to coordinate mitotic progression  
150 (Foley et al., 2011; Grallert et al., 2015; Nasa and Kettenbach, 2018; Vallardi et al., 2019), we  
151 hypothesised that depletion of PPP2R5 family subunits may explain Vif-dependent cell cycle  
152 arrest, and that Vif mutants with impaired activity against PPP2R5 family subunits may also  
153 be defective for this phenotype. To test this hypothesis, we first interrogated our proteomic  
154 dataset. As predicted, WT Vif led to elevated levels of cyclin B1, indicative of G2/M arrest  
155 (**Figure 3B**). Conversely, elevation of cyclin B1 was reduced or abolished in the presence of  
156 Vif mutants lacking the ability to deplete PPP2R5 family subunits.

157 To confirm this result and formally evaluate cell cycle progression, we measured DNA content  
158 of CEM-T4s 48 hrs after transduction with WT or mutant Vif variants. Again, WT Vif, but not  
159 Vif mutants lacking the ability to deplete PPP2R5 subunits, caused G2/M arrest (**Figure 3C-**  
160 **D**). As a control, 2 other Vif mutants (F39A and D61A) which retained the ability to antagonise  
161 PPP2RB (**Figure 1–figure supplement 2A**), also retained the ability to cause cell cycle arrest  
162 (**Figure 3–figure supplement 1**).

163 In addition to APOBEC3 and PPP2R5 family proteins, we recently showed that NL4-3 Vif is  
164 also able to target FMR1 and DPH7 (Naamati et al., 2019). Both I128A and I128D point



165 mutants retain the ability to deplete these proteins (**Figure 3–figure supplement 2**), but are  
166 unable to mediate cell cycle arrest. Depletion of PPP2R5 family subunits, but not other Vif  
167 substrates, is therefore required for Vif-dependent aurora kinase activation and G2/M cell  
168 cycle arrest.

### 169 **Depletion of PPP2R5 family subunits is sufficient to cause cell cycle arrest**

170 Consistent with PPP2R5A-E depletion by Vif, inhibition of PP2A with okadaic acid causes  
171 G2/M cell cycle arrest in CEM-T4s (**Figure 4–figure supplement 1A**). However, whilst  
172 relatively specific for PP2A over other cellular phosphatases, okadaic acid does not distinguish  
173 individual PPP2R5 family subunits, nor separate PP2A-B56 activity from the activity of other  
174 PP2A heterotrimers incorporating regulatory subunits from different families (Swingle et al.,  
175 2007).

176 Since Vif-dependent cell cycle arrest is abrogated by point mutations which rescue quite  
177 distinct PPP2R5 subunits (compare **Figure 2C** and **Figure 3D**), some functional redundancy  
178 between the different B56 family members seems likely. Indeed, all PPP2R5 family subunits  
179 share a well conserved substrate-binding pocket (Hertz et al., 2016; Wang et al., 2016), and  
180 previous studies have suggested functional equivalence in mitosis (Foley et al., 2011; Lee et  
181 al., 2017). Conversely, another more recent study suggested topological restriction of PPP2R5  
182 subunit activity within cells (Vallardi et al., 2019). We therefore sought to test the requirement  
183 for different PPP2R5 subunits for cell cycle progression using combinatorial knockdowns. To  
184 permit this approach, we used HeLa cells (HeLas) as a model system.

185 First, we confirmed that, as in CEM-T4s, expression of WT NL4-3 Vif in HeLas causes cell  
186 cycle arrest (**Figure 4–figure supplement 1B**). Next, we transfected these cells with siRNA  
187 targeting individual PPP2R5 subunits, or a pool of siRNA simultaneously targeting all subunits  
188 (same total siRNA concentration). Strikingly, we only observed cell cycle arrest when all  
189 subunits were knocked down together (**Figure 4A-B**, “pool”). Indistinguishable results were

190 seen for 2 independent panels of PPP2R5 family subunit siRNAs, and efficiency of siRNA  
191 knockdown was confirmed by qRT-PCR (**Figure 4–figure supplement 1C**).

192 To confirm that knockdown of all PPP2R5 subunits is necessary for cell cycle arrest, we  
193 repeated the experiment using pools of siRNA targeting 4 out of 5 PPP2R5 subunits (“minus  
194 one”). Again, and with the exception of PPP2R5B, cell cycle arrest was only observed when  
195 all subunits were knocked down together (**Figure 4C-D**). That depletion of PPP2R5B is neither  
196 sufficient (**Figure 4A-B**) nor required (**Figure 4C-D**) may reflect low expression of PPP2R5B  
197 in HeLas (Geiger et al., 2012), consistent with our qRT-PCR data (data not shown).  
198 Interestingly, near-identical results were previously reported from RPE1 cells (Lee et al.,  
199 2017).

200 Finally, knockdown of FMR1 and DPH7 (**Figure 4–figure supplement 2**) did not cause cell  
201 cycle arrest. Taken together, these observations therefore explain why efficient depletion of  
202 all PPP2R5 subunits is required to cause cell cycle arrest, and why Vif variants with impaired  
203 activity against any PPP2R5 subunit are defective for this phenotype.

#### 204 **Naturally occurring Vif variants phenocopy I31 and I128 point mutants**

205 The ability to cause G2/M cell cycle arrest is known to vary between naturally occurring HIV-  
206 1 Vif variants from clade B viruses (such as NL4-3 and HXB2), as well as viruses from other  
207 clades (Evans et al., 2018; Zhao et al., 2015). We therefore examined conservation of residues  
208 31, 33/34 and 128 across 2,171 clade B HIV-1 Vif sequences available from the Los Alamos  
209 National Laboratory Web Alignments database (**Figure 5A**). Similar results were obtained  
210 when 3,412 Vif sequences from all (any clade, including B) non-recombinant HIV-1 M groups  
211 viruses were considered (**Figure 5–figure supplement 1**).

212 Interestingly, residues 31 (I or V), 33 (K, G or R) and 128 (I or R, or less commonly L or V) all  
213 showed obvious polymorphism, with NL4-3 Vif encoding the commonest amino acids at  
214 positions 31 (I) and 128 (I), and the second commonest amino acid at position 33 (R). We  
215 therefore evaluated each of the common polymorphisms as single point mutations on a

216 background of NL4-3 Vif using our flow cytometric screen. Conservative substitutions in  
217 positions 31 and 128 partially impaired the ability of NL4-3 Vif to deplete PPP2R5B (I31V,  
218 I128V and I128L), whereas I128R resulted in more marked impairment (**Figure 5B**). Likewise,  
219 R33K, but not R33G, was well tolerated.

220 To evaluate these polymorphisms in their natural context, we tested Vif variants from two  
221 further clade B HIV-1 viruses in our flow cytometric assay: the HIV-1 reference strain HXB2  
222 (encoding 31V, 33G and 128I), and the macrophage-tropic patient isolate YU2 (encoding 31I,  
223 33G and 128R). As a control, we also included a Vif variant from the clade B transmitted  
224 founder virus CH470 (encoding 31I, 33K and 128I, similar to NL4-3 Vif) (**Figure 5C**).  
225 Consistent with the observed substitutions at residues 31, 33 and 128, HXB2 and YU2 Vif  
226 variants were markedly impaired for PPP2R5B depletion, whereas CH470 Vif was at least as  
227 active as NL4-3 Vif (**Figure 5D**). Depletion of APOBEC3G was preserved in each case (**Figure**  
228 **5—figure supplement 2**).

229 To further assess the function of these variants against other APOBEC3 and PPP2R5 family  
230 members, we again adopted a TMT-based functional proteomic approach (**Figure 6A**). As  
231 well as HXB2, YU2 and CH470 Vif variants, we included NL4-3 Vif variants with corresponding  
232 point mutations at positions 31 and 128 (I31V and I128R). In practice, since residue 127 is  
233 also polymorphic, and residues 127 and 128 together overlap a critical HIV splicing silence  
234 (Madsen and Stoltzfus, 2005), we combined I128R and R127Y mutations (RI127/128YR, as  
235 found in YU2 Vif and detailed in **Figure 6—figure supplement 1**). Finally, to test the  
236 combinatorial effect of mutations in residues 31 and 128, we included an NL4-3 Vif variant  
237 encoding both I31A and RI127/128YR (Vif AYR). CEM-T4 cells were transduced with the  
238 panel of Vif variants at an MOI of 3 (range 93.9-98.4% transduced cells), then subjected to  
239 whole cell proteome analysis after a further 48 hr.

240 In this experiment, we identified 8,265 proteins (**Figure 6—source data 1**), including 4 out of  
241 5 PPP2R5 family subunits (A/C/D/E) and 4 out of 7 APOBEC3 family members (B/C/D/G). As  
242 expected, CH470 Vif remained fully active against all PPP2R5 (**Figure 6B**) and APOBEC3

243 **(Figure 6C)** family subunits. Conversely, both YU2 and (in particular) HXB2 Vif variants were  
244 selectively impaired for PPP2R5 depletion **(Figure 6B)**. In each case, the differential pattern  
245 of PPP2R5 family subunit depletion mirrored the effects of corresponding point mutations of  
246 residue 31 (HXB2 and NL4-3 I31V, mainly affecting PPP2R5C-E) or 128 (YU2 and NL4-3  
247 RI127/128YR, mainly affecting PPP2R5A). Interestingly, whilst qualitatively similar to the I31A,  
248 I128A and I128D Vif mutants evaluated earlier, Vif variants with these naturally occurring  
249 polymorphisms were less severely impaired (compare **Figure 2C** with **Figure 6B**).

250 As a functional readout, we tested the ability of the same panel of Vif variants to cause cell  
251 cycle arrest. Consistent with previous reports (Evans et al., 2018; Zhao et al., 2015) and  
252 correlating with their impaired activity against PPP2R5 family subunits, HXB2 and NL4-3 I31V  
253 Vif variants were unable to cause cell cycle arrest **(Figure 6D and Figure 6–figure**  
254 **supplement 3)**. Similarly, the potency of YU2 and NL4-3 RI127/128YR Vif variants was  
255 greatly reduced, but not abolished. Naturally occurring polymorphisms at residues 31 and 128  
256 therefore modulate the ability of Vif to deplete PPP2R5 family subunits, and explain why some  
257 HIV-1 Vif variants are unable to cause cell cycle arrest.

### 258 **Combined I31 and I128 mutations abolish PPP2R5 family subunit depletion and rarely** 259 **occur in nature**

260 Unlike individual mutations of residues 31 or 128, combined I31A and RI127/128YR mutations  
261 in NL4-3 Vif (Vif AYR) completely abolished the depletion of all PPP2R5 family subunits in our  
262 proteomic analysis **(Figure 6B)**, without affecting the depletion of APOBEC3 family proteins  
263 **(Figure 6C)**. Since PPP2R5B was not quantitated, we confirmed that Vif AYR was also unable  
264 to deplete this subunit by flow cytometry **(Figure 6–figure supplement 2A-B)**. As expected,  
265 Vif AYR was also unable to cause cell cycle arrest **(Figure 6D)**.

266 We sought to confirm these results in the context of viral infection by introducing the same  
267 mutations into the NL4-3-based HIV-AFMACS molecular clone (Naamati et al., 2019). This  
268 Env-deficient (single round) reporter virus encodes a SBP- $\Delta$ LNGFR cell surface streptavidin-

269 binding affinity tag, allowing facile one-step selection of infected cells with streptavidin-  
270 conjugated magnetic beads (Antibody-Free Magnetic Cell Sorting, AFMACS) (Matheson et  
271 al., 2014). To enable analysis of cell cycle without confounding by Vpr, a Vpr-deficient ( $\Delta$ Vpr)  
272 background was used.

273 To assess the function of Vif AYR against APOBEC3 and PPP2R5 family members during  
274 viral infection, we first adopted a TMT-based functional proteomic approach to compare mock-  
275 infected cells with cells infected with  $\Delta$ Vpr-Vif WT,  $\Delta$ Vpr- $\Delta$ Vif or  $\Delta$ Vpr-Vif AYR viruses (**Figure**  
276 **7A**). CEM-T4s were infected at an MOI of 0.5 (range 29.3-48.7% infected cells), purified using  
277 AFMACS after 48 hr (range 93.3-96.6% infected cells; **Figure 7–figure supplement 1A-B**),  
278 then subjected to whole cell proteome analysis.

279 In this experiment, we identified 6,297 proteins (**Figure 7–source data 1**), including 4 out of  
280 5 PPP2R5 family subunits (A/C/D/E) but only 1 out of 7 APOBEC3 family member (C). As  
281 expected,  $\Delta$ Vpr-Vif WT virus (**Figure 7B**, left panel) but not  $\Delta$ Vpr- $\Delta$ Vif virus (**Figure 7B**, middle  
282 panel) was able to deplete both APOBEC3C and PPP2R5 family proteins. Conversely,  $\Delta$ Vpr-  
283 Vif AYR virus (**Figure 7B**, right panel) retained the ability to deplete APOBEC3C, but was  
284 completely inactive against PPP2R5 family proteins. As a control, the Nef and Vpu target CD4  
285 was similarly downregulated by each virus (Guy et al., 1987; Willey et al., 1992). To confirm a  
286 functional effect on PP2A, we then used these viruses to infect CEM-T4 T cells, and measured  
287 their effect on cell cycle progression. Again, only  $\Delta$ Vpr-Vif WT virus, but not  $\Delta$ Vpr- $\Delta$ Vif or  $\Delta$ Vpr-  
288 Vif AYR viruses, was able to induce G2/M cell cycle arrest (**Figure 7C**).

289 If the ability of Vif to antagonise PP2A is maintained by selection pressure *in vivo*,  
290 combinations of unfavourable (less active against PPP2R5A-E) mutations in residues 31 and  
291 128 (abolishing all PPP2R5 family subunit depletion) should be rare amongst naturally  
292 occurring HIV-1 Vif variants. Furthermore, if effects on viral fitness are synergistic, such  
293 combinations should occur less frequently than predicted by chance. We therefore examined  
294 covariance of polymorphisms of residues 31 and 128 across the clade B HIV-1 Vif sequences

295 available from the Los Alamos National Laboratory Web Alignments database (**Figure 7D**;  
296 same 2,171 sequences as **Figure 5A**).

297 Amongst these sequences, 21.8% encode 31V (less active) and 33.6% encode R128 (less  
298 active). By chance, combinations of 31V and 128R would therefore be expected in 7.3% of  
299 sequences. Conversely, this combination is observed in only 5.8% of sequences. Whilst this  
300 difference appears modest, the association between these polymorphisms is highly  
301 statistically significant ( $p=0.0003$ , Fisher's exact test, **Figure 7–figure supplement 2A**, left  
302 panel). We observed similar, significant under-representation when we limited our analysis to  
303 clade B viruses encoding combinations of 31I/V and 128I/R (**Figure 7–figure supplement**  
304 **2A**, right panel), or extended it to include Vif sequences from all (any clade, including B) non-  
305 recombinant HIV-1 M groups viruses (**Figure 7–figure supplement 2B-C**; same 3,412  
306 sequences as **Figure 5–figure supplement 1**).

307 To distinguish functional covariance of these residues from background linkage disequilibrium  
308 (co-inheritance of polymorphisms from a common ancestor), we constructed phylogenetic  
309 trees of all Vif variants based on Vif (**Figure 7E**) or Nef, Gag or Env (**Figure 7–figure**  
310 **supplement 3A**). Regardless of the viral protein used, viruses encoding different  
311 combinations of 31/128 polymorphisms were scattered throughout the phylogeny, with no  
312 obvious founder effect. Again, similar results were seen when we extended our analysis to  
313 include Vif sequences from all (any clade, including B) non-recombinant HIV-1 M groups  
314 viruses (**Figure 7–figure supplement 3B**).

315 Taken together, these data therefore provide evidence of a functional interaction between  
316 residues 31/128, and suggest significant *in vivo* selection pressure to maintain the ability of  
317 Vif to antagonise PP2A.

## 318 Discussion

319 The study of cellular proteins and processes targeted by HIV has provided critical insights into  
320 the host-virus interaction. Typically, these targets have been identified piecemeal, using  
321 candidate approaches. In contrast, we have recently adopted unbiased proteomic approaches  
322 to identify novel substrates of HIV accessory proteins (Greenwood et al., 2016; Greenwood et  
323 al., 2019; Matheson et al., 2015; Naamati et al., 2019). A key challenge is now to determine  
324 the biological significance of these targets for HIV-infected cells: both *whether* they are  
325 important, and *why* they are important.

326 In this study, we sought to address these questions for Vif targets PPP2R5A-E. By  
327 demonstrating that depletion of PPP2R5 family subunits by Vif is separable from targeting of  
328 APOBEC3 family proteins, we formally prove that PP2A antagonism is neither required for,  
329 nor an epiphenomenon of, APOBEC3 family protein depletion. Combined with evidence of  
330 conservation across HIV-1 viruses and the broader lentiviral lineage (Greenwood et al., 2016),  
331 these observations provide strong genetic evidence for the importance of PPP2R5 depletion  
332 by Vif *in vivo*.

333 Strikingly, the critical residues for PPP2R5 depletion identified in our screen included several  
334 previously determined to be important for Vif-dependent cell cycle arrest in other, independent  
335 studies (31, 33, 44) (DeHart et al., 2008; Zhao et al., 2015). As well as residues required for  
336 CUL5 complex assembly (114 and 145), several additional residues (14, 36, 48 and 40) were  
337 implicated in the same studies. Amongst these, a K36A point mutant showed an intermediate  
338 effect on PPP2R5B depletion in our screen (**Figure 1–figure supplement 2A**). The other  
339 residues were not tested, because we focussed on regions of Vif not known to be important  
340 for depletion of APOBEC3 family proteins, and residues with solvent-exposed side chains  
341 unlikely to lead to structural disruption.

342 We were initially puzzled because some Vif point mutants were markedly impaired in their  
343 ability to cause cell cycle arrest, yet retained the ability to deplete at least some PPP2R5 family



344 subunits. Furthermore, the ability of Vif to cause cell cycle arrest did not appear to correlate  
345 with depletion of any one, specific PPP2R5 subunit. In fact, because efficient depletion of all  
346 PPP2R5 subunits is required to halt cell cycle progression, these are not paradoxes at all.  
347 This same model also suggests explanations for two related phenomena.

348 First, expression of HIV-1 Vif in mouse or COS cells results in depletion of PPP2R5D, but  
349 does not cause cell cycle arrest (Evans et al., 2018). As with Vif point mutants and naturally  
350 occurring variants in human cells, it seems likely that another PPP2R5 subunit escapes  
351 depletion in these species-mismatched cells. Second, we previously found the ability of Vif to  
352 antagonise at least some PPP2R5 subunits to be widely conserved (Greenwood et al., 2016),  
353 but the ability to cause cell cycle arrest is variable amongst HIV-1 Vif variants (Evans et al.,  
354 2018; Zhao et al., 2015). Since efficient depletion of all expressed PPP2R5 subunits is  
355 required to cause cell cycle arrest, escape of even a single subunit allows cell cycle to  
356 progress.

357 Amongst all HIV-1 Vif sequences analysed here, the commonest single combination or  
358 residues at positions 31 and 128 was 31I/128I, accounting for approximately 30% of Vif  
359 variants. Most of these sequences also encode 33R or 33K and, like NL4-3 and CH470 Vif,  
360 are therefore expected to efficiently degrade PPP2R5A-E, and cause cell cycle arrest.  
361 Conversely, only approximately 5% encode 31V/128R, and are therefore expected to be  
362 severely impaired for PPP2R5A-E degradation. It is likely that most of the remaining Vif  
363 variants, like YU2 and HXB2, are active against at least some PPP2R5 family members, but  
364 may be variably attenuated in their ability to cause cell cycle arrest. Interestingly, naturally  
365 occurring Vif variants have also been shown to exhibit a spectrum of activity against  
366 APOBEC3 family proteins, including variants which fail to neutralise one or more APOBEC3  
367 family proteins (Binka et al., 2012b; Iwabu et al., 2010; Mulder et al., 2008; Simon et al.,  
368 2005a).

369 Mechanistically, hyperphosphorylation of aurora kinase substrates is expected to contribute  
370 significantly to Vif-dependent cell cycle arrest (Foley et al., 2011). Nonetheless, PP2A is a



371 “master regulator” of cell cycle (Wlodarchak and Xing, 2016), and depletion of PPP2R5A-E by  
372 Vif causes widespread remodelling of the phosphoproteome, implying activation of multiple  
373 kinases (Greenwood et al., 2016). Consistent with this, Vif-dependent cell cycle arrest was  
374 previously shown to require TP53 (Izumi et al., 2010), and several studies have identified  
375 upstream regulation of TP53 by PP2A in different systems (Ajay et al., 2010; Li et al., 2002;  
376 Yang and Phiel, 2010).

377 Many RNA and DNA viruses cause and are thought to benefit from cell cycle arrest (Bagga  
378 and Bouchard, 2014). In HIV infection, G2/M cell cycle arrest was first attributed to Vpr (He et  
379 al., 1995; Jowett et al., 1995; Rogel et al., 1995), which remains better known for this function.  
380 Early studies suggested a positive effect of G2/M arrest on transcription from the HIV-1 LTR  
381 (Goh et al., 1998; Gummuluru and Emerman, 1999), but more recent results have raised the  
382 possibility that cell cycle arrest may be secondary to another Vpr-dependent process, such as  
383 antagonism of innate immunity (Laguetta et al., 2014). Nonetheless, targeting of the same cell  
384 biological process by multiple viral accessory proteins is strong *a priori* evidence of biological  
385 importance *in vivo*.

386 Functional redundancy with Vpr may also help explain why Vif-dependent cell cycle arrest is  
387 not more strictly conserved across naturally occurring HIV-1 Vif variants. In addition, key  
388 polymorphic residues which regulate PPP2R5 antagonism may be subject to balancing  
389 selection pressures. First, the requirement to maintain the Exonic Splicing Silencer of Vpr  
390 (ESSV) at the RNA level limits the sequence variability tolerated at position 128 (Madsen and  
391 Stoltzfus, 2005). Second, polymorphisms at position 31 also regulate antagonism of  
392 APOBEC3H (Zhao et al., 2015). Indeed, at least in some cases, the abilities of Vif to  
393 antagonise APOBEC3H and cause cell cycle arrest were found to be mutually exclusive.

394 Vif-dependent cell cycle arrest correlates with viral cytopathicity (Evans et al., 2018; Sakai et  
395 al., 2006), and was reported to enhance HIV-1 replication *in vitro* in a previous study using  
396 chimeric HXB2/NL4-3 Vif variants (Izumi et al., 2010). Classic experiments comparing WT and  
397 Vif-deficient viruses in permissive cells often examined HXB2 (Gabuzda et al., 1992) or YU2

398 (Gaddis et al., 2003) viruses. Since these Vif variants are shown here to be attenuated in their  
399 activity against different PPP2R5 subunits, manifested by a reduced ability to cause cell cycle  
400 arrest, it is likely that these studies failed to fully capture the effects of PP2A antagonism on  
401 viral infection.

402 As importantly, the ability to assess APOBEC3-independent effects of Vif on viral fitness *in*  
403 *vitro* has hitherto been limited to comparisons between WT and Vif-deficient viruses on an  
404 APOBEC3-negative background, such as the CEM-SS cell line. In contrast, the point mutants  
405 identified in this study maintain the ability to antagonise APOBEC3 family proteins, and will  
406 therefore allow the assessment of Vif-dependent PP2A antagonism by the community in a full  
407 range of cell types, including primary and myeloid cells, as well as providing a mechanistic  
408 framework to interpret the results.

## 409 Materials and Methods

### 410 Key resources table

| Reagent type (species) or resource | Designation                                         | Source or reference           | Identifiers         | Additional information                                              |
|------------------------------------|-----------------------------------------------------|-------------------------------|---------------------|---------------------------------------------------------------------|
| cell line ()                       | CEM-T4 T cells (CEM-T4s)                            | NIH AIDS Reagent Program      | Cat. #: 117         | Also known as CEM CD4+ cells                                        |
| cell line ()                       | HeLa cells (HeLas)                                  | Lehner laboratory stocks      | RRID: CVCL_0030     |                                                                     |
| cell line ()                       | HEK 293T cells (293Ts)                              | Lehner laboratory stocks      | RRID: CVCL_0063     |                                                                     |
| antibody                           | Mouse monoclonal BV421-conjugated anti-CD4          | BioLegend                     | Cat. #: 317434      | Flow cytometry                                                      |
| antibody                           | Mouse monoclonal PE-conjugated anti-CD4             | BD Biosciences                | Cat. #: 561843      | Flow cytometry                                                      |
| antibody                           | Mouse monoclonal AF647-conjugated anti-LNGFR        | BioLegend                     | Cat. #: 345114      | Flow cytometry                                                      |
| antibody                           | Mouse monoclonal FITC-conjugated anti-LNGFR         | BioLegend                     | Cat. #: 345103      | Flow cytometry                                                      |
| antibody                           | Mouse monoclonal DyLight 650-conjugated anti-HA tag | abcam                         | Cat. #: ab117515    | Flow cytometry                                                      |
| antibody                           | Rabbit monoclonal anti-PPP2R5D                      | abcam                         | Cat. #: ab188323    | Immunoblot                                                          |
| antibody                           | Mouse monoclonal anti-HIV-1 Vif                     | NIH AIDS Reagent Program      | Cat. #: 6459        | Immunoblot                                                          |
| antibody                           | Rabbit polyclonal anti-FMR1 (FMRP)                  | Cell Signalling Technology    | Cat. #: 4317        | Immunoblot                                                          |
| antibody                           | Rabbit polyclonal anti-DPH7                         | Atlas Antibodies              | Cat. #: HPA022911   | Immunoblot                                                          |
| antibody                           | Mouse monoclonal anti- $\beta$ -actin               | Sigma                         | Cat. #: A5316       | Immunoblot                                                          |
| antibody                           | Mouse monoclonal anti-p97 (VCP)                     | Abcam                         | Cat. #: ab11433     | Immunoblot                                                          |
| antibody                           | Rabbit polyclonal anti-total AURKB                  | Cell Signalling Technology    | Cat. #: 3094        | Immunoblot                                                          |
| antibody                           | Rabbit monoclonal anti-phospho-AURK                 | Cell Signalling Technology    | Cat. #: 2914        | Immunoblot                                                          |
| recombinant DNA reagent            | pHRSIN-SE-P2A-SBP- $\Delta$ LNGFR-W                 | (Matheson et al., 2014)       | N/A                 | Used as a control and to express codon optimised Vif variants       |
| recombinant DNA reagent            | pHRSIN-SE-W-pSV40-puro                              | (van den Boomen et al., 2014) | N/A                 | Used as a control                                                   |
| recombinant DNA reagent            | pHRSIN-S-W-pGK-puro                                 | (Greenwood et al., 2016)      | N/A                 | Used to express HA-tagged PPP2R5B and APOBEC3G                      |
| recombinant DNA reagent            | HIV-AFMACS                                          | (Naamati et al., 2019)        | GenBank: MK435310.1 | pNL4-3- $\Delta$ Env-Nef-P2A-SBP- $\Delta$ LNGFR proviral construct |
| commercial assay or kit            | NEBuilder HiFi DNA Assembly Cloning Kit             | NEB                           | Cat. #: E5520S      |                                                                     |

|                         |                                               |                             |                   |                                                                                                                                               |
|-------------------------|-----------------------------------------------|-----------------------------|-------------------|-----------------------------------------------------------------------------------------------------------------------------------------------|
| commercial assay or kit | Fugene 6 Transfection Reagent                 | Promega                     | Cat. #E2691       |                                                                                                                                               |
| commercial assay or kit | Lipofectamine RNAiMAX Transfection Reagent    | Invitrogen                  | Cat. #: 18080044  |                                                                                                                                               |
| chemical compound, drug | Lenti-X Concentrator                          | Clontech                    | Cat. #: 631232    |                                                                                                                                               |
| commercial assay or kit | Dynabeads Biotin Binder                       | Invitrogen                  | Cat. #: 11047     |                                                                                                                                               |
| commercial assay or kit | S-Trap micro MS Sample Preparation Kit        | Protifi                     | Cat. #: C02-micro |                                                                                                                                               |
| commercial assay or kit | TMT10plex Isobaric Label Reagent Set          | Thermo Scientific           | Cat. #: 90110     |                                                                                                                                               |
| commercial assay or kit | Superscript III First-Strand Synthesis System | Invitrogen                  | Cat. #: 18080051  |                                                                                                                                               |
| software, algorithm     | PyMOL Molecular Graphics System, Version 2.0  | Schrödinger                 | RRID:SCR_006054   | <a href="https://www.schrodinger.com/py-mol">https://www.schrodinger.com/py-mol</a>                                                           |
| software, algorithm     | Proteome Discoverer 2.1                       | Thermo Scientific           | RRID:SCR_014477   |                                                                                                                                               |
| software, algorithm     | R v.3.5.3                                     | (R Core Team, 2019)         | RRID:SCR_001905   | <a href="https://www.R-project.org/">https://www.R-project.org/</a>                                                                           |
| software, algorithm     | limma                                         | (Ritchie et al., 2015)      | RRID:SCR_010943   | <a href="https://bioconductor.org/packages/limma/">https://bioconductor.org/packages/limma/</a>                                               |
| software, algorithm     | WebLogo                                       | (Crooks et al., 2004)       | RRID:SCR_010236   | <a href="http://weblogo.berkeley.edu">http://weblogo.berkeley.edu</a>                                                                         |
| software, algorithm     | seqinr                                        | (Charif and Lobry, 2007)    | N/A               | <a href="https://cran.r-project.org/web/packages/seqinr/">https://cran.r-project.org/web/packages/seqinr/</a>                                 |
| software, algorithm     | ggplot2                                       | (Wickham, 2009)             | RRID:SCR_014601   | <a href="https://ggplot2.tidyverse.org">https://ggplot2.tidyverse.org</a>                                                                     |
| software, algorithm     | ggtree                                        | (Yu et al., 2018)           | N/A               | <a href="https://bioconductor.org/packages/release/bioc/html/ggtree.html">https://bioconductor.org/packages/release/bioc/html/ggtree.html</a> |
| software, algorithm     | Clustal Omega                                 | (Sievers and Higgins, 2014) | RRID:SCR_001591   | <a href="https://www.ebi.ac.uk/Tools/msa/clustalo/">https://www.ebi.ac.uk/Tools/msa/clustalo/</a>                                             |
| software, algorithm     | Prism 7.0                                     | GraphPad                    | RRID:SCR_002798   |                                                                                                                                               |

411

## 412 Cell culture

413 CEM-T4 T cells (Foley et al., 1965) were obtained directly (< 1yr) from the AIDS Reagent  
414 Program, Division of AIDS, NIAD, NIH (Dr J. P. Jacobs), and cultured at a density of  $5 \times 10^5$  to  
415  $2 \times 10^6$  cells/ml in RPMI supplemented with 10% FCS, 100units/ml penicillin and 0.1 mg/ml  
416 streptomycin at 37°C in 5% CO<sub>2</sub>. HeLa cells and HEK 293T cells (authenticated by STR  
417 profiling (Menzies et al., 2018; Miles et al., 2017)) were obtained from Lehner laboratory stocks  
418 and cultured in DMEM supplemented with 10% fetal calf serum (FCS), 100 units/ml penicillin

419 and 0.1 mg/ml streptomycin at 37 °C in 5% CO<sub>2</sub>. All cells were regularly screened and  
420 confirmed to be mycoplasma negative (Lonza MycoAlert).

#### 421 **Vectors for transgene expression**

422 Sequences for Vif variants from NL4-3 (AF324493.2) , HXB2 (K03455.1), YU2 (GenBank:  
423 M93258.1) and CH470 (JX972238-JX972249) viruses were obtained from GenBank. The  
424 CH470 transmitted founder (TF) Vif sequence was inferred as previously described (Fenton-  
425 May et al., 2013; Liu et al., 2013; Parrish et al., 2013).

426 For co-expression of codon optimised Vif variants with EGFP, gBlocks (IDT) encoding NL4-3,  
427 HXB2, YU2 or CH470 Vif were incorporated into pHRSIN-SE-P2A-SBP-ΔLNGFR-W  
428 (Matheson et al., 2014) in place of SBP-ΔLNGFR by Gibson assembly between XhoI/KpnI  
429 sites (generating pHRSIN-SE-P2A-Vif-W vectors). In these vectors, Vif variants are expressed  
430 from the *Friend spleen focus-forming virus* (SFFV) promoter as EGFP-P2A-Vif, downstream  
431 of EGFP and a 'self-cleaving' *Porcine teschovirus-1 2A* (P2A) peptide.

432 Complete sequences for all gBlocks are included in **Supplementary file 1** (Codon-optimised  
433 Vif variants synthesised as gBlocks). Codon optimisation was conducted using the IDT codon  
434 optimisation tool, and sequences were verified by Sanger sequencing (Source BioScience).

435 The parental vector (in which EGFP and the SBP-ΔLNGFR cell surface selection marker are  
436 expressed from the SFFV promoter as EGFP-SBP-ΔLNGFR) was used here as a control.  
437 Where indicated, pHRSIN-SE-W-pSV40-puro (in which EGFP is expressed from the SFFV  
438 promoter as a single transgene) was used as an alternative control (van den Boomen et al.,  
439 2014).

440 To generate stable 293T cell lines for our flow cytometric screen, N-terminal 4xHA-tagged  
441 PPP2R5B and C-terminal 4xHA-tagged APOBEC3G were expressed using pHRSIN-S-W-  
442 pGK-puro exactly as previously described (Greenwood et al, 2016).

#### 443 **Vif mutant library construction**

444 To generate a library of Vif point mutants, a PCR and Gibson assembly-based approach was  
445 used to modify codon-optimised NL4-3 Vif directly in pHRSIN-SE-P2A-Vif-W (**Figure 1–figure**  
446 **supplement 1A**).

447 Briefly, forward and reverse primers encoding each point mutation were designed with ~15 bp  
448 fully complementary flanking sequences. These mutation-specific primers were used in  
449 pairwise PCR reactions in conjunction with common primers complementary to the vector  
450 backbone, which was cut between XhoI/KpnI sites. The two PCR products were then  
451 assembled into the vector using the NEBuilder HiFi DNA Assembly Master Mix (NEB).

452 Sequences for all primers used are tabulated in **Supplementary file 1** (PCR primers for Vif  
453 mutant library construction). All sequences were verified by Sanger sequencing (Source  
454 BioScience).

#### 455 **HIV-1 molecular clones**

456 HIV-AFMACS (pNL4-3- $\Delta$ Env-Nef-P2A-SBP- $\Delta$ LN<sub>G</sub>FR; GenBank: MK435310.1) has been  
457 previously described (Naamati et al., 2019). To introduce mutations in the native NL4-3 Vif  
458 coding sequence, the same PCR and Gibson assembly-based approach developed for Vif  
459 mutant library construction was used, cutting the vector backbone between AgeI/SalI sites.  
460 Where indicated, multiple mutations were introduced sequentially.

461 To generate  $\Delta$ Vpr-Vif WT virus (lacking Vpr expression, but encoding WT Vif), a silent  
462 mutation was introduced into Vif codon 173 (AGA>AGG; both encoding Arg), eliminating the  
463 Vpr start codon in the +2 reading frame. Additional point mutations were introduced to  
464 generate  $\Delta$ Vpr-Vif AYR virus (lacking Vpr expression, but encoding Vif with I31A and  
465 R127Y/I128R mutations) and  $\Delta$ Vpr- $\Delta$ Vif virus (lacking Vpr expression, and encoding two  
466 premature stop codons after the final in-frame start codon in the Vif open reading frame).

467 Final Vif coding sequences for each virus are included in **Supplementary file 1** (Vif coding  
468 sequences in HIV-AFMACS viruses). Sequences were verified by Sanger sequencing (Source  
469 BioScience).

470 **Transient transfection**

471 For the flow cytometric screen, 293T cells stably expressing HA-tagged PPP2R5B or  
472 APOBEC3G were transfected with 200 ng/well control or Vif expression vector in 24-well  
473 plates using FuGENE 6 (Promega). After 36 hr, cells were harvested with trypsin-EDTA and  
474 analysed by flow cytometry.

475 **siRNA transfection**

476 For RNAi-mediated knockdown, HeLa cells were transfected with custom siRNA duplexes  
477 (Sigma) using transfected using Lipofectamine RNAiMAX (Invitrogen) according to the  
478 manufacturer's instructions.

479 Briefly,  $2 \times 10^5$  cells/well were seeded in 6-well plates 24 hr prior to transfection with a total of  
480 50 pmol/well siRNA (individual or pooled). Knockdown was verified by real-time PCR or  
481 immunoblot 24 hr post-transfection, and cells were re-seeded prior to cell cycle analysis 48 hr  
482 post-transfection (target 50% confluency).

483 All siRNA target sequences used are tabulated in **Supplementary file 1** (Target sequences  
484 for RNAi). Cells not subjected to knockdown were transfected with MISSION siRNA Universal  
485 Negative Control #1 (Sigma) at equivalent concentrations.

486 **Viral stocks**

487 VSVg-pseudotyped lentivector stocks were generated by co-transfection of 293Ts with  
488 pHRSIN-based lentivector, p8.91 and pMD.G at a ratio of 2:1:1 ( $\mu$ g) DNA and a DNA:FuGENE  
489 6 ratio of 1  $\mu$ g:3  $\mu$ l. Media was changed the next day and viral supernatants harvested and  
490 filtered (0.45  $\mu$ m) at 48 hr prior to concentration with Lenti-X Concentrator (Clontech) and  
491 storage at -80 °C.

492 VSVg-pseudotyped HIV-AFMACS viral stocks were generated by co-transfection of 293Ts  
493 with HIV-AFMACS molecular clones and pMD.G at a ratio of 9:1 ( $\mu$ g) DNA and a

494 DNA:FuGENE 6 ratio of 1 µg:6 µl. Viral supernatants were harvested, filtered, concentrated  
495 and stored as per pHR SIN-based lentivector stocks.

496 Lentivector/viral stocks were titrated by transduction/infection of known numbers of relevant  
497 target cells with known volumes of stocks under standard experimental conditions, followed  
498 by flow cytometry for EGFP (GFP-expressing lentivectors) or SBP-ΔLNGFR and CD4 (HIV-  
499 AFMACS viruses) at 48 hr to identify the fraction of transduced/infected cells (f) containing at  
500 least one transcriptionally active provirus (EGFP positive or SBP-ΔLNGFR positive/CD4 low).  
501 The number of transducing/infectious units present was then calculated by assuming a  
502 Poisson distribution (where  $f = 1 - e^{-\text{MOI}}$ ). Typically, a dilution series of each stock was tested,  
503 and titre determined by linear regression of  $-\ln(1-f)$  on volume of stock.

#### 504 **Transductions and infections**

505 CEM-T4s or HeLas were transduced or infected by spinoculation at 800 g for 1 hr in a non-  
506 refrigerated benchtop centrifuge in complete media supplemented with 10 mM HEPES.

#### 507 **Antibody-Free Magnetic Cell Sorting (AFMACS)**

508 AFMACS-based selection of CEM-T4s using the streptavidin-binding SBP-ΔLNGFR affinity  
509 tag was carried out essentially as previously described (Matheson et al., 2014; Naamati et al.,  
510 2019). Briefly,  $1 \times 10^6$  CEM-T4s/condition were infected with VSV-g pseudotyped HIV-AFMACS  
511 viruses at an MOI of 0.5. 48 hr post-infection, washed cells were resuspended in incubation  
512 buffer (IB; Hank's balanced salt solution, 2% dialysed FCS, 1x RPMI Amino Acids Solution  
513 (Sigma), 2 mM L-glutamine, 2 mM EDTA and 10 mM HEPES) at  $10^7$  cells/ml and incubated  
514 with Dynabeads Biotin Binder (Invitrogen) at a bead-to-total cell ratio of 4:1 for 30 min at 4 °C.  
515 Bead-bound cells expressing SBP-ΔLNGFR were selected using a DynaMag-2 magnet  
516 (Invitrogen), washed to remove uninfected cells, then released from the beads by incubation  
517 in complete RPMI with 2 mM biotin for 15 min at room temperature (RT). Enrichment was  
518 assessed by flow cytometry pre- and post-selection.

#### 519 **Proteomics**



520 Sample preparation

521 For TMT-based whole cell proteomic analysis of transduced or infected CEM-T4s, washed  
522 cell pellets were lysed in 50 mM HEPES pH 8 with 5% SDS followed by 10 min (30 sec on/off)  
523 sonication in a Bioruptor Pico sonicator (Diagenode) at 18 °C. Lysates were quantified by BCA  
524 assay (Thermo Scientific) and 25 µg (transduced CEM-T4s, experiments 1-2) or 10 µg  
525 (infected and AFMACS-selected CEM-T4s, experiment 3) total protein/condition used for  
526 further analysis.

527 Sample volumes were equalised with lysis buffer and proteins reduced and alkylated by  
528 addition of 10mM TCEP and 20mM iodoacetamide followed by incubation at RT for 30 min,  
529 protected from light. Samples were then processed using S-Trap micro columns (Protifi). To  
530 each sample 10% v/v H<sub>3</sub>PO<sub>4</sub> was added and samples mixed by vortexing briefly. 6 volumes  
531 of 90% MeOH HEPES pH 7.1 (loading buffer) were then added and pipette-mixed before  
532 loading onto columns using a vacuum manifold.

533 Samples were then washed with 4x 150 µl loading buffer. A 1:25 enzyme:protein ratio of  
534 LysC/trypsin mix (Promega) was added to each column in 30 µl of 50 mM HEPES pH 8 with  
535 0.1% sodium deoxycholate (SDC). Columns were placed into microcentrifuge tubes and  
536 incubated for 6 hr at 37 °C in a Thermomixer S (Eppendorf) without shaking. Open tubes of  
537 water were placed in empty positions and the Thermomixer lid used to minimise evaporation.

538 After incubation, peptides were eluted in three stages: 40 µl 10 mM HEPES pH 8; 35 µl 0.2%  
539 formic acid (FA); then 35 µl 0.2% FA in 50% Acetonitrile (ACN). Samples were dried for a  
540 short period in a vacuum centrifuge to evaporate ACN and then acidified with FA to precipitate  
541 SDC. Samples were then made up to ~100 µl with water, then 600 µl ethyl acetate was added  
542 and samples vortexed vigorously. After centrifugation at 15,000 g for 5 min the lower phase  
543 (containing peptides) was retained and the upper phase (containing SDC and ethyl acetate)  
544 was discarded.

545 After drying fully in a vacuum centrifuge, samples were resuspended in 21  $\mu$ l 100 mM HEPES  
546 pH 8, to which was added 0.2 mg of TMT label dissolved in 9  $\mu$ l ACN. After 1 hr incubation at  
547 RT samples were analysed by LCMS to ensure complete labelling, then pooled and dried by  
548 ~50% in a vacuum centrifuge. The pooled sample was made up to ~1ml in a final concentration  
549 of 0.1% trifluoroacetic acid (TFA) and the pH was adjusted to <2 with FA. The samples were  
550 then subjected to C18 SPE clean-up using 500 mg Sep-Pak tC18 cartridges (Waters).  
551 Columns were wetted with 1 ml ACN and equilibrated with 3 ml 0.1% TFA before loading the  
552 sample, washing with 2 ml 0.1% TFA and eluting with 250  $\mu$ l 40% ACN, 250  $\mu$ l 80% ACN and  
553 250  $\mu$ l 80% ACN. The eluates were dried in a vacuum centrifuge.

#### 554 Off-line high pH reversed-phase (HpRP) peptide fractionation

555 HpRP fractionation was conducted on an Ultimate 3000 UHPLC system (Thermo Scientific)  
556 equipped with a 2.1 mm  $\times$  15 cm, 1.7  $\mu$ m Kinetex EVO C18 column (Phenomenex). Solvent  
557 A was 3% ACN, Solvent B was 100% ACN, and solvent C was 200 mM ammonium formate  
558 (pH 10). Throughout the analysis solvent C was kept at a constant 10%. The flow rate was  
559 400  $\mu$ l/min and UV was monitored at 280 nm. Samples were loaded in 90% A for 10 min before  
560 a gradient elution of 0–10% B over 10 min (curve 3), 10-34% B over 21 min (curve 5), 34-50%  
561 B over 5 min (curve 5) followed by a 10 min wash with 90% B. 15 sec (100  $\mu$ l) fractions were  
562 collected throughout the run. Peptide-containing fractions were orthogonally recombined into  
563 24 (transduced CEM-T4s, experiments 1-2) or 12 (infected and AFMACS-selected CEM-T4s,  
564 experiment 3) fractions, dried in a vacuum centrifuge and stored at -20  $^{\circ}$ C prior to analysis.

#### 565 Mass spectrometry

566 Data were acquired on an Orbitrap Fusion mass spectrometer (Thermo Scientific) coupled to  
567 an Ultimate 3000 RSLC nano UHPLC (Thermo Scientific). Solvent A was 0.1% FA and solvent  
568 B was ACN/0.1% FA. HpRP fractions were resuspended in 20  $\mu$ l 5% DMSO 0.5% TFA and  
569 10  $\mu$ l injected. Fractions were loaded at 10  $\mu$ l/min for 5 min on to an Acclaim PepMap C18

570 cartridge trap column (300  $\mu\text{m}$   $\times$  5 mm, 5  $\mu\text{m}$  particle size) in 0.1% TFA. After loading, a linear  
571 gradient of 3–32% B over 3 hr was used for sample separation over a column of the same  
572 stationary phase (75  $\mu\text{m}$   $\times$  50 cm, 2  $\mu\text{m}$  particle size) before washing with 90% B and re-  
573 equilibration. An SPS/MS3 acquisition was used for all samples and was run as follows. MS1:  
574 quadrupole isolation, 120,000 resolution,  $5 \times 10^5$  AGC target, 50 msec maximum injection time,  
575 ions injected for all parallelisable time. MS2: quadrupole isolation at an isolation width of  $m/z$   
576 0.7, CID fragmentation (NCE 35) with the ion trap scanning out in rapid mode from  $m/z$  120,  
577  $8 \times 10^3$  AGC target, 70 msec maximum injection time, ions accumulated for all parallelisable  
578 time. In synchronous precursor selection mode the top 10 MS2 ions were selected for HCD  
579 fragmentation (65NCE) and scanned out in the orbitrap at 50,000 resolution with an AGC  
580 target of  $2 \times 10^4$  and a maximum accumulation time of 120 msec, ions were not accumulated  
581 for all parallelisable time. The entire MS/MS/MS cycle had a target time of 3 sec. Dynamic  
582 exclusion was set to  $\pm 10$  ppm for 90 sec, MS2 fragmentation was triggered at  $5 \times 10^3$  ions.

### 583 Data processing

584 Spectra were searched using Mascot within Proteome Discoverer 2.2 in two rounds. The first  
585 search was against the UniProt human reference proteome, a custom HIV proteome (adjusted  
586 to include the exact protein coding sequences used) and a compendium of common  
587 contaminants (Global Proteome Machine). The second search took all unmatched spectra  
588 from the first search and searched against the human trEMBL database. The following search  
589 parameters were used. MS1 tol: 10 ppm; MS2 tol: 0.6 Da; fixed mods: carbamidomethyl (C)  
590 and TMT (N-term, K); var mods: oxidation (M); enzyme: trypsin (/P). MS3 spectra were used  
591 for reporter ion based quantitation with a most confident centroid tolerance of 20 ppm. PSM  
592 FDR was calculated using Mascot percolator and was controlled at 0.01% for 'high' confidence  
593 PSMs and 0.05% for 'medium' confidence PSMs. Normalisation was automated and based  
594 on total s/n in each channel.

595 All proteomics datasets described in this study will be deposited to the ProteomeXchange  
596 consortium (accessible at: <http://proteomecentral.proteomexchange.org>) prior to publication  
597 and are summarised in **Figure 2–source data file 1**, **Figure 6–source data file 1** and **Figure**  
598 **7–source data file 1**.

#### 599 Statistical analysis

600 Abundances of proteins/peptides satisfying at least a ‘medium’ FDR confidence were  
601 subjected to further analysis in Excel 2016 (Microsoft) and R v.3.6.1 (R Core Team, 2019).  
602 For proteomic experiments 1 and 2, abundances in the 3 mock-transduced samples were  
603 used to calculate sample means ( $\bar{x}$ ) and standard deviations (S) for each protein.  
604 Corresponding protein abundances in transduced cells were then compared with these values  
605 to determine standard scores (*t*-scores) for each condition:  $(X-\bar{x})/S$  (where X represents  
606 protein abundance in the condition of interest). Significant outliers were identified by  
607 calculating two-tailed *p*-values using a *t*-distribution with 2 degrees of freedom. Illustrative *t*-  
608 score/*p*-value calculations for PPP2R5A in cells transduced with WT Vif or a control lentivector  
609 are shown in **Figure 2–figure supplement 2**.

610 For proteomic experiment 3, mean protein abundances in cells infected with  $\Delta$ Vpr-Vif WT,  
611  $\Delta$ Vpr- $\Delta$ Vif, or  $\Delta$ Vpr-Vif AYR viruses were compared with mean protein abundances in mock-  
612 infected cells. For each pair-wise comparison, a moderated *t*-test was conducted using the  
613 limma R package (Ritchie et al., 2015; Schwammle et al., 2013). Benjamini-Hochberg FDR-  
614 adjusted *p* values (*q* values) were used to control the false discovery rate.

#### 615 **Antibodies**

616 Antibodies for immunoblot and flow cytometry are detailed in the **Key resources table**. Anti-  
617 HIV-1 Vif (Simon et al., 1995) was obtained from the AIDS Reagent Program, Division of AIDS,  
618 NIAID, NIH (Dr M. H. Malim).

#### 619 **Flow cytometry**

620 Antibody staining

621 For the flow cytometric screen in 293Ts, a sub-confluent 24-well/condition was harvested with  
622 trypsin-EDTA, fixed and permeabilised using the Cytotfix/Cytoperm Fixation and  
623 Permeabilisation Kit (BD Biosciences) according to the manufacturer's instructions.  
624 Permeabilised cells were stained with AF647-conjugated rabbit anti-HA antibody (abcam) for  
625 20 min at RT, washed, and analysed with an LSR Fortessa flow cytometer (BD Biosciences).  
626 Doublets were excluded by comparing SSC-W with SSC-H. Depletion of HA-tagged PPP2R5B  
627 or APOBEC3G was quantified by the ratio of median AF647 fluorescence in GFP+  
628 (transfected, Vif+)/GFP- (untransfected, Vif-) cells for each condition.

629 For titration of HIV-AFMACS viruses, typically  $2 \times 10^5$  washed CEM-T4s were stained with  
630 fluorochrome-conjugated anti-LNGFR and anti-CD4 for 15 min at 4 °C then fixed in PBS/1%  
631 paraformaldehyde and analysed as above. For titration of lentivectors, GFP fluorescence was  
632 quantified without antibody staining.

633 DNA content

634 For cell cycle analysis in transduced CEM-T4s and transduced/transfected HeLas,  $1 \times 10^6$   
635 cells/condition (CEM-T4s) or a 50% confluent 6-well/condition (HeLas) were washed with  
636 PBS, then fixed for 30 min with ice-cold 90% methanol. Fixed cells were stained with 7-AAD  
637 at 25 µg/ml for 30 mins at 37 °C, then analysed with an LSR Fortessa flow cytometer (BD  
638 Biosciences). Doublets were excluded by comparing SSC-W with SSC-H. The FlowJo cell  
639 cycle platform was used to determine the fraction of cells in each phase of cell cycle. G2/M  
640 cell cycle arrest was quantified by the ratio of cells in G2/M for each condition, compared with  
641 mock-transduced/transfected cells.

642 For cell cycle analysis in CEM-T4s infected with HIV-AFMACS, cells were first stained with  
643 FITC-conjugated anti-LNGFR (BioLegend), then washed, fixed and stained with 7-AAD and  
644 analysed as above. G2/M cell cycle arrest was quantified by the ratio of cells in G2/M for  
645 LNGFR+ (infected, HIV+)/LNGFR- (uninfected) cells for each condition.

## 646 **Immunoblotting**

647 Washed cell pellets were lysed in PBS/2% SDS supplemented with Halt Protease and  
648 Phosphatase Inhibitor Cocktail (Thermo Scientific) and benzonase (Sigma) for 10 min at RT.  
649 Post-nuclear supernatants were heated in Laemelli Loading Buffer for 5 min at 95 °C,  
650 separated by SDS-PAGE and transferred to Immobilon-P membrane (Millipore). Membranes  
651 were blocked in PBS/5% non-fat dried milk (Marvel)/0.2% Tween and probed with the  
652 indicated primary antibody overnight at 4 °C. Reactive bands were visualised using HRP-  
653 conjugated secondary antibodies and SuperSignal West Pico or Dura chemiluminescent  
654 substrates (Thermo Scientific). Typically 10–20 µg total protein was loaded per lane.

## 655 **Real-time PCR**

656 Total RNA was extracted using TRIzol reagent (Invitrogen), followed by DNase I treatment.  
657 cDNA was synthesised using the Superscript III First-Strand Synthesis System (Invitrogen)  
658 with Oligo(dT) (Invitrogen). Semi-quantitative PCR was performed on 15 ng of corresponding  
659 cDNA with the primers described below and utilising the SYBR Green PCR Master Mix  
660 (Thermo Scientific). Relative mRNA abundance was quantified using the  $2^{-\Delta\Delta CT}$  method ( $C_T$ ,  
661 threshold cycle), taking the housekeeping gene Tata Binding Protein (TBP) as the internal  
662 control, and control siRNA-transfected cells as the calibrator (Schmittgen and Livak, 2008).  
663 All PCR primers used are tabulated in **Supplementary file 1** (PCR primers for real-time PCR).

## 664 **Visualization of Vif-CUL5 crystal structure**

665 The previously determined structure of Vif in complex with CUL5, CBF $\beta$ , and ELOB/C (PDB  
666 ID: 4N9F) was used to identify solvent-exposed residues to be mutated in this study (Guo et  
667 al., 2014). Structural analysis and figures were generated using PyMOL Molecular Graphics  
668 System, Version 2.0 (Schrödinger).

## 669 **Bioinformatic analysis of Vif polymorphisms**

670 Protein sequence Web Alignments for Vif, Env, Gag and Nef were downloaded from the Los  
671 Alamos HIV Sequence Alignments Database (accessible at: <http://www.hiv.lanl.gov/>). The  
672 following server options were selected: Alignment type, Web (all complete sequences);  
673 Organism, HIV-1/SIVcpz; Subtype, M group without recombinants (A-K); DNA/Protein,  
674 protein; Year, 2018; Format, FASTA.

675 These alignments contain all non-recombinant HIV-1 M group sequences from the Los Alamos  
676 HIV Sequence Database, with the following exceptions: only one sequence per patient is  
677 included; a single representative is included of very similar sequences; and sequences unlikely  
678 to represent naturally-occurring, viable viruses are excluded. We further subdivided the  
679 sequences according to viral clade (subtype) using the information in the sequence name e.g.  
680 B.FR.83.HXB2 is assigned to clade B. Analyses were conducted for both clade B viruses and  
681 all non-recombinant HIV-1 M group viruses.

682 To examine amino acid polymorphism in naturally occurring Vif variants at positions  
683 corresponding to residues 31, 33/34 and 128 of NL4-3 Vif, sequence logos were generated  
684 using WebLogo (Crooks et al., 2004). Further data analysis was conducted in R v.3.6.1 (R  
685 Core Team, 2019). In brief, residues at each position of interest were extracted using the  
686 seqinr R package (Charif and Lobry, 2007), then frequencies were calculated and graphical  
687 summaries generated using the ggplot R package (Wickham, 2009). To identify covariance  
688 (non-random association) between polymorphisms at positions 31 and 128, 2x2 contingency  
689 tables comparing frequencies of key residue pairs were constructed, then subjected to two-  
690 tailed Fisher's exact tests of independence (Wang and Lee, 2007).

691 To construct phylogenetic trees, only viruses with protein sequences available for all of Vif,  
692 Env, Gag and Nef were included. This enabled direct comparison of trees based on different  
693 viral proteins. Multiple sequence alignments and phylogenetic tree data (in Newick format) for  
694 each viral protein were generated using the Clustal Omega web server (Sievers and Higgins,  
695 2014), then visualised using the ggtree R package (Yu et al., 2018).

696 All alignment and sequence files, scripts and details of the bioinformatic analyses described  
697 here are available at: [https://github.com/annaprotasio/Marelli\\_et\\_al\\_HIV\\_Vif](https://github.com/annaprotasio/Marelli_et_al_HIV_Vif).

### 698 **General statistical analysis**

699 Where indicated, Student's *t*-tests (unpaired two-sample, assuming homoscedasticity, two-  
700 tailed), Fisher's exact tests (two-tailed) and 95% confidence intervals were calculated using  
701 Prism 7.0 (GraphPad). General data manipulation was conducted using Excel 2016  
702 (Microsoft).



## 703 **Acknowledgements**

704 This work was supported by the MRC (CSF MR/P008801/1 to NJM), NHSBT (WPA15-02 to  
705 NJM), the Wellcome Trust (PRF 210688/Z/18/Z to PJJ), the NIHR Cambridge BRC, and a  
706 Wellcome Trust Strategic Award to CIMR. The authors thank Dr Reiner Schulte and the CIMR  
707 Flow Cytometry Core Facility team, and members of the Matheson and Lehner laboratories  
708 for critical discussion.

709

## 710 **Competing interests**

711 The authors declare no competing interests.

## 712 **Figures**

### 713 **Figure 1. Flow cytometric screen of HIV-1 Vif point mutants**

714 (A) Depletion of endogenous PPP2R5D by HIV-1 Vif. CEM-T4s were transduced with  
715 transduced with lentiviruses encoding either EGFP-SBP- $\Delta$ LNGFR (Ctrl) or EGFP-P2A-Vif (Vif)  
716 at an MOI of 3, then lysed in 2% SDS and analysed by immunoblot with anti-Vif, anti-PPP2R5D  
717 and anti- $\beta$ -actin (loading control) antibodies after 48 hr. Green arrows, Ctrl vs Vif.

718 (B) Solvent-accessible surfaces of Vif (pale blue) in complex with CUL5 (dark grey), ELOB/C  
719 (grey) and CBF- $\beta$  (light grey). Residues highlighted in yellow were targeted in our library of  
720 point mutants (total 34). Residues highlighted in red specifically affected the depletion of  
721 PPP2R5B, but not APOBEC3G.

722 (C-D) Depletion of PPP2R5B (C) or APOBEC3G (D) by selected Vif point mutants. 293Ts  
723 stably expressing HA-tagged PPP2R5B or APOBEC3G were transfected with constructs  
724 encoding EGFP-P2A-Vif, then fixed/permeabilised, stained with AF647-conjugated anti-HA  
725 antibody and analysed by flow cytometry after 36 hr (see **Figure 1–figure supplement 1B-**  
726 **C**). For each Vif point mutant, abundance of PPP2R5B or APOBEC3G is shown as a ratio of  
727 AF647 fluorescence in GFP+ (transfected, Vif+) to GFP- (untransfected, Vif-) cells. Individual  
728 data points represent biological replicates (minimum 3). Mean values with standard error of  
729 the mean (SEM) are indicated. Vif point mutants specifically affecting the depletion of  
730 PPP2R5B are highlighted in red. Ctrl, control constructs encoding EGFP or EGFP-SBP-  
731  $\Delta$ LNGFR. Data for other Vif point mutants are shown in **Figure 1–figure supplement 2A-B**.  
732 Green arrows, Ctrl vs Vif WT.

733 (E) Representative data from (C-D). Green, GFP+, transfected cells (Vif+); grey, GFP-,  
734 untransfected cells (Vif-); dotted line, background staining of control 293Ts (no HA-tagged  
735 protein expression).

736

737 **Figure 2. Depletion of endogenous APOBEC3 and PPP2R5 family proteins by HIV-1 Vif**  
738 **point mutants**

739 (A) Depletion of endogenous PPP2R5D by selected Vif point mutants. CEM-T4s were  
740 transduced with lentiviruses encoding EGFP-P2A-Vif at an MOI of 3, then lysed in 2% SDS  
741 and analysed by immunoblot with anti-Vif, anti-PPP2R5D and anti- $\beta$ -actin (loading control)  
742 antibodies after 48 hr. Ctrl, control construct encoding EGFP-SBP- $\Delta$ LNGFR.

743 (B) Overview of proteomic experiment 1 (selected Vif point mutants). CEM-T4s were  
744 transduced with lentiviruses encoding EGFP-P2A-Vif at an MOI of 3, then analysed by TMT-  
745 based quantitative proteomics after 48 hr. Mock\_1/2/3, biological replicates. Ctrl, control  
746 construct encoding EGFP-SBP- $\Delta$ LNGFR.

747 (C-D) Depletion of endogenous PPP2R5 family (C) or APOBEC3 family (D) proteins by  
748 selected Vif point mutants in cells from (B). For each Vif point mutant, abundance of respective  
749 PPP2R5 or APOBEC family members is shown as a ratio to the mean abundance of the same  
750 family member in the 3 mock-transduced samples. Significant outliers from the distribution of  
751 abundances in mock-transduced samples are highlighted (see **Materials and methods** and  
752 **Figure 2–figure supplement 2** for further details). \* $p < 0.05$ .

753

754 **Figure 3. Regulation of cell cycle by HIV-1 Vif point mutants**

755 (A) Phosphorylation of aurora kinases in the presence of selected Vif point mutants. CEM-T4s  
756 were transduced with lentiviruses encoding EGFP-P2A-Vif at an MOI of 3, then lysed in 2%  
757 SDS and analysed by immunoblot with anti-Vif, anti-phospho-AURK, anti-total AURKB and  
758 anti-p97 (loading control) antibodies after 48 hr. Ctrl, control construct encoding EGFP-SBP-  
759  $\Delta$ LNGFR.

760 (B) Regulation of cyclin B1 by selected Vif point mutants in cells from proteomic experiment 1  
761 (**Figure 2B**). For each Vif point mutant, abundance of cyclin B1 is shown as a ratio to the

762 mean abundance in the 3 mock-transduced samples. Significant outliers from the distribution  
763 of abundances in mock-transduced samples are highlighted (see **Materials and methods** for  
764 details). \* $p < 0.05$ ; \*\* $p < 0.05$ .

765 (C-D) Regulation of cell cycle by selected Vif point mutants. CEM-T4s were transduced with  
766 lentiviruses encoding EGFP-P2A-Vif at an MOI of 3, then fixed in 90% methanol, stained with  
767 7-AAD and analysed by flow cytometry after 48 hr. Representative data (C) from 3 biological  
768 replicates (D) are shown. For each Vif point mutant, the fraction of cells in G2/M is shown as  
769 a ratio to the fraction of cells in G2/M in mock-transduced cells. Individual data points reflect  
770 biological replicates. Mean values with SEM are indicated. Significant differences compared  
771 with mock-transduced cells are highlighted ( $t$ -tests). \* $p < 0.05$ . Ctrl, control construct encoding  
772 EGFP-SBP- $\Delta$ LNGFR.

773

#### 774 **Figure 4. Regulation of cell cycle by depletion of PPP2R5 family subunits**

775 (A-B) Regulation of cell cycle by individual vs pooled PPP2R5A-E siRNA. HeLas were  
776 transfected with the indicated siRNA, then fixed in 90% MeOH methanol, stained with 7-AAD  
777 and analysed by flow cytometry after 48 hr. Representative data (A) from 3 biological  
778 replicates (B) for each of 2 panels of siRNA are shown. For each condition, the fraction of cells  
779 in G2/M is shown as a ratio to the fraction of cells in G2/M in mock-transfected cells. Individual  
780 data points reflect biological replicates. Mean values with SEM are indicated. Significant  
781 differences compared with mock-transduced cells are highlighted ( $t$ -tests). \* $p < 0.05$ .  
782 \*\*\* $p < 0.0005$ . Ctrl siRNA, MISSION siRNA Universal Negative Control #1. Blue  
783 histograms/data points, siRNA panel 1. Red histograms/data points, siRNA panel 2.

784 (C-D) Regulation of cell cycle by combinations of pooled PPP2R5A-E siRNA. HeLas were  
785 transfected with the indicated siRNA, then fixed in 90% MeOH methanol, stained with 7-AAD  
786 and analysed by flow cytometry after 48 hr. Representative data (C) from 3 biological  
787 replicates (D) for each of 2 panels of siRNA are shown. All details as per (A-B).

788

789 **Figure 5. Analysis of naturally occurring HIV-1 Vif variants**

790 (A) Amino acid polymorphism amongst 2,171 naturally occurring HIV-1 M group Vif variants  
791 (clade B). Sequence logos (left panel) and bar chart (right panel) highlight frequencies of  
792 amino acids corresponding to residues 31, 33 and 128 of NL4-3 Vif. In the sequence logos,  
793 polar amino acids (AAs) are depicted in green; neutral AAs, in purple; basic AAs, in blue;  
794 acidic AAs, in red; and hydrophobic AAs, in black. An equivalent bar chart for all naturally  
795 occurring non-recombinant HIV-1 M group Vif variants (all clades) is shown in **Figure 5–figure**  
796 **supplement 1**.

797 (B) Depletion of PPP2R5B by selected Vif point mutants. 293Ts stably expressing HA-tagged  
798 PPP2R5B were transfected with constructs encoding EGFP-P2A-Vif, then  
799 fixed/permeabilised, stained with AF647-conjugated anti-HA antibody and analysed by flow  
800 cytometry after 36 hr. Ctrl, control construct encoding EGFP-SBP- $\Delta$ LNGFR. All details as per  
801 **Figure 1B**.

802 (C) Sequence alignments of selected Vif variants. Amino acids corresponding to residues 31,  
803 33 and 128 of NL4-3 Vif are highlighted in red (red boxes). Other residues targeted in our  
804 library of point mutants and known to interact with APOBEC3G (green), APOBEC3C/F  
805 (orange) and APOBEC3H (blue) are also shown (as per **Figure 1–figure supplement 2**).  
806 Additional annotations ( $\alpha$ -helices,  $\beta$ -sheets, Zn finger and BC-box) are based on the published  
807 Vif-CUL5 crystal structure (Guo et al., 2014).

808 (D) Depletion of PPP2R5B by selected Vif variants. 293Ts stably expressing HA-tagged  
809 PPP2R5B were transfected with constructs encoding EGFP-P2A-Vif, then  
810 fixed/permeabilised, stained with AF647-conjugated anti-HA antibody and analysed by flow  
811 cytometry after 36 hr. Ctrl, control construct encoding EGFP-SBP- $\Delta$ LNGFR. All details as per  
812 **(B)** and **Figure 1B**.

813

814 **Figure 6. Depletion of endogenous APOBEC3 and PPP2R5 family proteins by naturally**  
815 **occurring HIV-1 Vif variants**

816 (A) Overview of proteomic experiment 2 (naturally occurring Vif variants and corresponding  
817 point mutants). CEM-T4s were transduced with lentiviruses encoding EGFP-P2A-Vif at an  
818 MOI of 3, then analysed by TMT-based quantitative proteomics after 48 hr. Mock\_1/2/3,  
819 biological replicates. Ctrl, control construct encoding EGFP. NL4-3 AYR, NL4-3 Vif with both  
820 I31A and RI127/128YR mutations.

821 (B-C) Depletion of endogenous PPP2R5 family (B) or APOBEC3 family (C) proteins by  
822 naturally occurring Vif variants and corresponding point mutants in cells from (A). For each Vif  
823 variant or point mutant, abundance of respective PPP2R5 or APOBEC family members is  
824 shown as a ratio to the mean abundance of the same family member in the 3 mock-transduced  
825 samples. Significant outliers from the distribution of abundances in mock-transduced samples  
826 are highlighted (see **Materials and methods** and **Figure 2–figure supplement 2** for further  
827 details). \* $p < 0.05$ ; \*\* $p < 0.005$ . † Not detected in this experiment (PPP2R5B, APOBEC3F).

828 (D) Regulation of cell cycle by naturally occurring Vif variants and corresponding point  
829 mutants. CEM-T4s were transduced with lentiviruses encoding EGFP-P2A-Vif at an MOI of 3,  
830 then fixed in 90% methanol, stained with 7-AAD and analysed by flow cytometry after 48 hr.  
831 Individual data points reflect 3 biological replicates (representative data, **Figure 6–figure**  
832 **supplement 3**). \*\* $p < 0.005$ . \*\*\* $p < 0.0005$ . Ctrl, control construct encoding EGFP. NL4-3 AYR,  
833 NL4-3 Vif with both I31A and RI127/128YR mutations. All other details as per **Figure 3C-D**.

834

835 **Figure 7. Selective regulation of PPP2R5 family subunits during HIV-1 infection**

836 (A) Overview of proteomic experiment 3 (viral infections). CEM-T4s were infected with HIV-  
837 AFMACS viruses at an MOI of 0.5, then purified using AFMACS (**Figure 7–figure**  
838 **supplement 1A-B**) and analysed by TMT-based quantitative proteomics after 48 hr. Biological  
839 replicates are shown. Vif AYR, NL4-3 Vif with both I31A and RI127/128YR mutations.

840 (B) Protein abundances in HIV-infected vs mock-infected cells from (A). Volcano plots show  
841 statistical significance (y-axis) vs fold change (x-axis) for 6,294 viral and cellular proteins (no  
842 missing values). Pair-wise comparisons of mock-infected cells with cells infected with  $\Delta$ Vpr-  
843 Vif WT (left panel),  $\Delta$ Vpr- $\Delta$ Vif (middle panel) or  $\Delta$ Vpr-Vif AYR (right panel) viruses are shown.  
844 Proteins with Benjamini-Hochberg FDR-adjusted p values (q values) <0.05 (black crosses) or  
845 >0.05 (grey crosses) are indicated (FDR threshold of 5%). Proteins highlighted in each plot  
846 are summarised in the key. 4 out of 5 PPP2R5 family subunits (A/C/D/E) were quantitated,  
847 but only 1 out of 7 APOBEC3 family member (C).

848 (C) Regulation of cell cycle in HIV-infected cells. CEM-T4s were infected with HIV-AFMACS  
849 viruses at an MOI of 0.5, then stained with FITC-conjugated anti-LNGFR antibody, fixed in  
850 90% methanol, stained with 7-AAD and analysed by flow cytometry after 48 hr. Representative  
851 data (upper panels) from 3 biological replicates (lower panel) are shown. Green, LNGFR+  
852 cells (HIV+); grey, LNGFR- cells (uninfected). For each virus, the fraction of HIV+ (LNGFR+)  
853 cells in G2/M is shown as a ratio to the fraction of cells in G2/M in uninfected (LNGFR-) cells.  
854 Individual data points reflect biological replicates. Mean values with SEM are indicated.  
855 Significant differences are highlighted for each pair-wise comparison (*t*-tests). \*\**p*<0.005.

856 (D) Pair-wise combinations of key amino acid polymorphisms amongst 2,171 naturally  
857 occurring HIV-1 M group Vif variants (clade B). Frequencies of amino acids corresponding to  
858 residues 31 and 128 of NL4-3 Vif are shown. An equivalent pie chart for all naturally occurring  
859 non-recombinant HIV-1 M group Vif variants (all clades) is shown in **Figure 7–figure**  
860 **supplement 2B**.

861 (E) Phylogenetic tree of 795 HIV-1 M group viruses (clade B) with protein sequences available  
862 for all of Vif, Gag, Env and Nef (based on relatedness of Vif). Viruses encoding Vif variants  
863 with I31/I128 (most active, red) and V31/R128 (least active, blue) are highlighted. Equivalent  
864 phylogenetic trees based on relatedness of Gag, Env or Nef are shown in **Figure 7–figure**  
865 **supplement 3A**.

## 866 **Figure supplements**

### 867 **Figure 1–figure supplement 1. Further details for site-directed mutagenesis and flow** 868 **cytometric screen**

869 (A) Overview of PCR and Gibson assembly-based approach to site-directed mutagenesis.  
870 PCR products are digested with DpnI (1 hr, 37 °C) to degrade template. Vector is digested  
871 with XhoI and KpnI, gel purified, then assembled with PCR products using the NEBuilder HiFi  
872 DNA Assembly Master Mix (1 hr, 50 °C) and transformed into competent cells. Mut\_Fwd and  
873 Mut\_Rvs, mutation-specific primers; Vif\_Fwd and Vif\_Rvs, common primers; seq, sequencing  
874 primer; red circle, site of intended mutation; red cross, intended mutation; red parallel lines,  
875 cut sites; orange boxes, overlapping sequences.

876 (B) Overview of flow cytometric screen. 293Ts stably expressing HA-tagged PPP2R5B or  
877 APOBEC3G were transfected with constructs encoding EGFP-P2A-Vif, then  
878 fixed/permeabilised, stained with AF647-conjugated anti-HA antibody and analysed by flow  
879 cytometry after 36 hr.

880 (C) Illustrative data and gating strategy for flow cytometric screen. A4647 fluorescence  
881 indicates abundance of PPP2R5B. For each Vif point mutant, A4647 fluorescence is  
882 compared between Green, GFP+, transfected cells (Vif+); grey, GFP-, untransfected cells  
883 (Vif-); dotted line, background staining of control 293Ts (no HA-tagged protein expression).  
884 Upper panels, control construct encoding EGFP; lower panels, construct encoding EGFP-  
885 P2A-Vif (WT).

886

### 887 **Figure 1–figure supplement 2. Complete results of flow cytometric screen**

888 (A-B) Depletion of PPP2R5B (A) or APOBEC3G (B) by all Vif point mutants targeted in our  
889 library. 293Ts stably expressing HA-tagged PPP2R5B or APOBEC3G were transfected with  
890 constructs encoding EGFP-P2A-Vif, then fixed/permeabilised, stained with AF647-conjugated  
891 anti-HA antibody and analysed by flow cytometry after 36 hr (see **Figure 1–figure**



892 **supplement 1B-C).** For each Vif point mutant, abundance of PPP2R5B or APOBEC3G is  
893 shown as a ratio of A4647 fluorescence in GFP+ (transfected, Vif+) to GFP- (untransfected,  
894 Vif-) cells. Individual data points represent biological replicates (minimum 2). Mean values with  
895 SEM are indicated. Vif point mutants specifically affecting the depletion of PPP2R5B are  
896 highlighted in red (also shown in **Figure 1B-D**). Other residues included in our screen and  
897 known to interact with APOBEC3G (green), APOBEC3C/F (orange) and APOBEC3H (blue)  
898 are also indicated (Gaddis et al., 2003; Letko et al., 2015; Nakashima et al., 2016; Ooms et  
899 al., 2016). Ctrl, control construct encoding EGFP or EGFP-SBP- $\Delta$ LNGFR.

900 (C) Solvent-accessible surfaces of Vif (pale blue) in complex with CUL5 (dark grey), ELOB/C  
901 (grey) and CBF- $\beta$  (light grey). Residues specifically affecting the depletion of PPP2R5B are  
902 highlighted in red, together with residues included in our screen and known to interact with  
903 APOBEC3G (green), APOBEC3C/F (orange) and APOBEC3H (blue), as per (A-B).

904

#### 905 **Figure 2–figure supplement 1. Stability of selected Vif point mutants**

906 Expression of selected Vif point mutants in cells from proteomic experiment 1 (**Figure 2B**).  
907 For each Vif point mutant, abundance is shown as a ratio to Vif WT.

908

#### 909 **Figure 2–figure supplement 2. Calculation of *t*-scores and *p*-values**

910 Illustrative *t*-score/*p*-value calculations for PPP2R5A in cells transduced with EGFP-SBP-  
911  $\Delta$ LNGFR (control lentivector) or WT Vif. Graphs show protein abundance (x axis) vs probability  
912 density (y axis). A *t*-distribution (2 degrees of freedom) based on PPP2R5A abundances in  
913 mock-transduced cells (3 biological replicates) is shown (grey bell curve). Abundances from  
914 mock-transduced cells (grey data points, all panels), cells transduced with EGFP-SBP-  
915  $\Delta$ LNGFR (Ctrl, blue data point, middle panel) or Vif WT (red data point, right panel) are  
916 projected on to the distribution for illustrative purposes. Standard scores (*t*-scores) indicate

917 distance (number of standard deviations,  $S$ ) from the sample mean ( $\bar{x}$ ). Corresponding two-  
918 tailed  $p$ -values are shown. Note that for a  $t$ -distribution with 2 degrees of freedom, the 95%  
919 confidence interval lies within +/- 4.30 standard deviations of the mean, compared with +/-  
920 1.96 standard deviations of the mean for the normal distribution (z-distribution).

921

922 **Figure 3—figure supplement 1. Additional controls for cell cycle analysis (Vif point**  
923 **mutants)**

924 (A-B) Regulation of cell cycle by selected Vif point mutants. CEM-T4s were transduced with  
925 lentiviruses encoding EGFP-P2A-Vif at an MOI of 3, then fixed in 90% methanol, stained with  
926 7-AAD and analysed by flow cytometry after 48 hr. Representative data (A) from 2 biological  
927 replicates (B) are shown. Mean values are indicated. Ctrl, control construct encoding EGFP-  
928 SBP- $\Delta$ LNGFR. All other details as per **Figure 3C-D**.

929

930 **Figure 3—figure supplement 2. Depletion of endogenous DPH7 and FMR1 by selected**  
931 **Vif point mutants**

932 (A) Depletion of DPH7 (left panel) and FMR1 (right panel) by selected Vif point mutants in  
933 cells from proteomic experiment 1 (**Figure 2B**). For each Vif point mutant, abundances of  
934 DPH7 and FMR1 are shown as a ratio to the mean abundances in the 3 mock-transduced  
935 samples. Significant outliers from the distribution of abundances in mock-transduced samples  
936 are highlighted (see **Materials and methods** for details). \* $p < 0.05$ .

937

938 **Figure 4—figure supplement 1. Additional controls for cell cycle analysis (PPP2R5A-E**  
939 **siRNA)**

940 (A) Regulation of cell cycle by PP2A inhibition. CEM-T4s were treated with either 100nM  
941 Okadaic acid or DMSO (vehicle) for 16 hr, then fixed in 90% methanol, stained with 7-AAD  
942 and analysed by flow cytometry.

943 (B) Regulation of cell cycle in HeLas by Vif. Cells were transduced with GFP-P2A-Vif at an  
944 MOI of 3, then fixed in 90% methanol, stained with 7-AAD and analysed by flow cytometry  
945 after 48 hr. Ctrl, control construct encoding EGFP.

946 (C) Efficiency of PPP2R5A-E knockdown. HeLas were transfected with pooled PPP2R5A-E  
947 siRNAs (as per **Figure 4**), then analysed by real-time PCR after 24 hr. For each PPP2R5  
948 family subunit, relative mRNA abundance is shown as a ratio to the abundance in control  
949 siRNA-transfected cells (Ctrl), normalized to Tata Binding Protein (TBP) expression. Individual  
950 data points represent 2 biological replicates for each of 2 panels of siRNA. Mean values are  
951 indicated.

952

953 **Figure 4–figure supplement 2. Additional controls for cell cycle analysis (DPH7 and**  
954 **FMR1 siRNA)**

955 (A-B) Regulation of cell cycle by DPH7 and FMR1 siRNA. HeLas were transfected with the  
956 indicated siRNA, then fixed in 90% MeOH methanol, stained with 7-AAD and analysed by flow  
957 cytometry after 48 hr. Representative data (A) from 3 biological replicates (B) for each of 2  
958 siRNAs are shown. For each condition, the fraction of cells in G2/M is shown as a ratio to the  
959 fraction of cells in G2/M in mock-transfected cells. Individual data points reflect biological  
960 replicates. Mean values with 95% confidence intervals (CIs) are indicated. Ctrl siRNA,  
961 MISSION siRNA Universal Negative Control #1.

962 (C) Efficiency of DPH7 and FMR1 knockdown. Cells from (A-B) were lysed in 2% SDS 24 hr  
963 after siRNA transfection and analysed by immunoblot with anti-FMR, anti-DPH7 and anti- $\beta$ -  
964 actin (loading control) antibodies.

965

966 **Figure 5–figure supplement 1.**

967 Amino acid polymorphism amongst 3,412 naturally occurring non-recombinant HIV-1 M group  
968 Vif variants (all clades). Bar chart highlights frequencies of amino acids corresponding to  
969 residues 31, 33 and 128 of NL4-3 Vif.

970

971 **Figure 5–figure supplement 2. Depletion of APOBEC3G by selected Vif variants**

972 Depletion of APOBEC3G by selected Vif variants. 293Ts stably expressing HA-tagged  
973 APOBEC3G were transfected with constructs encoding EGFP-P2A-Vif, then  
974 fixed/permeabilised, stained with AF647-conjugated anti-HA antibody and analysed by flow  
975 cytometry after 36 hr. Ctrl, control construct encoding EGFP-SBP- $\Delta$ LNGFR. All details as per  
976 **Figure 1B.**

977

978 **Figure 6–figure supplement 1. Sequence of Exonic Splicing Silencer of Vpr (ESSV) in**  
979 **NL4-3 and YU2 Vif variants**

980 The ESSV (highlighted in bold) is a short nucleotide element within the HIV-1 Vif open reading  
981 frame (exon 3) required to repress splicing at HIV-1 3' splice site A2 and allow accumulation  
982 of unspliced mRNA, production of Gag and HIV viral replication (Madsen and Stoltzfus, 2005).  
983 Inhibitory activity is dependent on three (Py/A)UAG motifs (indicated with black lines).  
984 Introduction of an isolated I128R mutation into NL4-3 Vif would disrupt the second (Py/A)UAG  
985 motif. Conversely, simultaneous introduction of an R127Y mutation (as in YU2 Vif) maintains  
986 three (Py/A)UAG motifs. Note that the nucleotide (nucl) and amino acid (aa) sequences  
987 flanking these positions is otherwise conserved between NL4-3 and YU2 viruses.

988

989 **Figure 6–figure supplement 2. Depletion of PPP2R5B and APOBEC3G by Vif AYR**

990 (A-B) 293Ts stably expressing HA-tagged PPP2R5B or APOBEC3G were transfected with  
991 constructs encoding EGFP-P2A-Vif, then fixed/permeabilised, stained with AF647-conjugated  
992 anti-HA antibody and analysed by flow cytometry after 36 hr. Representative data (A) from 3  
993 biological replicates (B) are shown. Ctrl, control construct encoding EGFP. All details as per  
994 **Figure 1B**.

995

996 **Figure 6–figure supplement 3. Regulation of cell cycle by naturally occurring Vif**  
997 **variants and corresponding point mutants (representative data)**

998 CEM-T4s were transduced with lentiviruses encoding EGFP-P2A-Vif at an MOI of 3, then fixed  
999 in 90% methanol, stained with 7-AAD and analysed by flow cytometry after 48 hr.  
1000 Representative data from **Figure 6D**.

1001

1002 **Figure 7–figure supplement 1. AFMACS-based purification of infected cells for**  
1003 **proteomic experiment 3 (viral infections)**

1004 HIV-infected cells from **Figure 7A** were stained with anti-LNGFR and anti-CD4 antibodies and  
1005 analysed by flow cytometry before (input) and after (purified vs flow-through) selection using  
1006 AFMACS. Purified cells were used for proteomic analysis. Infected cells express the SBP-  
1007  $\Delta$ LNGFR cell surface affinity tag (LNGFR+) and downregulate CD4 through the action of Nef  
1008 and Vpu (Guy et al., 1987; Naamati et al., 2019; Willey et al., 1992). Representative data (A)  
1009 from 3 biological replicates (B) are shown. Vif AYR, NL4-3 Vif with both I31A and R1127/128YR  
1010 mutations.

1011

1012 **Figure 7–figure supplement 2. Additional bioinformatics analysis**

1013 (A) Contingency tables showing combinations of key amino acid polymorphisms amongst  
1014 naturally occurring HIV-1 M group Vif variants (clade B) summarised in **Figure 7D**.

1015 (B) Pair-wise combinations of key amino acid polymorphisms amongst 3,412 naturally  
1016 occurring non-recombinant HIV-1 M group Vif variants (all clades). Frequencies of amino  
1017 acids corresponding to residues 31 and 128 of NL4-3 Vif are shown. Same sequences as  
1018 **Figure 5–figure supplement 1.**

1019 (C) Contingency tables showing combinations of key amino acid polymorphisms amongst  
1020 naturally occurring non-recombinant HIV-1 M group Vif variants (all clades) summarised in  
1021 (B).

1022

1023 **Figure 7–figure supplement 2. Additional phylogenetic trees**

1024 (A) Phylogenetic trees of 795 HIV-1 M group viruses (clade B) with protein sequences  
1025 available for all of Vif, Gag, Env and Nef (based on relatedness of Gag, Env or Nef). Viruses  
1026 encoding Vif variants with I31/I128 (most active, red) and V31/R128 (least active, blue) are  
1027 highlighted.

1028 (B) Phylogenetic trees of 1,649 naturally occurring non-recombinant HIV-1 M group viruses  
1029 (all clades) with protein sequences available for all of Vif, Gag, Env and Nef (based on  
1030 relatedness of Vif). In the left panel, viruses encoding Vif variants with I31/I128 (most active,  
1031 red) and V31/R128 (least active, blue) are highlighted. In the right panel (same phylogenetic  
1032 tree), viruses are coloured according to clade (as indicated).

1033 **Source data**

1034 **Figure 2–source data 1. Complete data from proteomic experiment 1 (selected Vif point**  
1035 **mutants)**

1036 Complete dataset (unfiltered) from TMT-based quantitative proteomic experiment illustrated  
1037 in **Figure 2B**. For each protein, normalised, unscaled protein abundances, the number of  
1038 unique peptides used for protein quantitation, and the protein FDR confidence are shown.

1039

1040 **Figure 6–source data 1. Complete data from proteomic experiment 2 (naturally**  
1041 **occurring Vif variants and corresponding point mutants)**

1042 Complete dataset (unfiltered) from TMT-based quantitative proteomic experiment illustrated  
1043 in **Figure 6A**. For each protein, normalised, unscaled protein abundances, the number of  
1044 unique peptides used for protein quantitation, and the protein FDR confidence are shown.

1045

1046 **Figure 7–source data 1. Complete data from proteomic experiment 3 (viral infections)**

1047 Complete dataset (unfiltered) from TMT-based quantitative proteomic experiment illustrated  
1048 in **Figure 7A**. For each protein, normalised, unscaled protein abundances, the number of  
1049 unique peptides used for protein quantitation, and the protein FDR confidence are shown.

1050 **Supplementary files**

1051 **Supplementary file 1. DNA and RNA sequences**

1052 Sequences of PCR primers for Vif mutant library construction, codon-optimised Vif variants  
1053 synthesised as gBlocks, Vif YRA in pNL4-3-dEnv-Nef-P2A-SBP- $\Delta$ LNGFR, oligonucleotides  
1054 for RNAi and primers for real-time PCR.



## 1055 **References**

- 1056 Ajay, A.K., Upadhyay, A.K., Singh, S., Vijayakumar, M.V., Kumari, R., Pandey, V., Boppana,  
1057 R., and Bhat, M.K. (2010). Cdk5 phosphorylates non-genotoxically overexpressed p53  
1058 following inhibition of PP2A to induce cell cycle arrest/apoptosis and inhibits tumor  
1059 progression. *Mol Cancer* 9, 204.
- 1060 Bagga, S., and Bouchard, M.J. (2014). Cell cycle regulation during viral infection. *Methods*  
1061 *Mol Biol* 1170, 165-227.
- 1062 Berger, G., Durand, S., Fargier, G., Nguyen, X.N., Cordeil, S., Bouaziz, S., Muriaux, D.,  
1063 Darlix, J.L., and Cimarelli, A. (2011). APOBEC3A is a specific inhibitor of the early phases of  
1064 HIV-1 infection in myeloid cells. *PLoS Pathog* 7, e1002221.
- 1065 Binka, M., Ooms, M., Steward, M., and Simon, V. (2012a). The Activity Spectrum of Vif from  
1066 Multiple HIV-1 Subtypes against APOBEC3G, APOBEC3F, and APOBEC3H. 86, 49-59.
- 1067 Binka, M., Ooms, M., Steward, M., and Simon, V. (2012b). The activity spectrum of Vif from  
1068 multiple HIV-1 subtypes against APOBEC3G, APOBEC3F, and APOBEC3H. *J Virol* 86, 49-  
1069 59.
- 1070 Charif, D., and Lobry, J.R. (2007). Seqin{R} 1.0-2: a contributed package to the {R} project  
1071 for statistical computing devoted to biological sequences retrieval and analysis. In *Structural*  
1072 *approaches to sequence evolution: Molecules, networks, populations*, U. Bastolla, M. Porto,  
1073 R.H. E., and M. Vendruscolo, eds. (New York: Springer Verlag), pp. 207-232.
- 1074 Chen, G., He, Z., Wang, T., Xu, R., and Yu, X.F. (2009). A Patch of Positively Charged  
1075 Amino Acids Surrounding the Human Immunodeficiency Virus Type 1 Vif SLVx4Yx9Y Motif  
1076 Influences Its Interaction with APOBEC3G. *J Virol* 83, 8674-8682.
- 1077 Compton, A.A., Malik, H.S., and Emerman, M. (2013). Host gene evolution traces the  
1078 evolutionary history of ancient primate lentiviruses. *Philos Trans R Soc Lond B Biol Sci* 368,  
1079 20120496.

1080 Conticello, S.G., Harris, R.S., and Neuberger, M.S. (2003). The Vif protein of HIV triggers  
1081 degradation of the human antiretroviral DNA deaminase APOBEC3G. *Curr Biol* 13, 2009-  
1082 2013.

1083 Crooks, G.E., Hon, G., Chandonia, J.M., and Brenner, S.E. (2004). WebLogo: a sequence  
1084 logo generator. *Genome Res* 14, 1188-1190.

1085 Dang, Y., Wang, X., Zhou, T., York, I.A., and Zheng, Y.H. (2009). Identification of a Novel  
1086 WxSLVK Motif in the N Terminus of Human Immunodeficiency Virus and Simian  
1087 Immunodeficiency Virus Vif That Is Critical for APOBEC3G and APOBEC3F Neutralization. *J*  
1088 *Virology* 83, 8544-8552.

1089 DeHart, J.L., Bosque, A., Harris, R.S., and Planelles, V. (2008). Human immunodeficiency  
1090 virus type 1 Vif induces cell cycle delay via recruitment of the same E3 ubiquitin ligase  
1091 complex that targets APOBEC3 proteins for degradation. *J Virol* 82, 9265-9272.

1092 Doehle, B.P., Schafer, A., and Cullen, B.R. (2005). Human APOBEC3B is a potent inhibitor  
1093 of HIV-1 infectivity and is resistant to HIV-1 Vif. *Virology* 339, 281-288.

1094 Evans, E.L., 3rd, Becker, J.T., Fricke, S.L., Patel, K., and Sherer, N.M. (2018). HIV-1 Vif's  
1095 Capacity To Manipulate the Cell Cycle Is Species Specific. *J Virol* 92.

1096 Fenton-May, A.E., Dibben, O., Emmerich, T., Ding, H., Pfafferott, K., Aasa-Chapman, M.M.,  
1097 Pellegrino, P., Williams, I., Cohen, M.S., Gao, F., *et al.* (2013). Relative resistance of HIV-1  
1098 founder viruses to control by interferon-alpha. *Retrovirology* 10, 146.

1099 Foley, E.A., Maldonado, M., and Kapoor, T.M. (2011). Formation of stable attachments  
1100 between kinetochores and microtubules depends on the B56-PP2A phosphatase. *Nature*  
1101 *cell biology* 13, 1265-1271.

1102 Foley, G.E., Handler, A.H., Lynch, P.M., Wolman, S.R., Stulberg, C.S., and Eagle, H. (1965).  
1103 Loss of neoplastic properties in vitro. II. Observations on KB sublines. *Cancer Res* 25, 1254-  
1104 1261.

1105 Gabuzda, D.H., Lawrence, K., Langhoff, E., Terwilliger, E., Dorfman, T., Haseltine, W.A.,  
1106 and Sodroski, J. (1992). Role of vif in replication of human immunodeficiency virus type 1 in  
1107 CD4+ T lymphocytes. *J Virol* 66, 6489-6495.

- 1108 Gaddis, N.C., Chertova, E., Sheehy, A.M., Henderson, L.E., and Malim, M.H. (2003).  
1109 Comprehensive investigation of the molecular defect in vif-deficient human  
1110 immunodeficiency virus type 1 virions. *J Virol* 77, 5810-5820.
- 1111 Geiger, T., Wehner, A., Schaab, C., Cox, J., and Mann, M. (2012). Comparative proteomic  
1112 analysis of eleven common cell lines reveals ubiquitous but varying expression of most  
1113 proteins. *Mol Cell Proteomics* 11, M111 014050.
- 1114 Goh, W.C., Rogel, M.E., Kinsey, C.M., Michael, S.F., Fultz, P.N., Nowak, M.A., Hahn, B.H.,  
1115 and Emerman, M. (1998). HIV-1 Vpr increases viral expression by manipulation of the cell  
1116 cycle: a mechanism for selection of Vpr in vivo. *Nat Med* 4, 65-71.
- 1117 Grallert, A., Boke, E., Hagting, A., Hodgson, B., Connolly, Y., Griffiths, J.R., Smith, D.L.,  
1118 Pines, J., and Hagan, I.M. (2015). A PP1-PP2A phosphatase relay controls mitotic  
1119 progression. *Nature* 517, 94-98.
- 1120 Greenwood, E.J., Matheson, N.J., Wals, K., van den Boomen, D.J., Antrobus, R.,  
1121 Williamson, J.C., and Lehner, P.J. (2016). Temporal proteomic analysis of HIV infection  
1122 reveals remodelling of the host phosphoproteome by lentiviral Vif variants. *Elife* 5.
- 1123 Greenwood, E.J.D., Williamson, J.C., Sienkiewicz, A., Naamati, A., Matheson, N.J., and  
1124 Lehner, P.J. (2019). Promiscuous Targeting of Cellular Proteins by Vpr Drives Systems-  
1125 Level Proteomic Remodeling in HIV-1 Infection. *Cell Rep* 27, 1579-1596 e1577.
- 1126 Gummuluru, S., and Emerman, M. (1999). Cell cycle- and Vpr-mediated regulation of human  
1127 immunodeficiency virus type 1 expression in primary and transformed T-cell lines. *J Virol* 73,  
1128 5422-5430.
- 1129 Guo, Y., Dong, L., Qiu, X., Wang, Y., Zhang, B., Liu, H., Yu, Y., Zang, Y., Yang, M., and  
1130 Huang, Z. (2014). Structural basis for hijacking CBF-beta and CUL5 E3 ligase complex by  
1131 HIV-1 Vif. *Nature* 505, 229-233.
- 1132 Guy, B., Kieny, M.P., Riviere, Y., Le Peuch, C., Dott, K., Girard, M., Montagnier, L., and  
1133 Lecocq, J.P. (1987). HIV F/3' orf encodes a phosphorylated GTP-binding protein resembling  
1134 an oncogene product. *Nature* 330, 266-269.

- 1135 Harris, R.S., and Anderson, B.D. (2016). Evolutionary Paradigms from Ancient and Ongoing  
1136 Conflicts between the Lentiviral Vif Protein and Mammalian APOBEC3 Enzymes. *PLOS*  
1137 *Pathogens* 12, e1005958.
- 1138 He, J., Choe, S., Walker, R., Di Marzio, P., Morgan, D.O., and Landau, N.R. (1995). Human  
1139 immunodeficiency virus type 1 viral protein R (Vpr) arrests cells in the G2 phase of the cell  
1140 cycle by inhibiting p34cdc2 activity. *J Virol* 69, 6705-6711.
- 1141 He, Z., Zhang, W., Chen, G., Xu, R., and Yu, X.-F. (2008). Characterization of Conserved  
1142 Motifs in HIV-1 Vif Required for APOBEC3G and APOBEC3F Interaction. 381, 1000-1011.
- 1143 Hertz, E.P.T., Kruse, T., Davey, N.E., Lopez-Mendez, B., Sigurethsson, J.O., Montoya, G.,  
1144 Olsen, J.V., and Nilsson, J. (2016). A Conserved Motif Provides Binding Specificity to the  
1145 PP2A-B56 Phosphatase. *Mol Cell* 63, 686-695.
- 1146 Hultquist, J.F., Lengyel, J.A., Refsland, E.W., LaRue, R.S., Lackey, L., Brown, W.L., and  
1147 Harris, R.S. (2011). Human and rhesus APOBEC3D, APOBEC3F, APOBEC3G, and  
1148 APOBEC3H demonstrate a conserved capacity to restrict Vif-deficient HIV-1. *J Virol* 85,  
1149 11220-11234.
- 1150 Iwabu, Y., Kinomoto, M., Tatsumi, M., Fujita, H., Shimura, M., Tanaka, Y., Ishizaka, Y.,  
1151 Nolan, D., Mallal, S., Sata, T., *et al.* (2010). Differential anti-APOBEC3G activity of HIV-1 Vif  
1152 proteins derived from different subtypes. *J Biol Chem* 285, 35350-35358.
- 1153 Izumi, T., Io, K., Matsui, M., Shirakawa, K., Shinohara, M., Nagai, Y., Kawahara, M.,  
1154 Kobayashi, M., Kondoh, H., Misawa, N., *et al.* (2010). HIV-1 viral infectivity factor interacts  
1155 with TP53 to induce G2 cell cycle arrest and positively regulate viral replication. *Proc Natl*  
1156 *Acad Sci U S A* 107, 20798-20803.
- 1157 Jowett, J.B., Planelles, V., Poon, B., Shah, N.P., Chen, M.L., and Chen, I.S. (1995). The  
1158 human immunodeficiency virus type 1 vpr gene arrests infected T cells in the G2 + M phase  
1159 of the cell cycle. *J Virol* 69, 6304-6313.
- 1160 Kobayashi, M., Takaori-Kondo, A., Miyauchi, Y., Iwai, K., and Uchiyama, T. (2005).  
1161 Ubiquitination of APOBEC3G by an HIV-1 Vif-Cullin5-Elongin B-Elongin C complex is  
1162 essential for Vif function. *J Biol Chem* 280, 18573-18578.

1163 Koning, F.A., Newman, E.N., Kim, E.Y., Kunstman, K.J., Wolinsky, S.M., and Malim, M.H.  
1164 (2009). Defining APOBEC3 expression patterns in human tissues and hematopoietic cell  
1165 subsets. *J Virol* 83, 9474-9485.

1166 Laguette, N., Bregnard, C., Hue, P., Basbous, J., Yatim, A., Larroque, M., Kirchhoff, F.,  
1167 Constantinou, A., Sobhian, B., and Benkirane, M. (2014). Premature activation of the SLX4  
1168 complex by Vpr promotes G2/M arrest and escape from innate immune sensing. *Cell* 156,  
1169 134-145.

1170 Lee, S.J., Rodriguez-Bravo, V., Kim, H., Datta, S., and Foley, E.A. (2017). The PP2A(B56)  
1171 phosphatase promotes the association of Cdc20 with APC/C in mitosis. *J Cell Sci* 130, 1760-  
1172 1771.

1173 Letko, M., Booiman, T., Kootstra, N., Simon, V., and Ooms, M. (2015). Identification of the  
1174 HIV-1 Vif and Human APOBEC3G Protein Interface. *Cell Reports* 13, 1789-1799.

1175 Li, X., Scuderi, A., Letsou, A., and Virshup, D.M. (2002). B56-associated protein  
1176 phosphatase 2A is required for survival and protects from apoptosis in *Drosophila*  
1177 *melanogaster*. *Mol Cell Biol* 22, 3674-3684.

1178 Liu, M.K., Hawkins, N., Ritchie, A.J., Ganusov, V.V., Whale, V., Brackenridge, S., Li, H.,  
1179 Pavlicek, J.W., Cai, F., Rose-Abrahams, M., *et al.* (2013). Vertical T cell immunodominance  
1180 and epitope entropy determine HIV-1 escape. *J Clin Invest* 123, 380-393.

1181 Madsen, J.M., and Stoltzfus, C.M. (2005). An exonic splicing silencer downstream of the 3'  
1182 splice site A2 is required for efficient human immunodeficiency virus type 1 replication. *J*  
1183 *Virol* 79, 10478-10486.

1184 Marin, M., Rose, K.M., Kozak, S.L., and Kabat, D. (2003). HIV-1 Vif protein binds the editing  
1185 enzyme APOBEC3G and induces its degradation. *Nat Med* 9, 1398-1403.

1186 Matheson, N.J., Peden, A.A., and Lehner, P.J. (2014). Antibody-free magnetic cell sorting of  
1187 genetically modified primary human CD4+ T cells by one-step streptavidin affinity  
1188 purification. *PLoS One* 9, e111437.

1189 Matheson, N.J., Sumner, J., Wals, K., Rapiteanu, R., Weekes, M.P., Vigan, R., Weinelt, J.,  
1190 Schindler, M., Antrobus, R., Costa, A.S., *et al.* (2015). Cell Surface Proteomic Map of HIV

1191 Infection Reveals Antagonism of Amino Acid Metabolism by Vpu and Nef. *Cell Host Microbe*  
1192 *18*, 409-423.

1193 Mehle, A., Strack, B., Ancuta, P., Zhang, C., McPike, M., and Gabuzda, D. (2004). Vif  
1194 overcomes the innate antiviral activity of APOBEC3G by promoting its degradation in the  
1195 ubiquitin-proteasome pathway. *J Biol Chem* *279*, 7792-7798.

1196 Mehle, A., Wilson, H., Zhang, C., Brazier, A.J., McPike, M., Pery, E., and Gabuzda, D.  
1197 (2007). Identification of an APOBEC3G Binding Site in Human Immunodeficiency Virus Type  
1198 1 Vif and Inhibitors of Vif-APOBEC3G Binding. *J Virol* *81*, 13235-13241.

1199 Menzies, S.A., Volkmar, N., van den Boomen, D.J., Timms, R.T., Dickson, A.S., Nathan,  
1200 J.A., and Lehner, P.J. (2018). The sterol-responsive RNF145 E3 ubiquitin ligase mediates  
1201 the degradation of HMG-CoA reductase together with gp78 and Hrd1. *Elife* *7*.

1202 Miles, A.L., Burr, S.P., Grice, G.L., and Nathan, J.A. (2017). The vacuolar-ATPase complex  
1203 and assembly factors, TMEM199 and CCDC115, control HIF1alpha prolyl hydroxylation by  
1204 regulating cellular iron levels. *Elife* *6*.

1205 Mulder, L.C., Harari, A., and Simon, V. (2008). Cytidine deamination induced HIV-1 drug  
1206 resistance. *Proc Natl Acad Sci U S A* *105*, 5501-5506.

1207 Naamati, A., Williamson, J.C., Greenwood, E.J., Marelli, S., Lehner, P.J., and Matheson,  
1208 N.J. (2019). Functional proteomic atlas of HIV infection in primary human CD4+ T cells. *Elife*  
1209 *8*.

1210 Nakano, Y., Aso, H., Soper, A., Yamada, E., Moriwaki, M., Juarez-Fernandez, G., Koyanagi,  
1211 Y., and Sato, K. (2017). A conflict of interest: the evolutionary arms race between  
1212 mammalian APOBEC3 and lentiviral Vif. *Retrovirology* *14*, 31.

1213 Nakashima, M., Ode, H., Kawamura, T., Kitamura, S., Naganawa, Y., Awazu, H., Tsuzuki,  
1214 S., Matsuoka, K., Nemoto, M., Hachiya, A., *et al.* (2016). Structural Insights into HIV-1 Vif-  
1215 APOBEC3F Interaction. *90*, 1034-1047.

1216 Nasa, I., and Kettenbach, A.N. (2018). Coordination of Protein Kinase and Phosphoprotein  
1217 Phosphatase Activities in Mitosis. *Front Cell Dev Biol* *6*, 30.

- 1218 Ooms, M., Letko, M., and Simon, V. (2016). The structural interface between HIV-1 Vif and  
1219 human APOBEC3H. *JVI.02289-02216*.
- 1220 Parrish, N.F., Gao, F., Li, H., Giorgi, E.E., Barbian, H.J., Parrish, E.H., Zajic, L., Iyer, S.S.,  
1221 Decker, J.M., Kumar, A., *et al.* (2013). Phenotypic properties of transmitted founder HIV-1.  
1222 *Proc Natl Acad Sci U S A* *110*, 6626-6633.
- 1223 Peng, G., Greenwell-Wild, T., Nares, S., Jin, W., Lei, K.J., Rangel, Z.G., Munson, P.J., and  
1224 Wahl, S.M. (2007). Myeloid differentiation and susceptibility to HIV-1 are linked to APOBEC3  
1225 expression. *Blood* *110*, 393-400.
- 1226 R Core Team (2019). R: A language and environment for statistical computing (Vienna,  
1227 Austria: R Foundation for Statistical Computing).
- 1228 Refsland, E.W., Stenglein, M.D., Shindo, K., Albin, J.S., Brown, W.L., and Harris, R.S.  
1229 (2010). Quantitative profiling of the full APOBEC3 mRNA repertoire in lymphocytes and  
1230 tissues: implications for HIV-1 restriction. *Nucleic Acids Res* *38*, 4274-4284.
- 1231 Richards, C., John, Demir, Ö., Nadine, Elizabeth, Allison, Brett, John, John, Daniel, *et al.*  
1232 (2015). The Binding Interface between Human APOBEC3F and HIV-1 Vif Elucidated by  
1233 Genetic and Computational Approaches. *Cell Reports* *13*, 1781-1788.
- 1234 Ritchie, M.E., Phipson, B., Wu, D., Hu, Y., Law, C.W., Shi, W., and Smyth, G.K. (2015).  
1235 limma powers differential expression analyses for RNA-sequencing and microarray studies.  
1236 *Nucleic Acids Res* *43*, e47.
- 1237 Rogel, M.E., Wu, L.I., and Emerman, M. (1995). The human immunodeficiency virus type 1  
1238 vpr gene prevents cell proliferation during chronic infection. *J Virol* *69*, 882-888.
- 1239 Russell, R.A., and Pathak, V.K. (2007). Identification of Two Distinct Human  
1240 Immunodeficiency Virus Type 1 Vif Determinants Critical for Interactions with Human  
1241 APOBEC3G and APOBEC3F. *J Virol* *81*, 8201-8210.
- 1242 Sakai, K., Dimas, J., and Lenardo, M.J. (2006). The Vif and Vpr accessory proteins  
1243 independently cause HIV-1-induced T cell cytopathicity and cell cycle arrest. *Proc Natl Acad*  
1244 *Sci U S A* *103*, 3369-3374.



- 1245 Schmittgen, T.D., and Livak, K.J. (2008). Analyzing real-time PCR data by the comparative  
1246 C(T) method. *Nat Protoc* 3, 1101-1108.
- 1247 Schwammle, V., Leon, I.R., and Jensen, O.N. (2013). Assessment and improvement of  
1248 statistical tools for comparative proteomics analysis of sparse data sets with few  
1249 experimental replicates. *J Proteome Res* 12, 3874-3883.
- 1250 Sheehy, A.M., Gaddis, N.C., Choi, J.D., and Malim, M.H. (2002). Isolation of a human gene  
1251 that inhibits HIV-1 infection and is suppressed by the viral Vif protein. *Nature* 418, 646-650.
- 1252 Sheehy, A.M., Gaddis, N.C., and Malim, M.H. (2003). The antiretroviral enzyme APOBEC3G  
1253 is degraded by the proteasome in response to HIV-1 Vif. *Nat Med* 9, 1404-1407.
- 1254 Sievers, F., and Higgins, D.G. (2014). Clustal Omega, accurate alignment of very large  
1255 numbers of sequences. *Methods Mol Biol* 1079, 105-116.
- 1256 Simon, J.H., Southerling, T.E., Peterson, J.C., Meyer, B.E., and Malim, M.H. (1995).  
1257 Complementation of vif-defective human immunodeficiency virus type 1 by primate, but not  
1258 nonprimate, lentivirus vif genes. *J Virol* 69, 4166-4172.
- 1259 Simon, V., Zennou, V., Murray, D., Huang, Y., Ho, D.D., and Bieniasz, P.D. (2005a). Natural  
1260 variation in Vif: differential impact on APOBEC3G/3F and a potential role in HIV-1  
1261 diversification. *PLoS Pathog* 1, e6.
- 1262 Simon, V., Zennou, V., Murray, D., Huang, Y., Ho, D.D., and Bieniasz, P.D. (2005b). Natural  
1263 Variation in Vif: Differential Impact on APOBEC3G/3F and a Potential Role in HIV-1  
1264 Diversification. *PLoS Pathogens* 1, e6.
- 1265 Stopak, K., de Noronha, C., Yonemoto, W., and Greene, W.C. (2003). HIV-1 Vif blocks the  
1266 antiviral activity of APOBEC3G by impairing both its translation and intracellular stability. *Mol*  
1267 *Cell* 12, 591-601.
- 1268 Swingle, M., Ni, L., and Honkanen, R.E. (2007). Small-molecule inhibitors of ser/thr protein  
1269 phosphatases: specificity, use and common forms of abuse. *Methods Mol Biol* 365, 23-38.
- 1270 Vallardi, G., Allan, L.A., Crozier, L., and Saurin, A.T. (2019). Division of labour between  
1271 PP2A-B56 isoforms at the centromere and kinetochore. *Elife* 8.



1272 van den Boomen, D.J., Timms, R.T., Grice, G.L., Stagg, H.R., Skodt, K., Dougan, G.,  
1273 Nathan, J.A., and Lehner, P.J. (2014). TMEM129 is a Derlin-1 associated ERAD E3 ligase  
1274 essential for virus-induced degradation of MHC-I. *Proc Natl Acad Sci U S A* *111*, 11425-  
1275 11430.

1276 Wang, J., Shackelford, J.M., Casella, C.R., Shivers, D.K., Rapaport, E.L., Liu, B., Yu, X.F.,  
1277 and Finkel, T.H. (2007). The Vif accessory protein alters the cell cycle of human  
1278 immunodeficiency virus type 1 infected cells. *Virology* *359*, 243-252.

1279 Wang, J., Wang, Z., Yu, T., Yang, H., Virshup, D.M., Kops, G.J., Lee, S.H., Zhou, W., Li, X.,  
1280 Xu, W., *et al.* (2016). Crystal structure of a PP2A B56-BubR1 complex and its implications  
1281 for PP2A substrate recruitment and localization. *Protein Cell* *7*, 516-526.

1282 Wang, Q., and Lee, C. (2007). Distinguishing Functional Amino Acid Covariation from  
1283 Background Linkage Disequilibrium in HIV Protease and Reverse Transcriptase. *Plos One* *2*.  
1284 Wickham, H. (2009). *Ggplot2 : elegant graphics for data analysis* (New York: Springer).

1285 Willey, R.L., Maldarelli, F., Martin, M.A., and Strebel, K. (1992). Human immunodeficiency  
1286 virus type 1 Vpu protein induces rapid degradation of CD4. *J Virol* *66*, 7193-7200.

1287 Wlodarchak, N., and Xing, Y. (2016). PP2A as a master regulator of the cell cycle. *Crit Rev*  
1288 *Biochem Mol Biol* *51*, 162-184.

1289 Yamashita, T., Kamada, K., Hatcho, K., Adachi, A., and Nomaguchi, M. (2008). Identification  
1290 of amino acid residues in HIV-1 Vif critical for binding and exclusion of APOBEC3G/F.  
1291 *Microbes Infect* *10*, 1142-1149.

1292 Yang, J., and Phiel, C. (2010). Functions of B56-containing PP2As in major developmental  
1293 and cancer signaling pathways. *Life sciences* *87*, 659-666.

1294 Yu, G.C., Lam, T.T.Y., Zhu, H.C., and Guan, Y. (2018). Two Methods for Mapping and  
1295 Visualizing Associated Data on Phylogeny Using Ggtree. *Molecular biology and evolution*  
1296 *35*, 3041-3043.

1297 Yu, X., Yu, Y., Liu, B., Luo, K., Kong, W., Mao, P., and Yu, X.F. (2003). Induction of  
1298 APOBEC3G ubiquitination and degradation by an HIV-1 Vif-Cul5-SCF complex. *Science*  
1299 *302*, 1056-1060.

1300 Zhao, K., Du, J., Rui, Y., Zheng, W., Kang, J., Hou, J., Wang, K., Zhang, W., Simon, V.A.,  
1301 and Yu, X.F. (2015). Evolutionarily conserved pressure for the existence of distinct G2/M cell  
1302 cycle arrest and A3H inactivation functions in HIV-1 Vif. *Cell cycle* 14, 838-847.

1303

**Figure 1****A**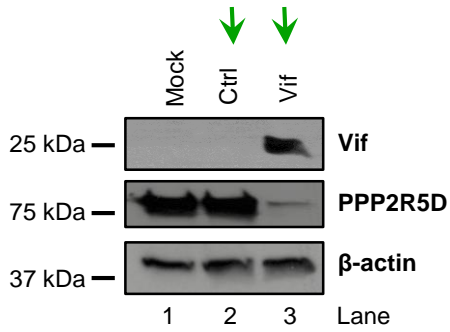**B**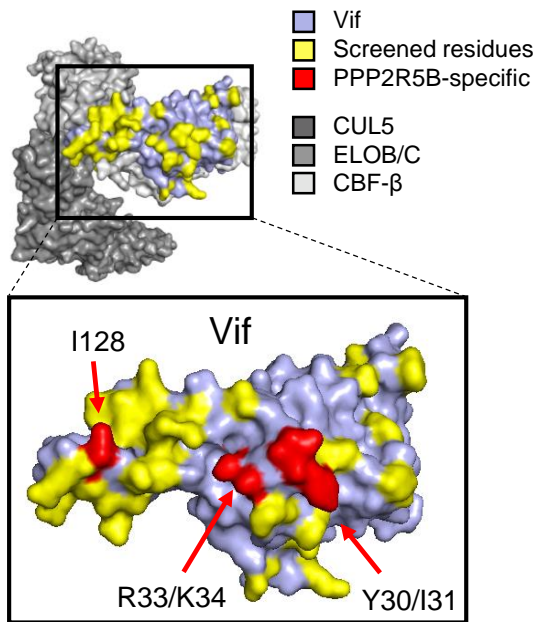**C**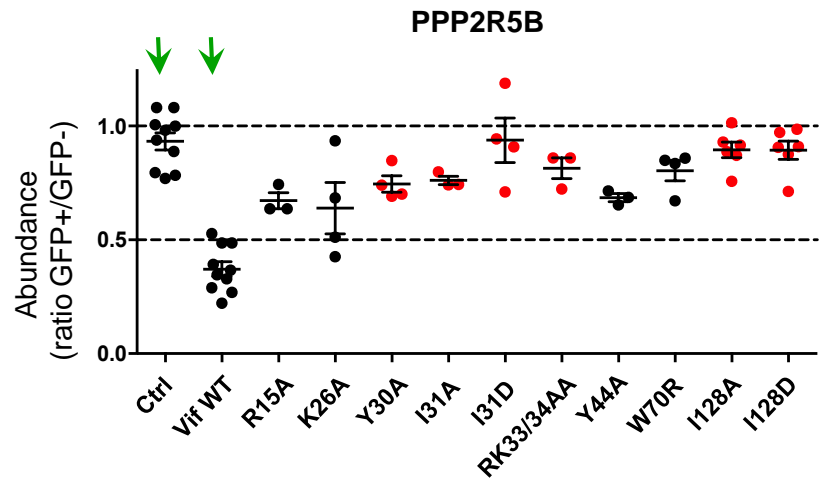**D**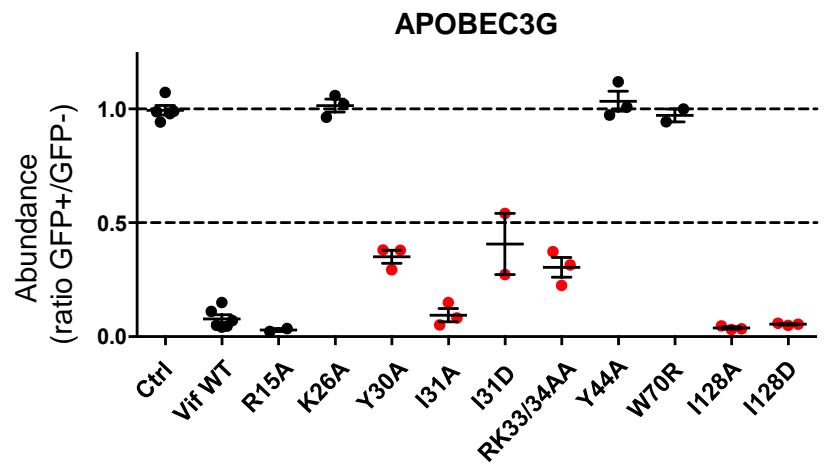**E**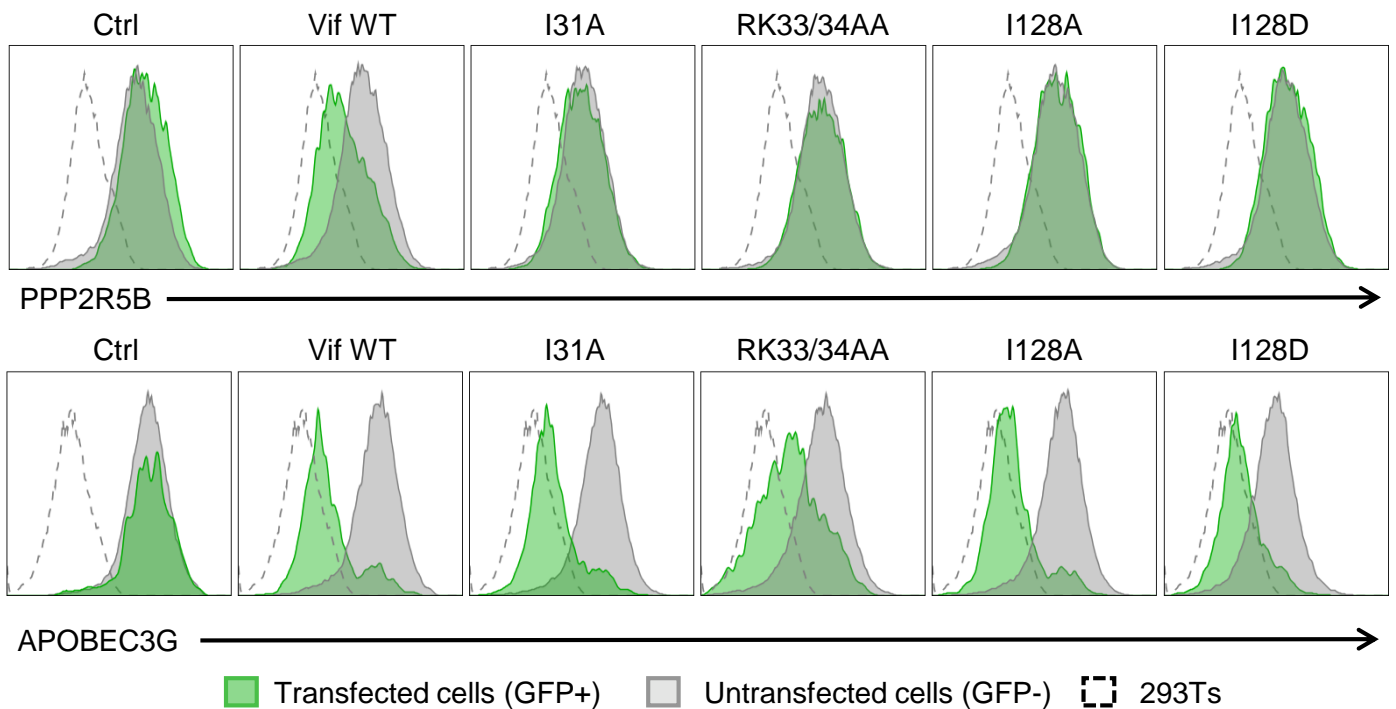

**Figure 2****A**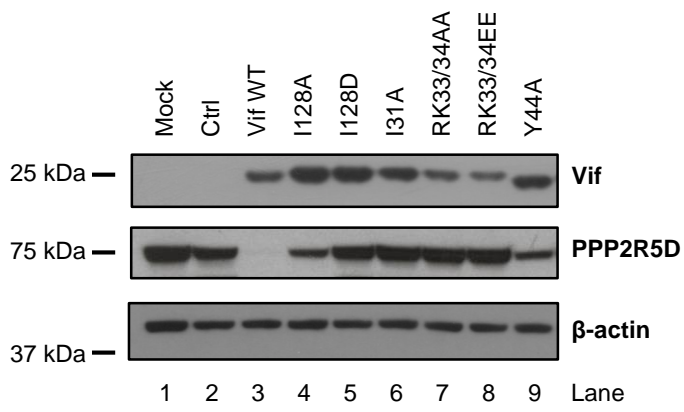**B**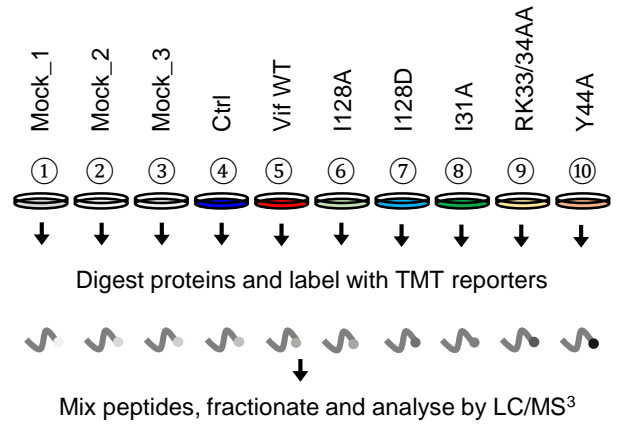**C**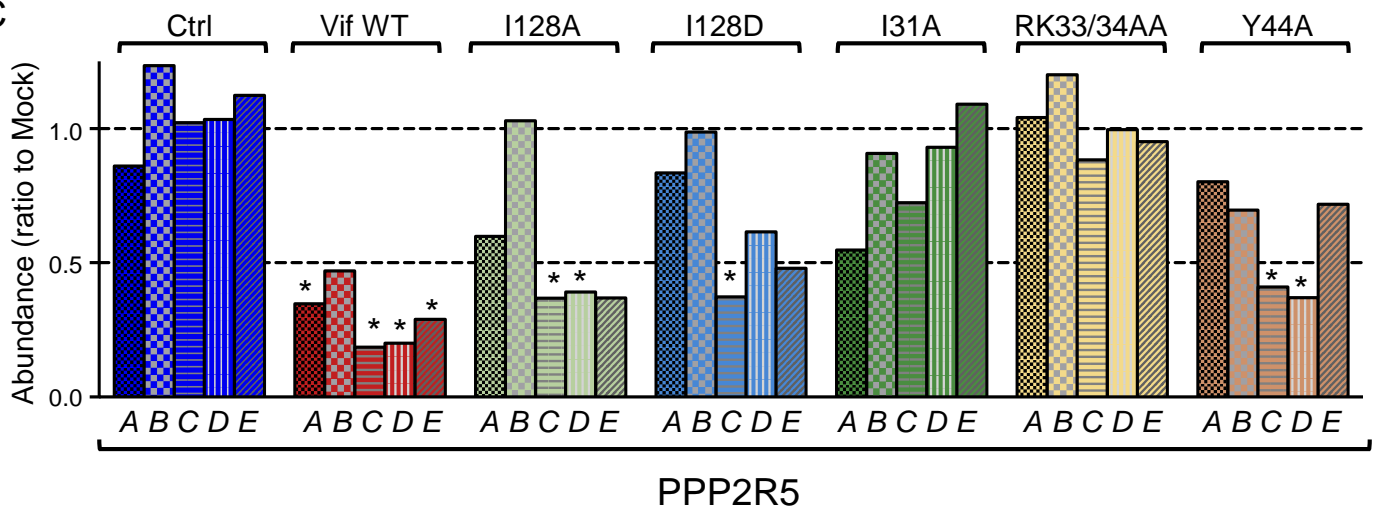**D**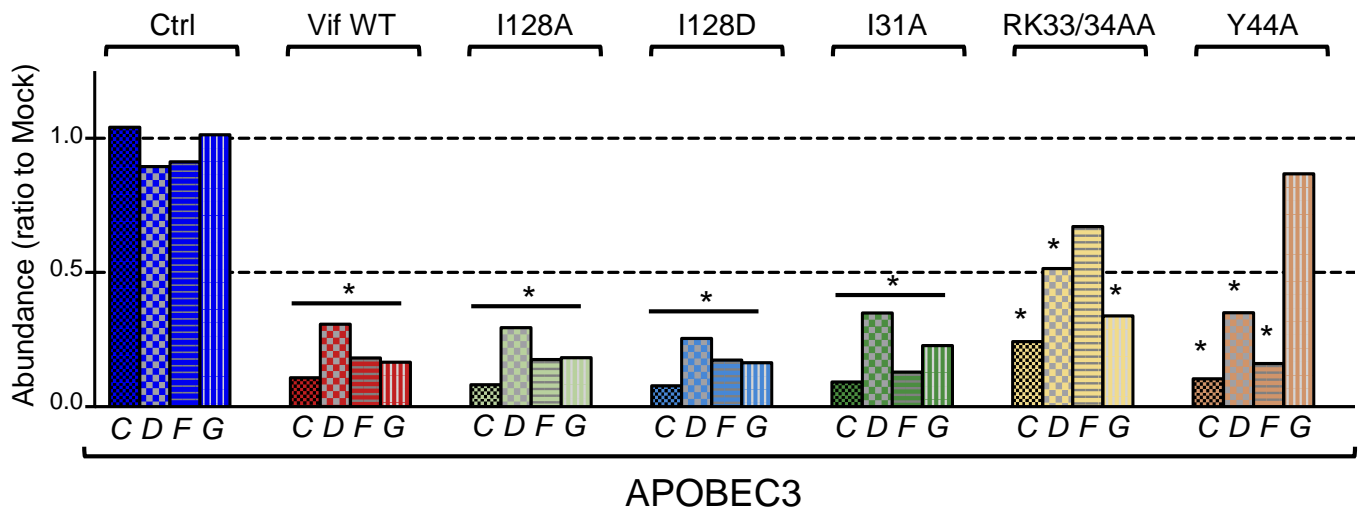

**Figure 3**

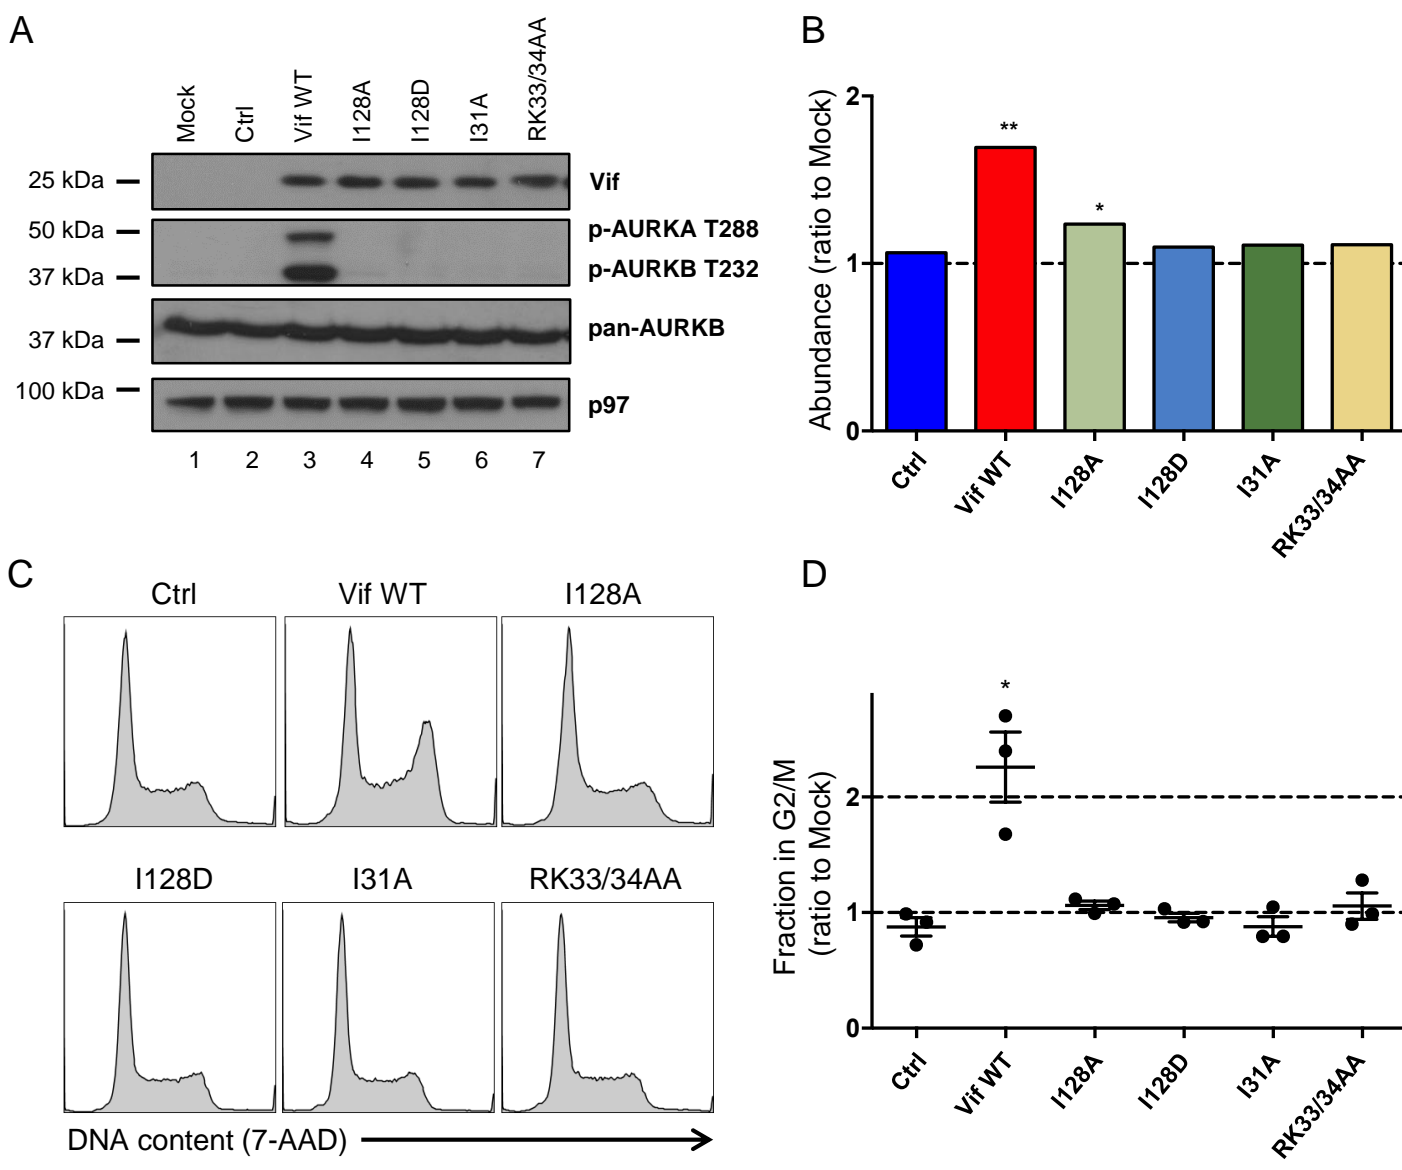

**Figure 4**

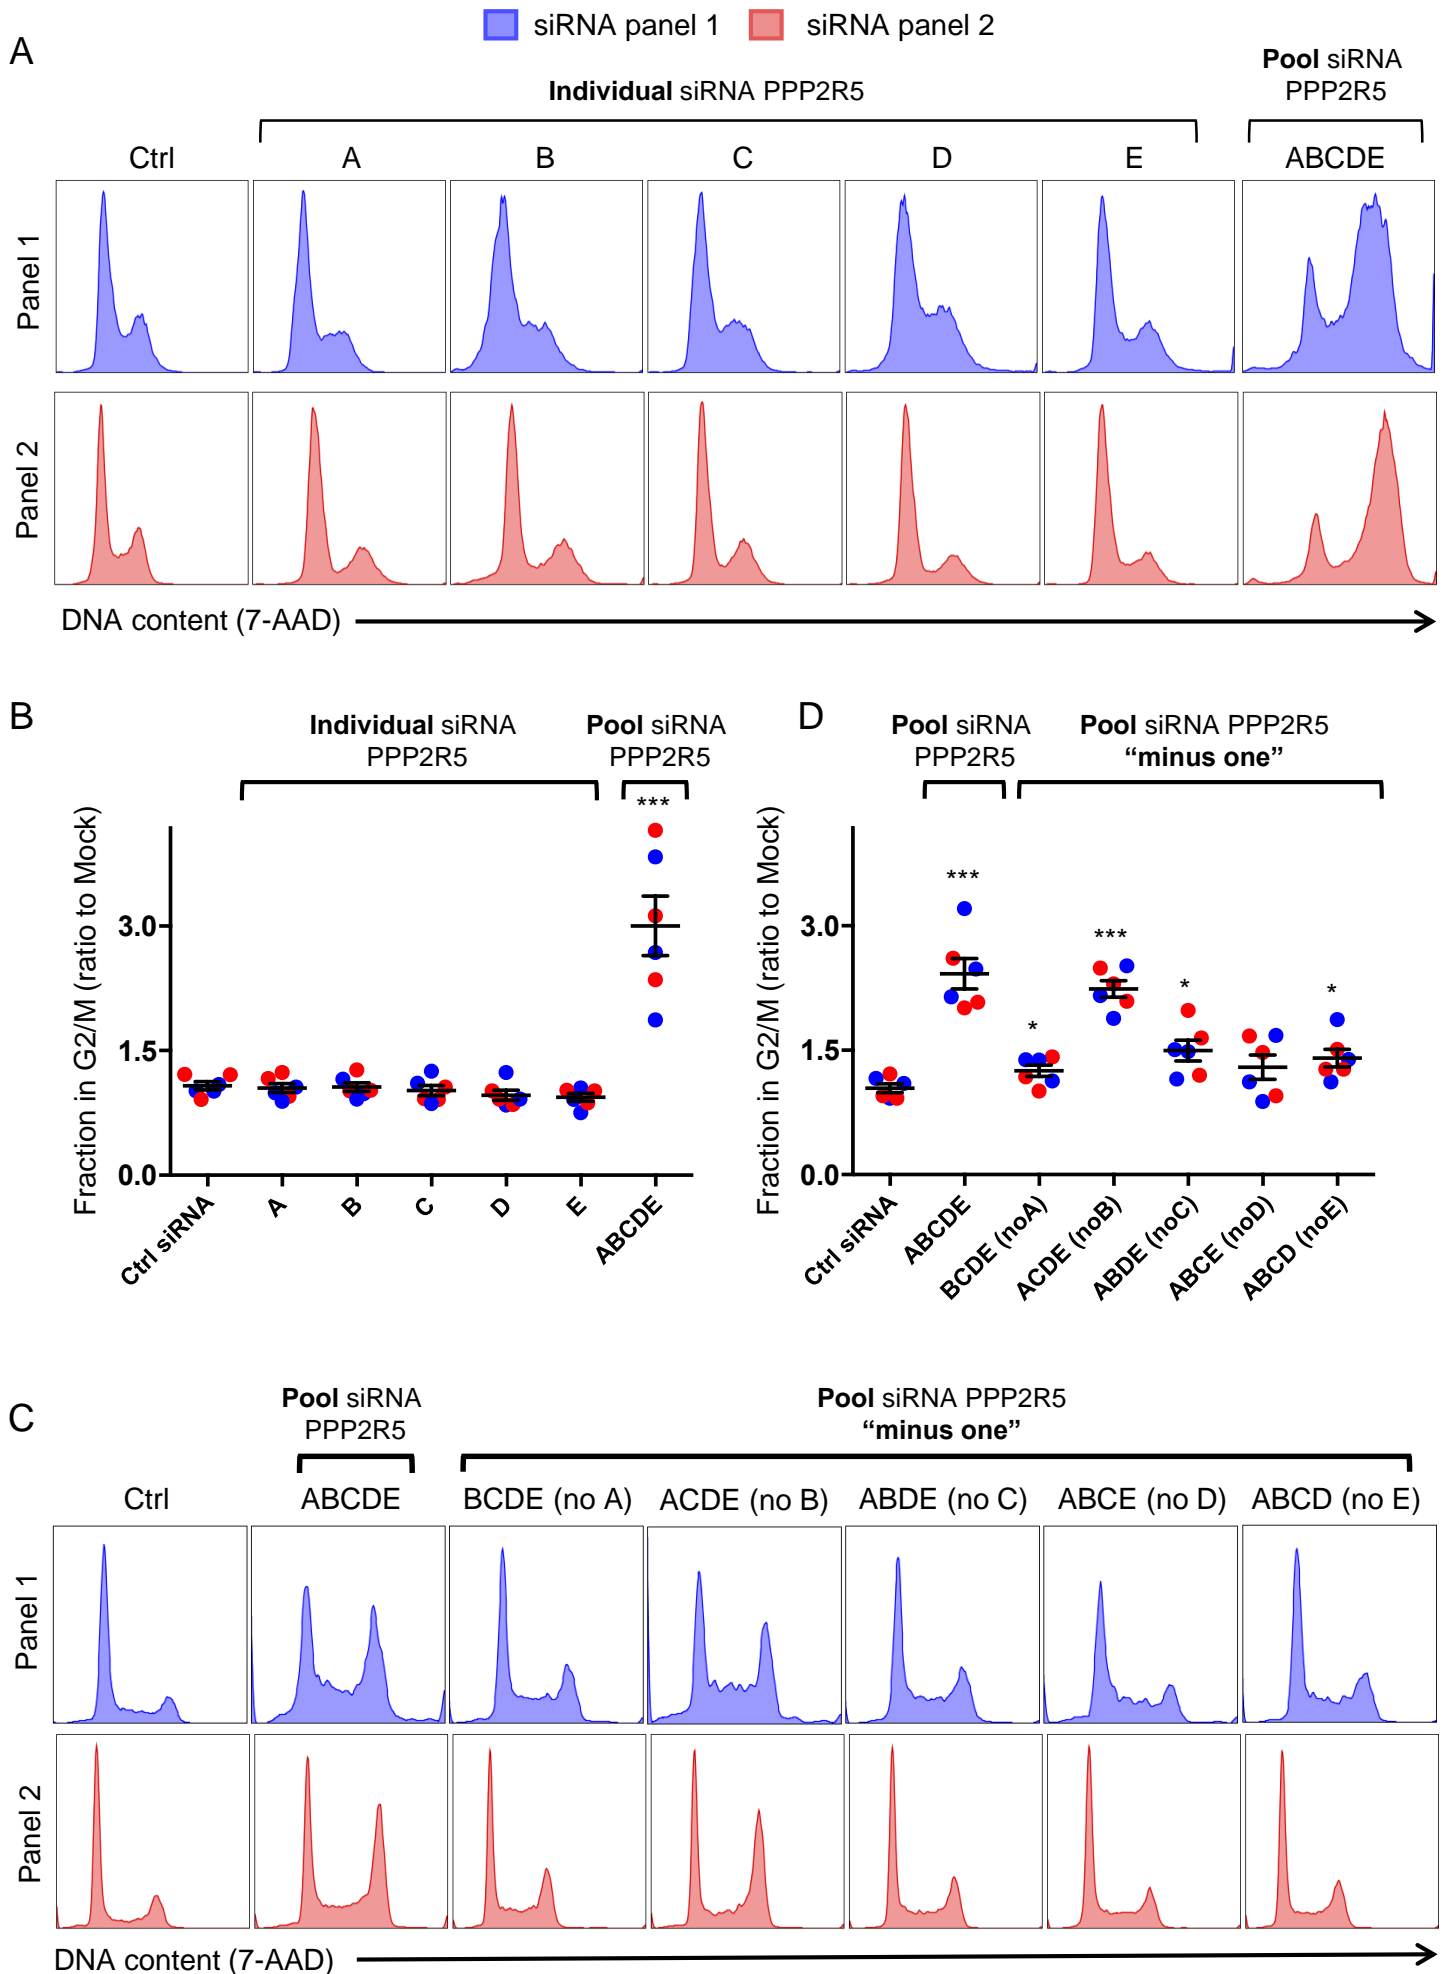

**Figure 5**

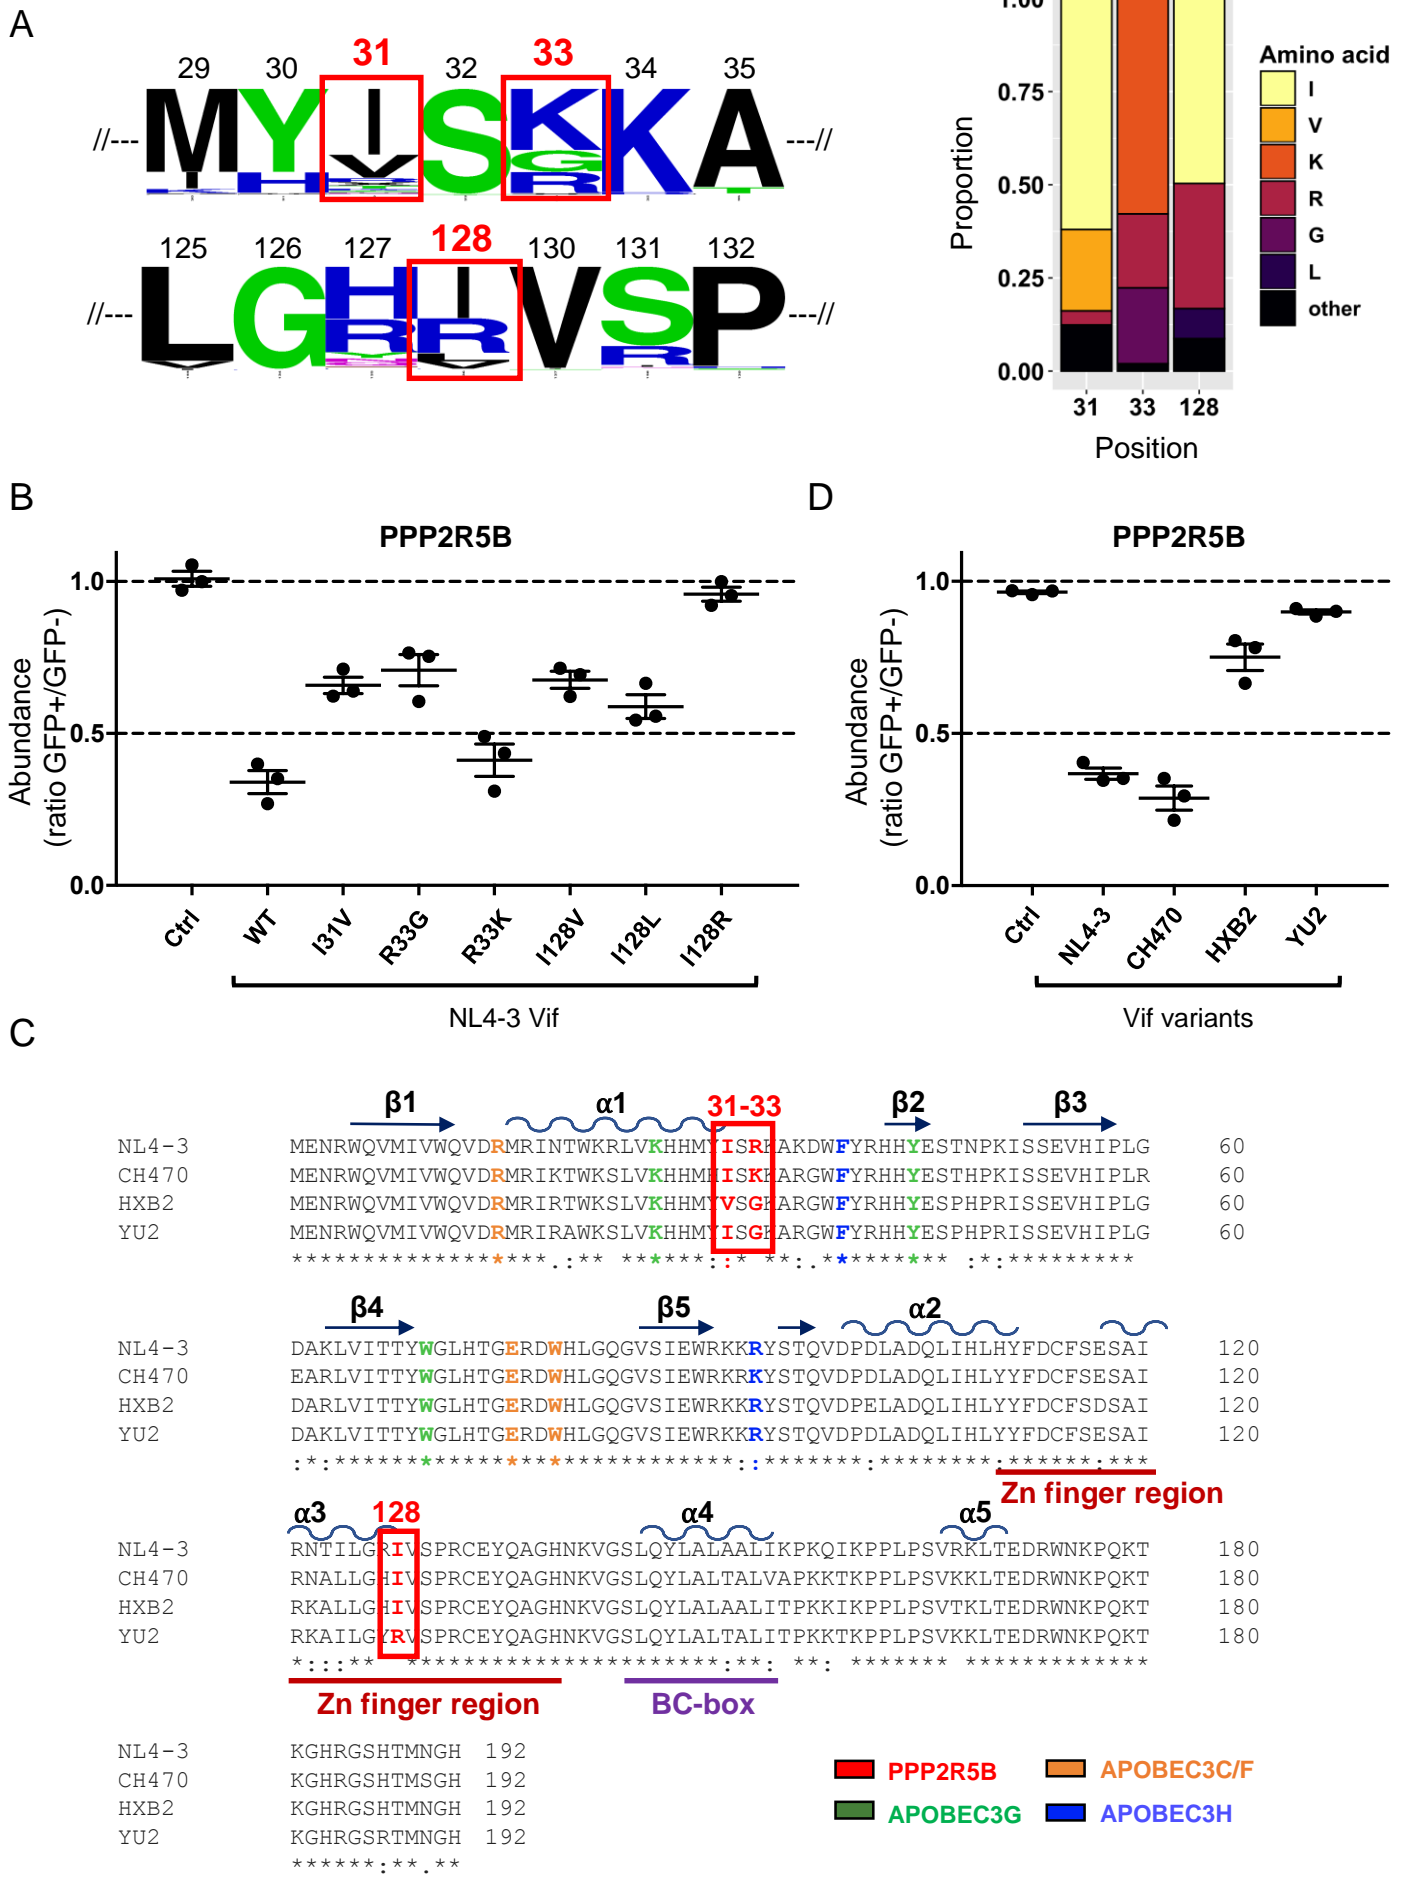

**Figure 6****A**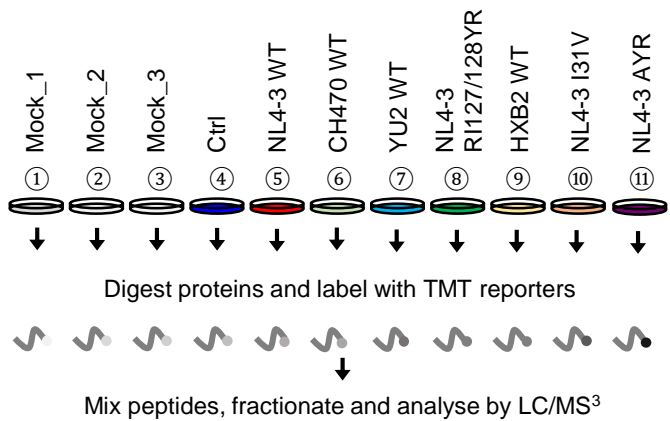**D**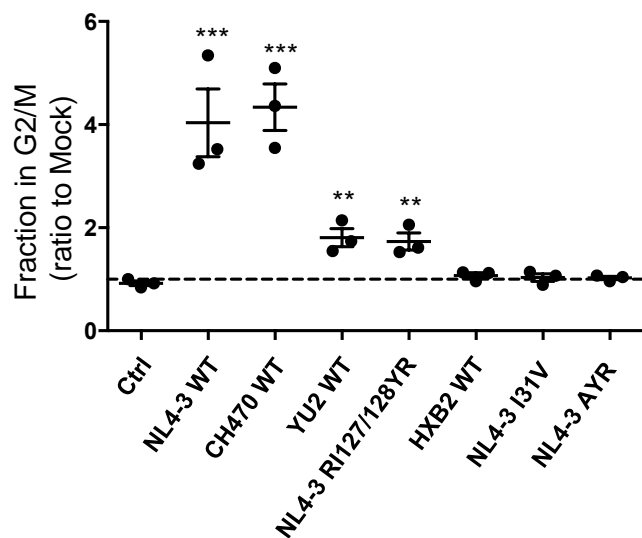**B**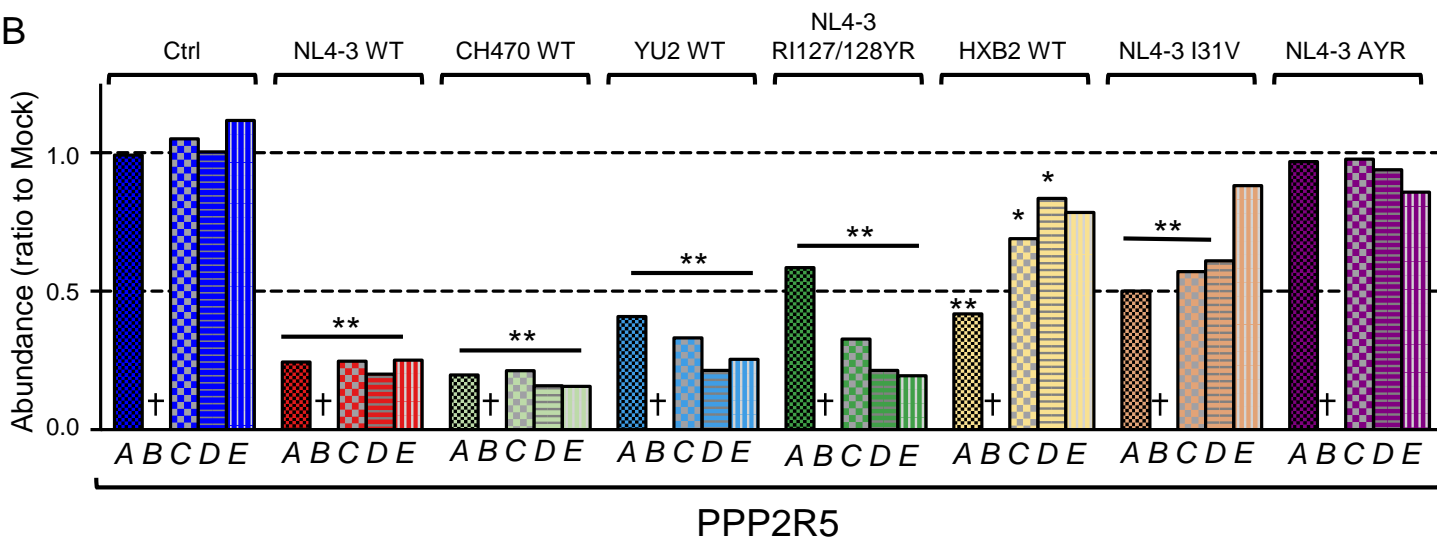**C**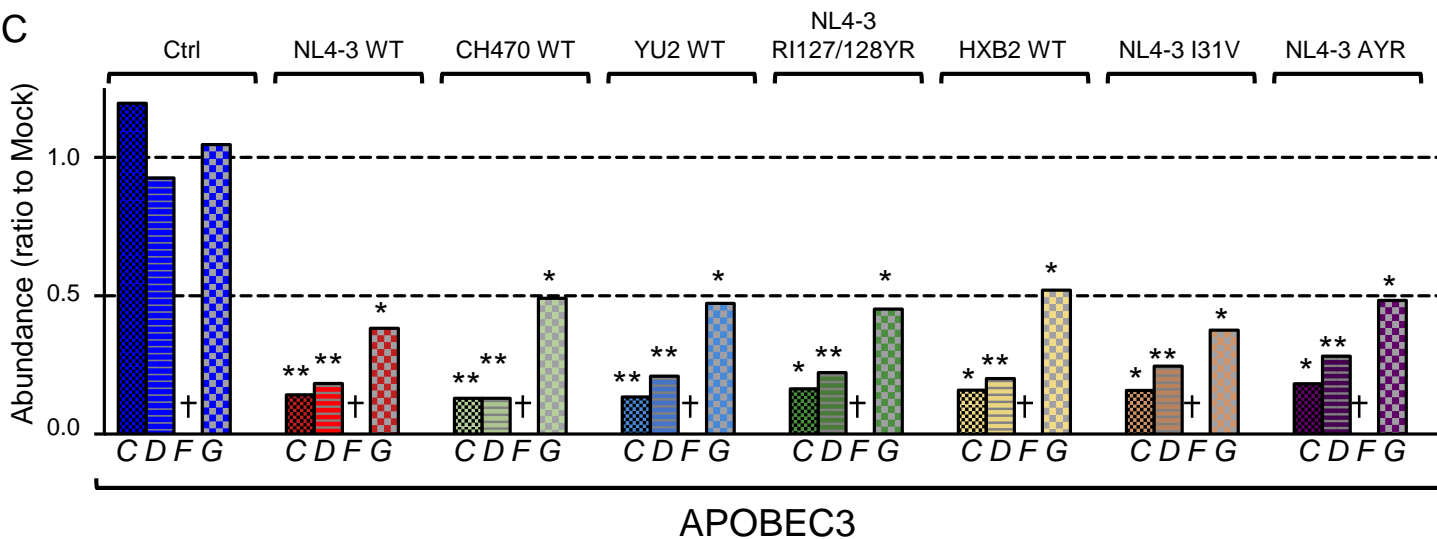



**Figure 7**

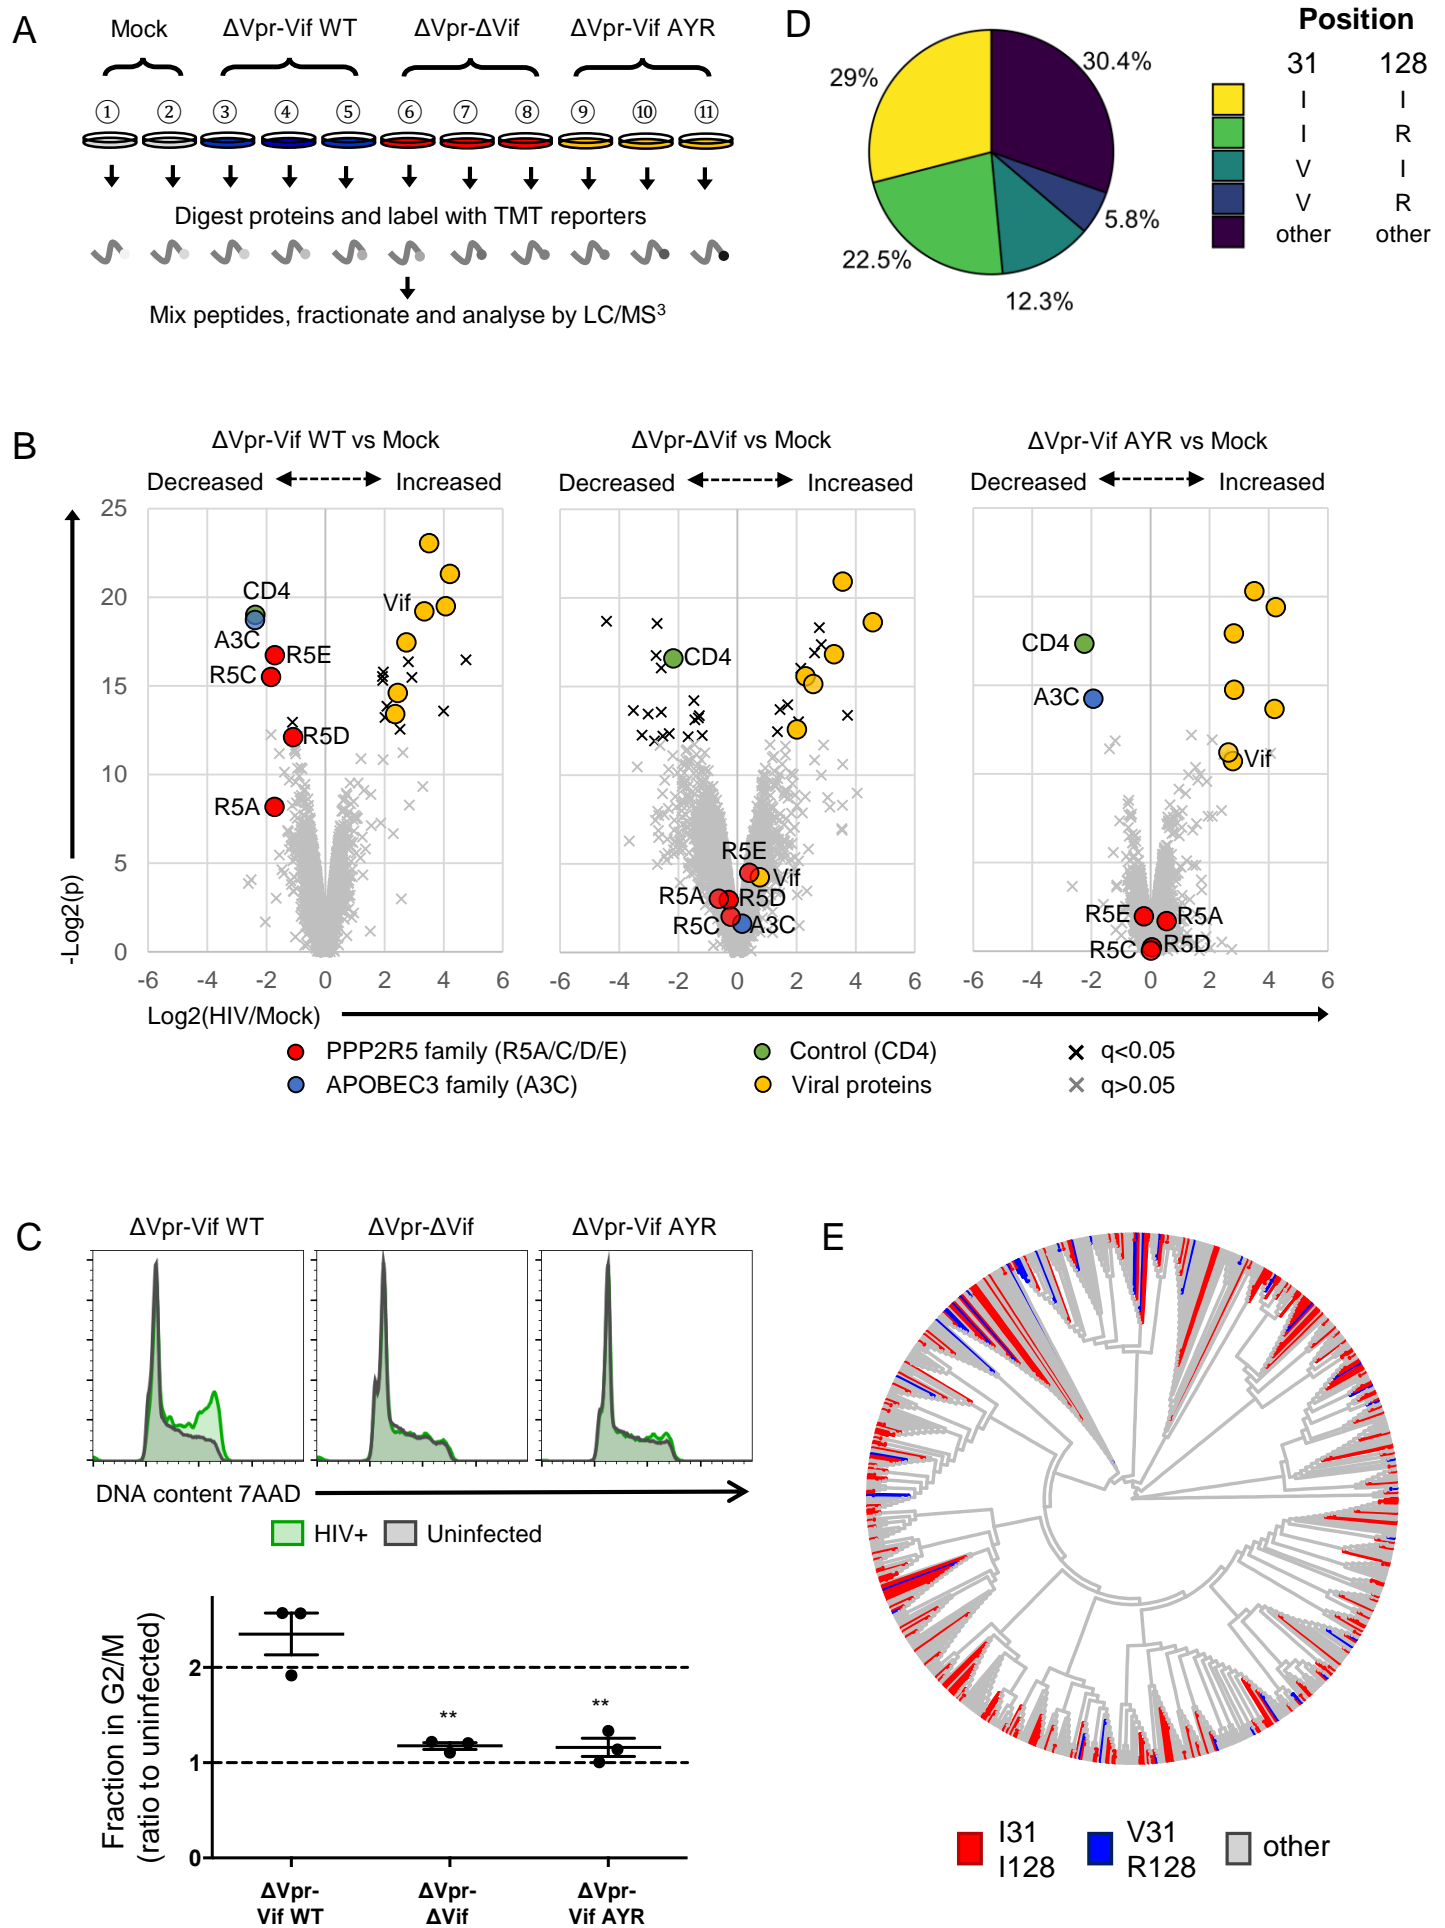

# Figure 1–figure supplement 1

A

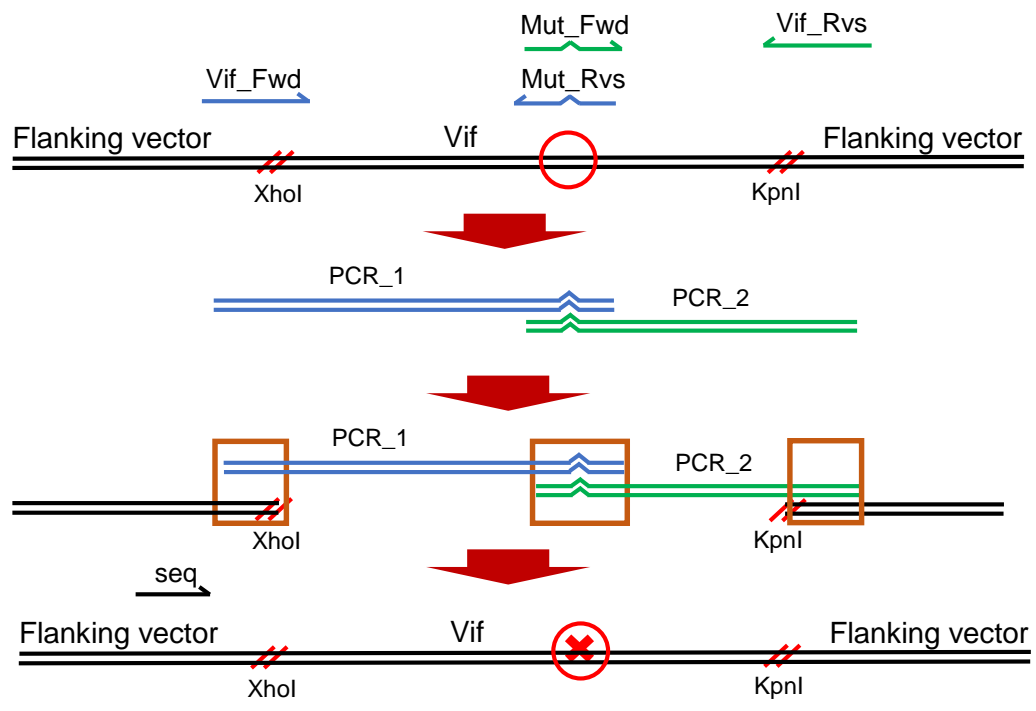

B

293T cells stably expressing HA-tagged PPP2R5B or APOBEC3G

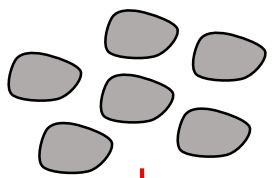

Transfect with GFP-P2A-Vif mutant library

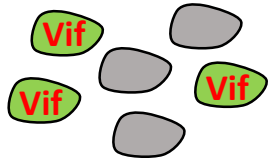

Analyse by intracellular flow cytometry

C

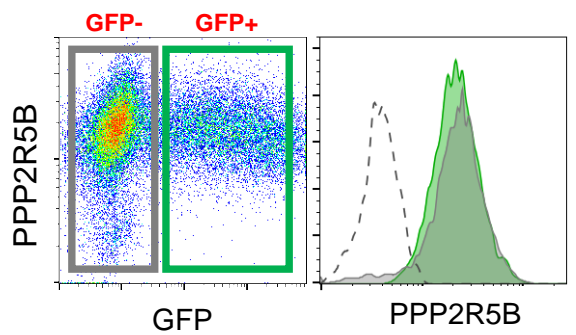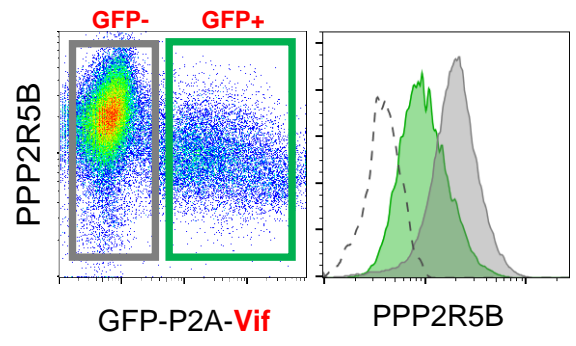

- Transfected cells (GFP+)
- Untransfected cells (GFP-)
- 293Ts

Figure 1–figure supplement 2

A

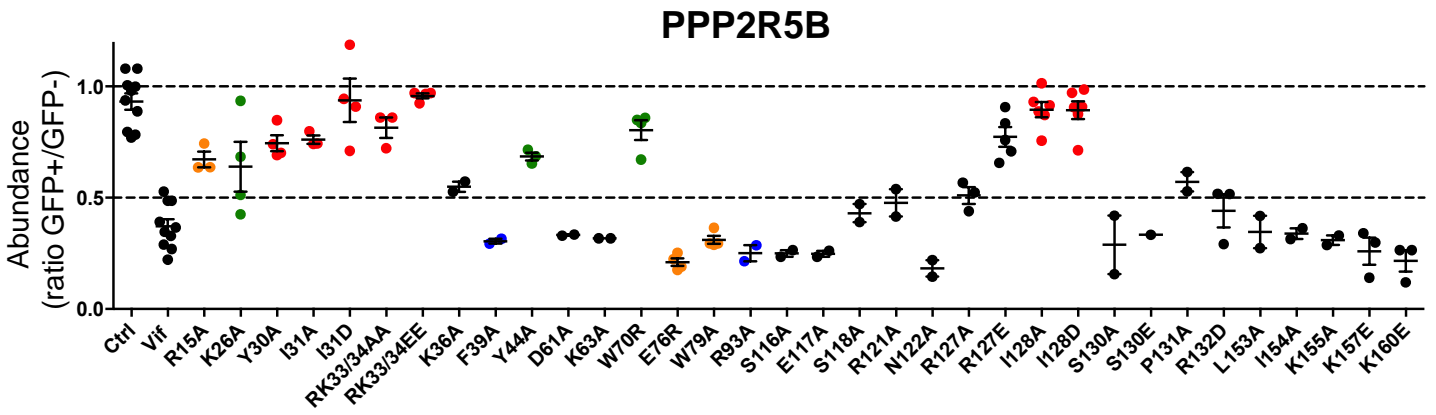

B

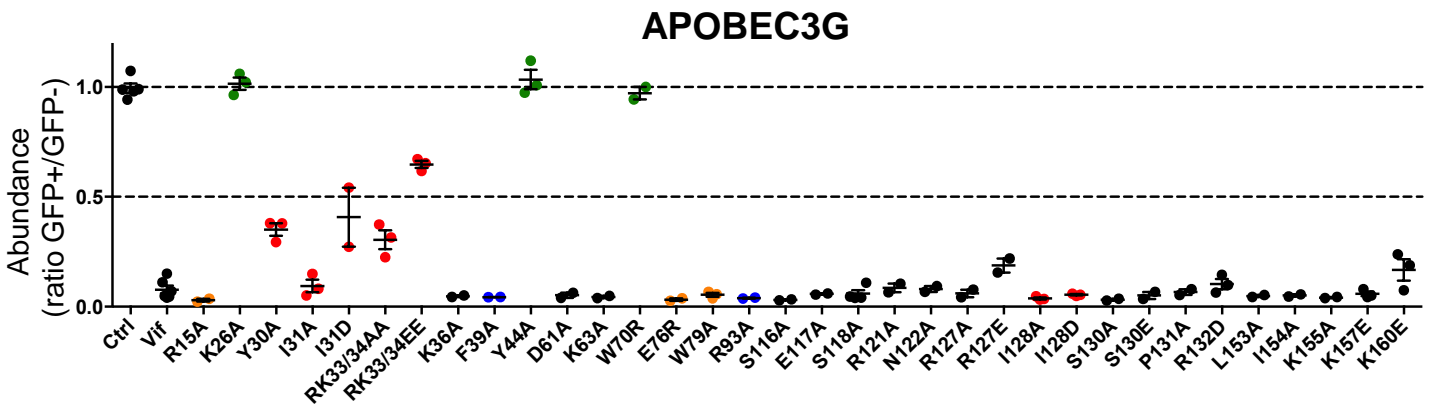

C

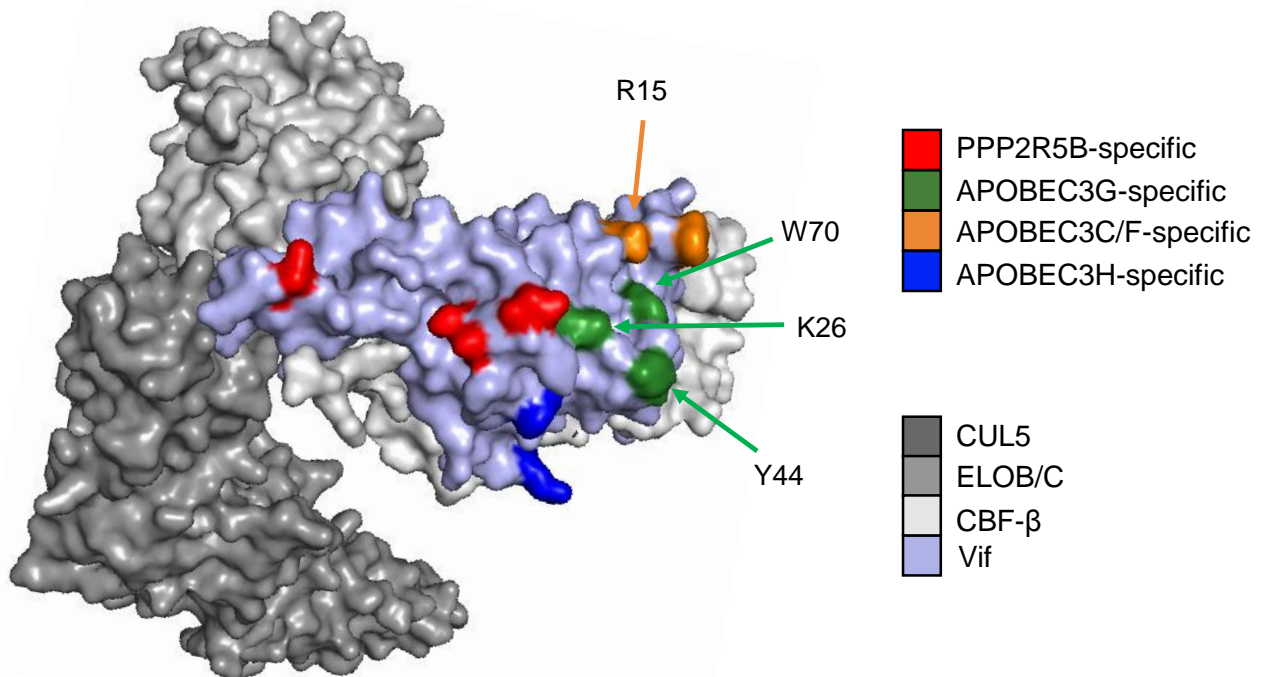

Figure 2—figure supplement 1

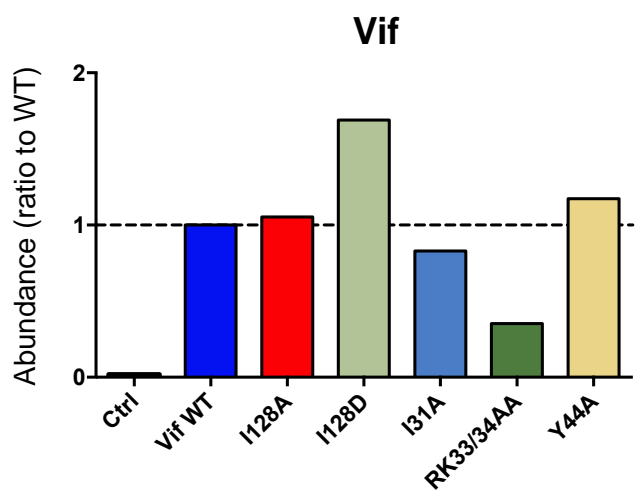

Figure 2–figure supplement 2

PPP2R5A

- Mock
- Ctrl
- Vif WT

| PPP2R5A protein abundance (normalized, unscaled) |        |        |                    |              |      |        |
|--------------------------------------------------|--------|--------|--------------------|--------------|------|--------|
| Mock                                             |        |        |                    |              | Ctrl | Vif WT |
| Mock_1                                           | Mock_2 | Mock_3 | Mean ( $\bar{x}$ ) | St. dev. (S) |      |        |
| 1915                                             | 1696   | 2125   | 1912               | 214          | 1647 | 665    |

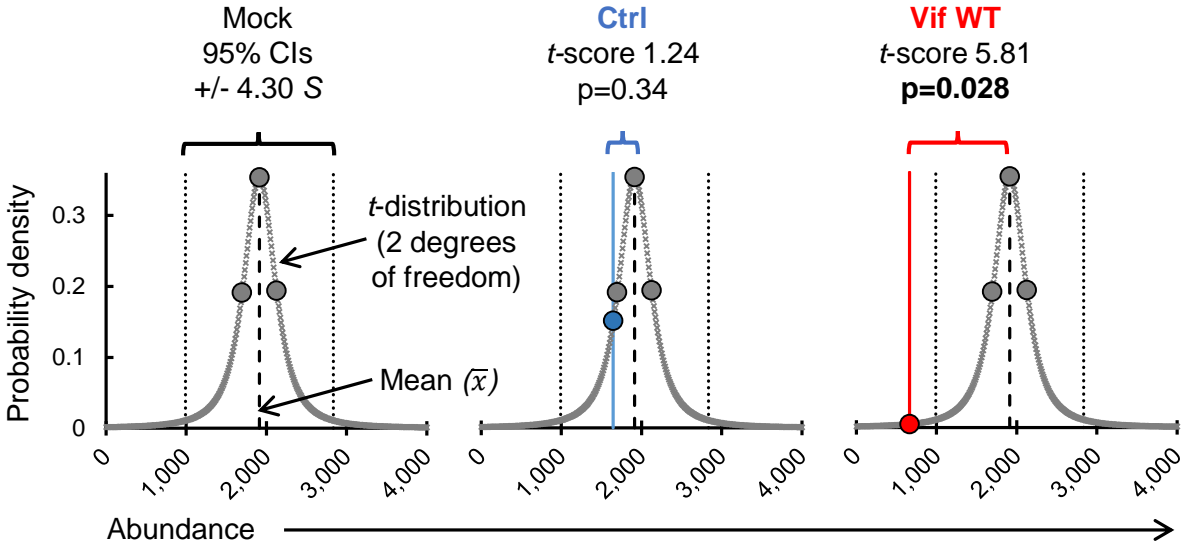

**Figure 3–figure supplement 1**

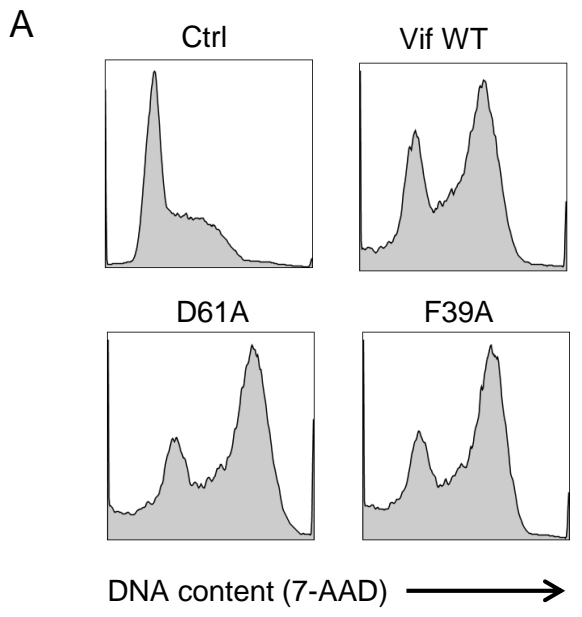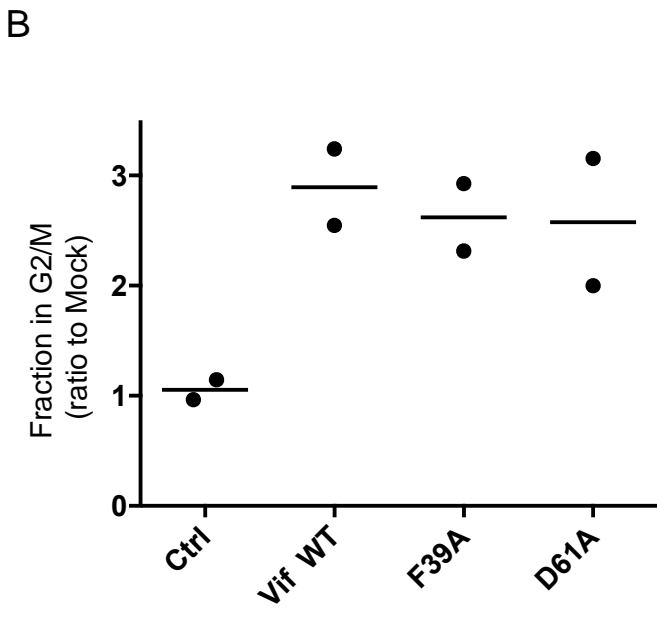

Figure 3—figure supplement 2

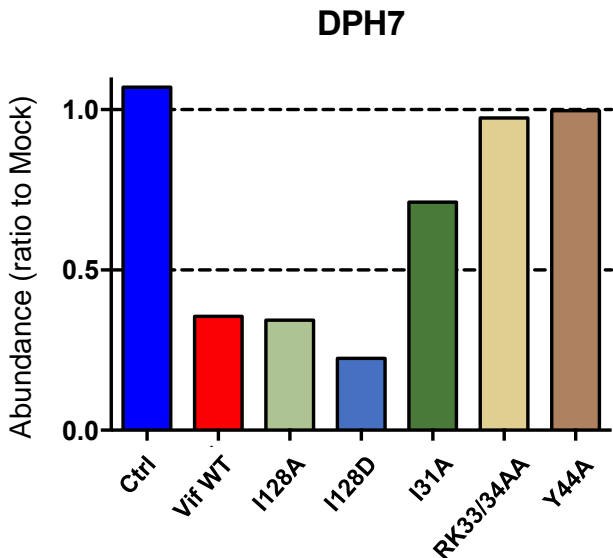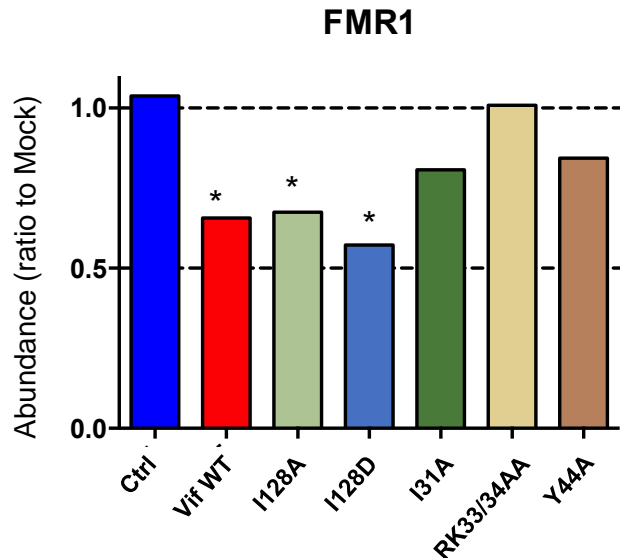

**Figure 4-figure supplement 1**

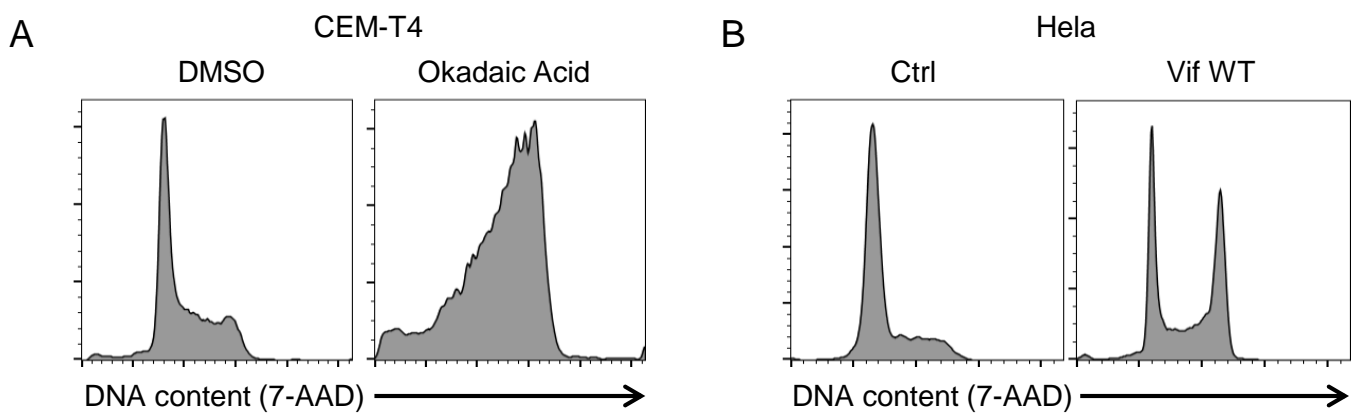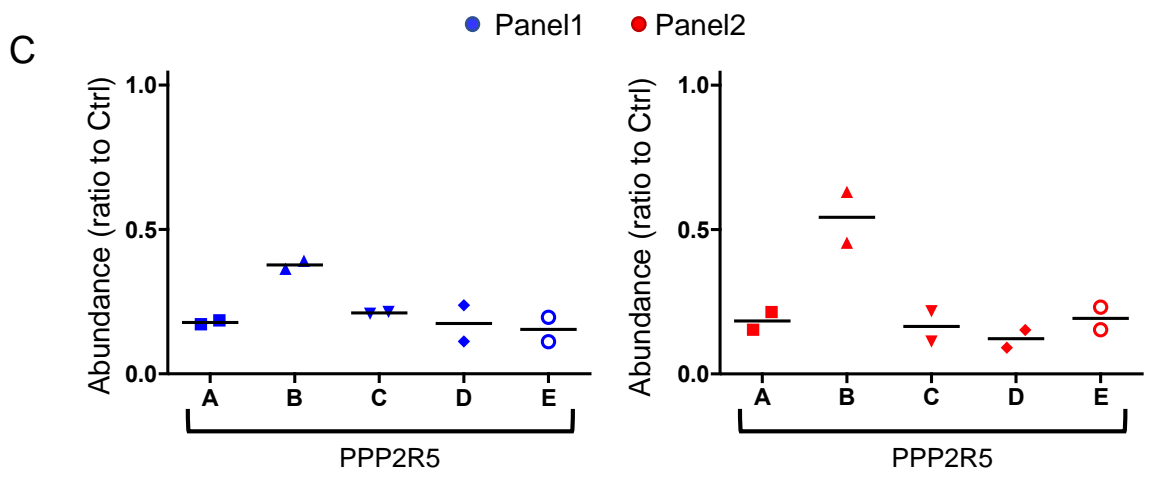



**Figure 4-figure supplement 2**

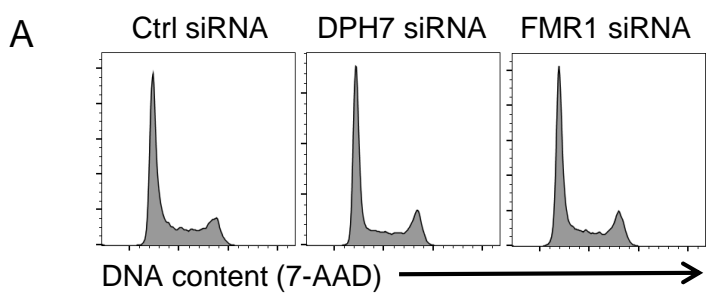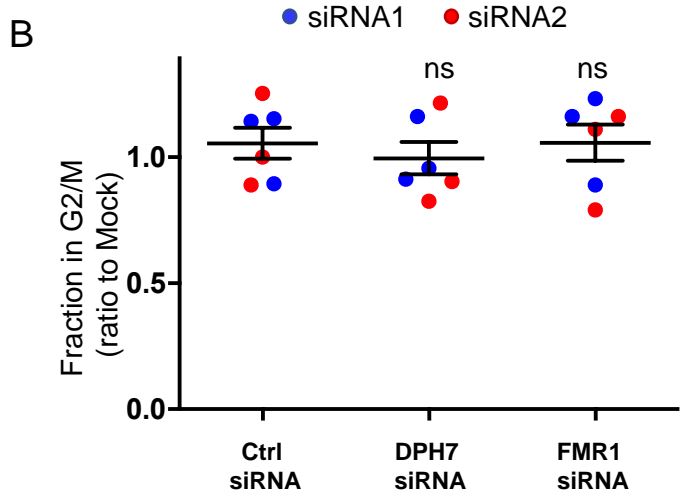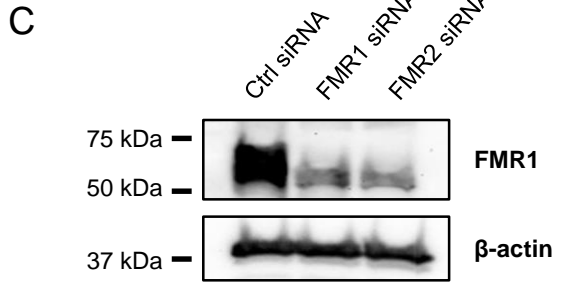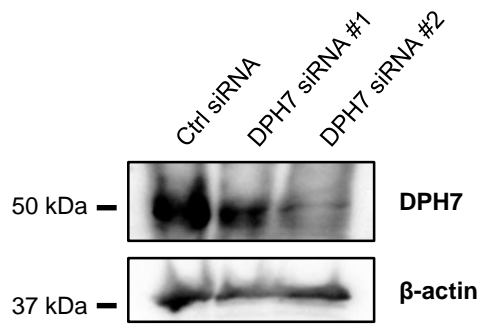

Figure 5–figure supplement 1

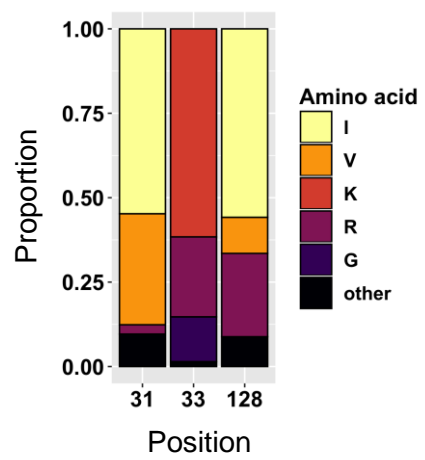

Figure 5—figure supplement 2

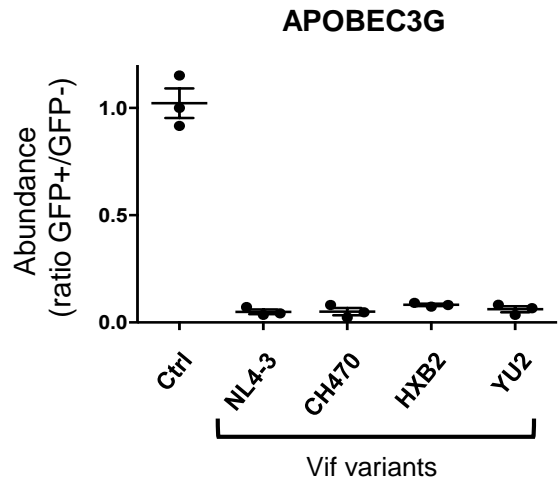

Figure 6–figure supplement 1

Exon Splicing Silencer of Vpr (ESSV)

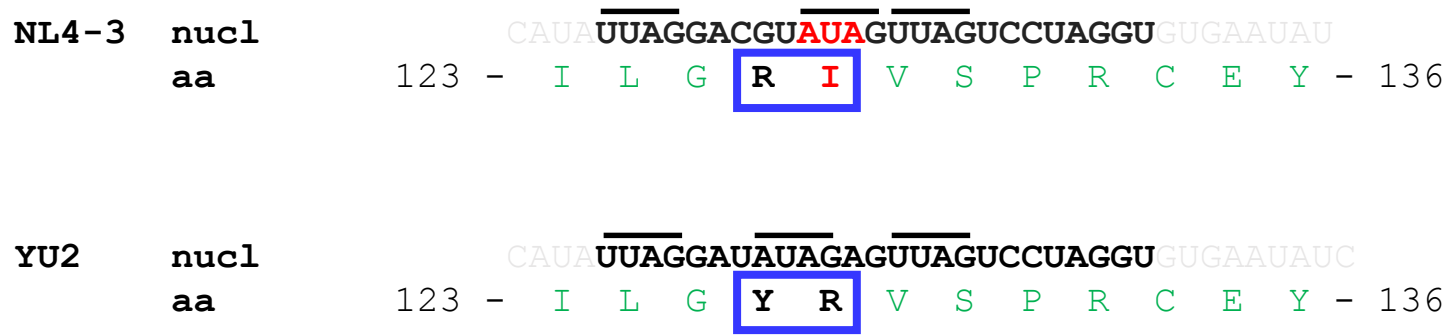

**Figure 6–figure supplement 2**

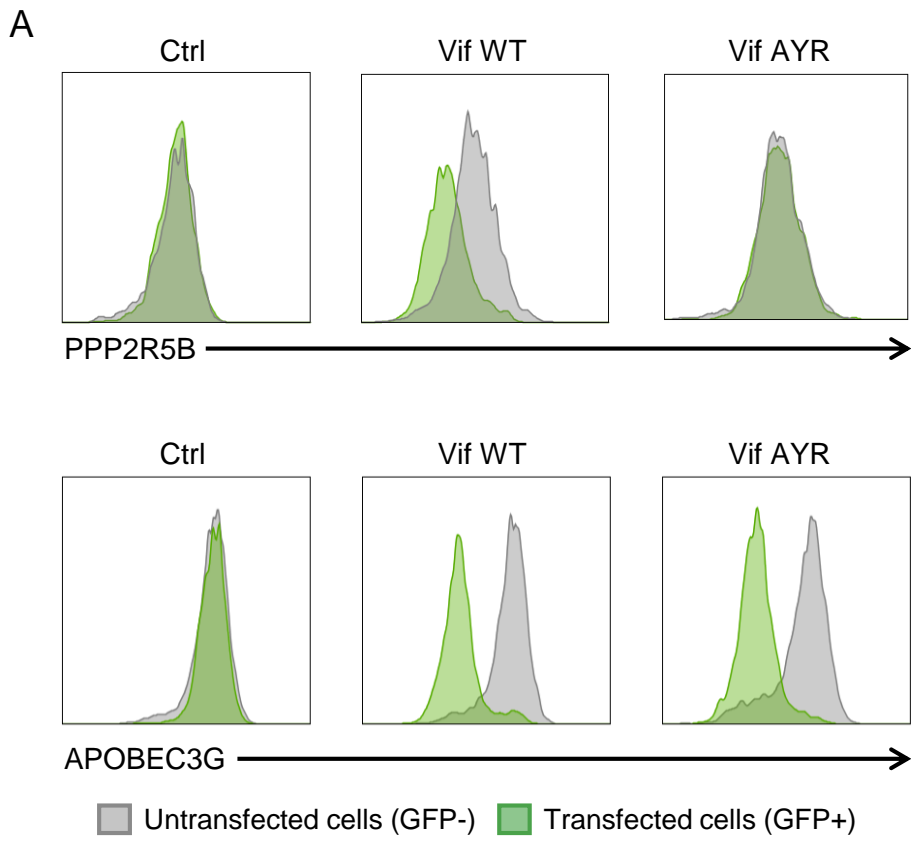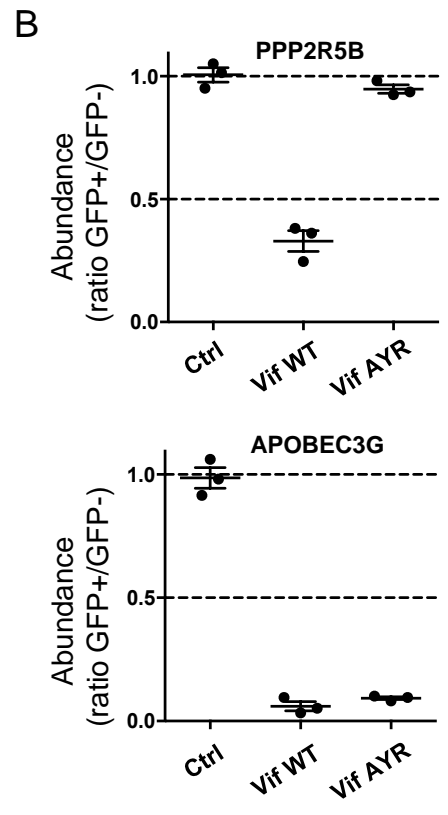

**Figure 6–figure supplement 3**

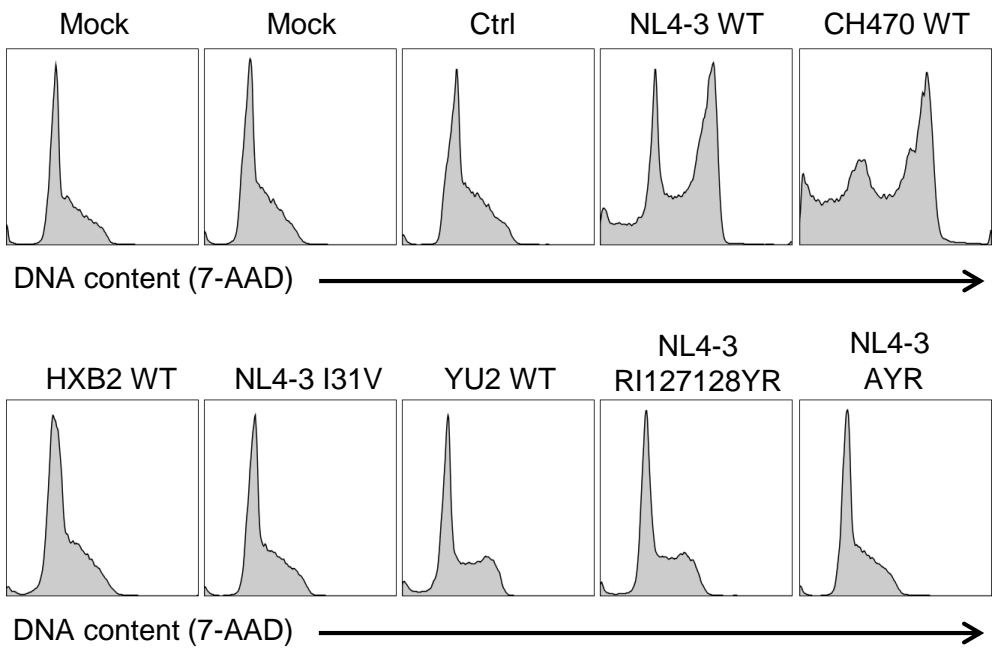

Figure 7-figure supplement 1

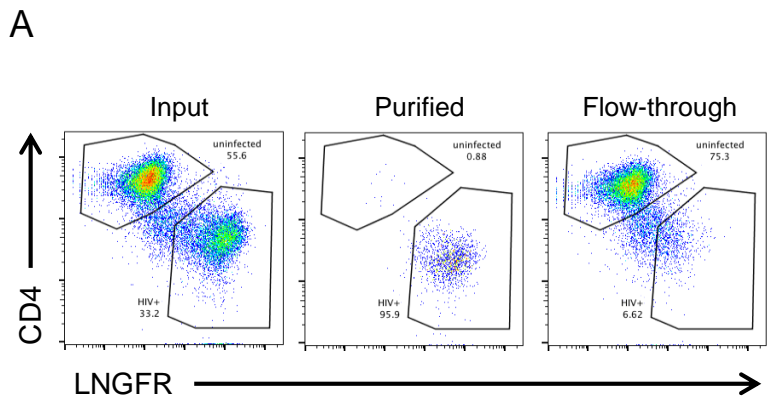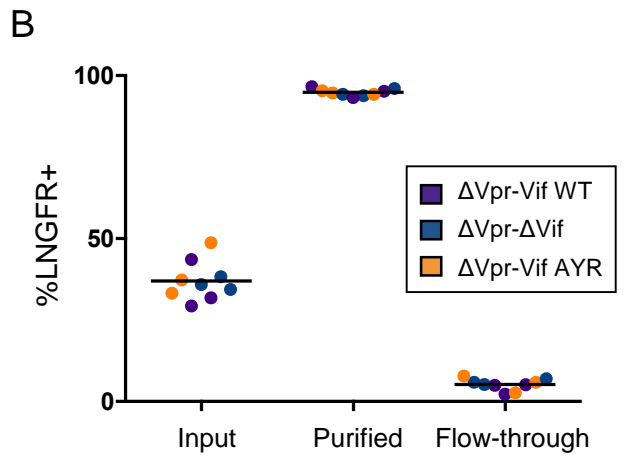

**Figure 7–figure supplement 2**

**A**

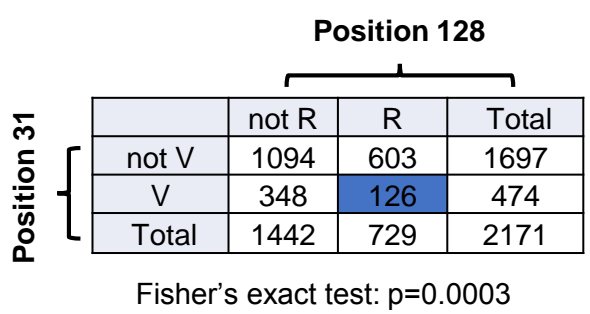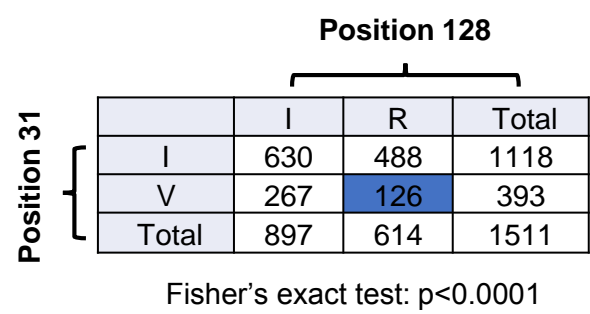

**B**

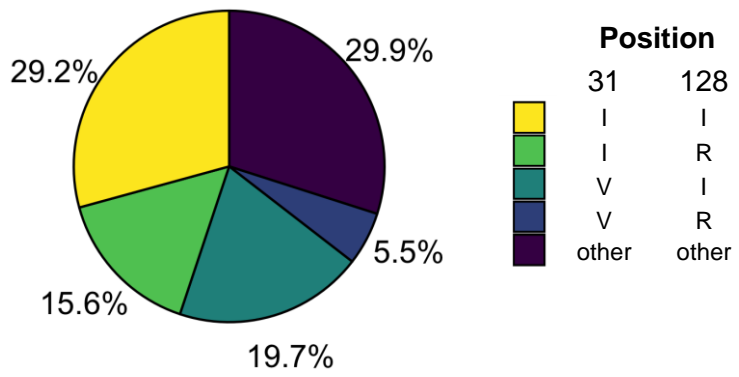

**C**

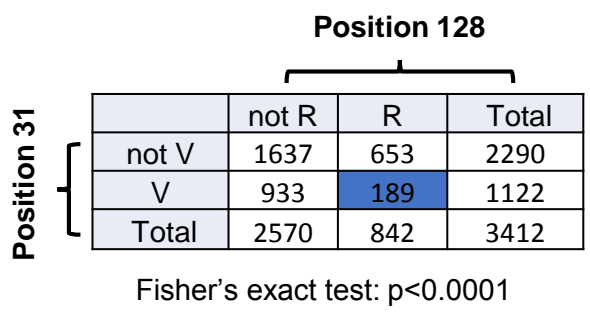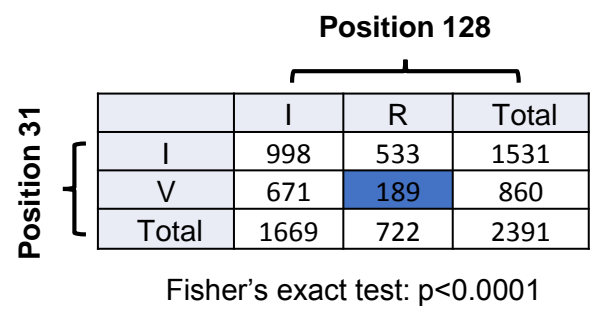



Figure 7-figure supplement 3

A

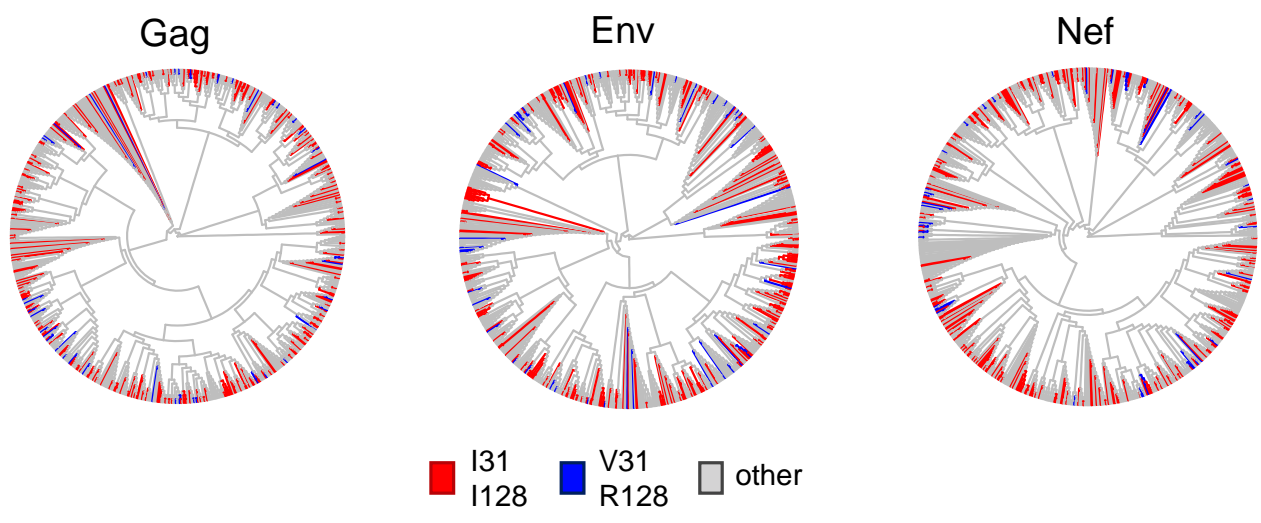

B

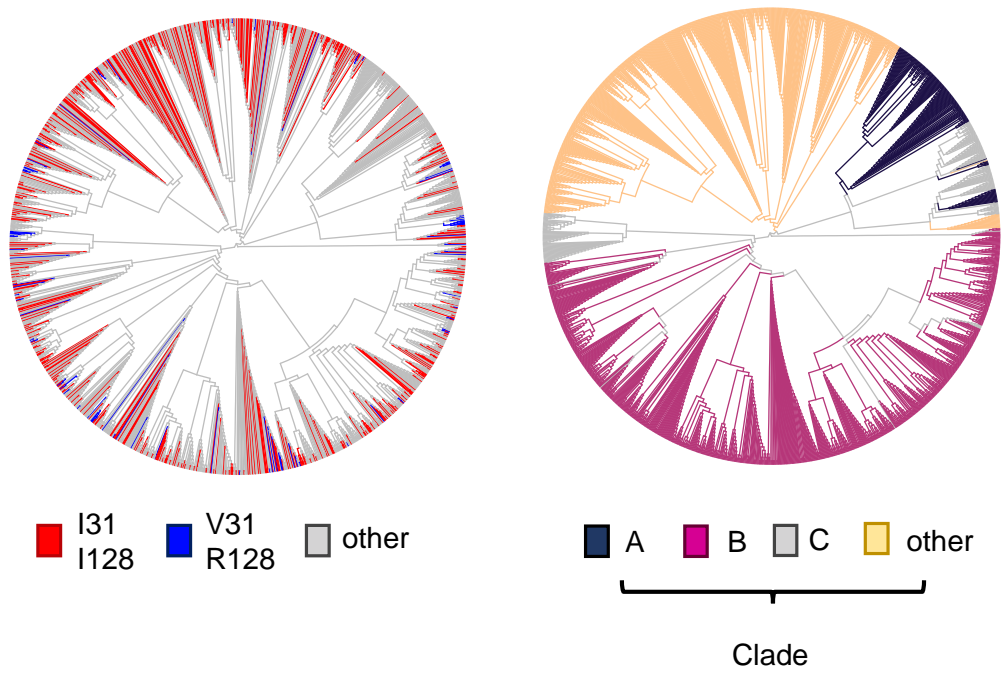

Source: https://www.biorxiv.org/content/10.1101/825752v1.full.pdf
